# Supplementary material
Source: PubMed Central journal article supplement (PMC8919858)
Supplement: NIHMS1772416-supplement-1.pdf [file NIHMS1772416-supplement-1.pdf]

Supplementary Material for:

**Genetic manipulation of gut microbes enables single-gene  
interrogation in a complex microbiome**

Wen-Bing Jin, Ting-Ting Li, Da Huo, Sophia Qu, Xin V. Li, Mohammad Arifuzzaman, Svetlana Lima, Huiqing Shi, Aolin Wang, Gregory G. Putzel, Randy S. Longman, David Artis, Chun-Jun Guo

## Table of Contents

|                                                                                                                                                                |    |
|----------------------------------------------------------------------------------------------------------------------------------------------------------------|----|
| SUPPLEMENTARY DATA FILE S1 .....                                                                                                                               | 3  |
| Section I. An estimated timeline of the GM pipeline .....                                                                                                      | 3  |
| Section II. Sequence optimization .....                                                                                                                        | 5  |
| Section III. Test the mixed-conjugation strategy in <i>C. sporogenes</i> ATCC 15579 ( <b>S107</b> ).....                                                       | 5  |
| Section III. Modulating <i>Clostridia bcat</i> expression and microbiome-derived metabolites using gene manipulation tools developed via the GM pipeline ..... | 6  |
| Section IV. Genetic disruption of <i>baiH</i> in <i>Faecalicatena contorta</i> S122 ( <b>S122</b> ) .....                                                      | 9  |
| Section VI. Isolation of gut bacterial strains from collected fecal samples .....                                                                              | 10 |
| Section VII. Colonize germ-free and SPF mice with the control and mutant bacteria .....                                                                        | 10 |
| SUPPLEMENTARY DATA FILE S2.....                                                                                                                                | 13 |
| 1. Sequences of the nine replication origins.....                                                                                                              | 13 |
| 2. Plasmid series pGM-ABCM to pGM-IBCM.....                                                                                                                    | 19 |
| 3. Plasmid series pGM-ABCL to pGM-IBCL.....                                                                                                                    | 25 |
| 4. Plasmid series pGM-ABCF to pGM-IBCF. ....                                                                                                                   | 33 |
| 5. Plasmid series pGM-ABCD to pGM-IBCD. ....                                                                                                                   | 41 |
| 6. Plasmid series pGM-ACAQ to pGM-ICAQ. ....                                                                                                                   | 48 |
| 7. Plasmid series pGM-ACBQ to pGM-ICBQ. ....                                                                                                                   | 56 |
| 8. Plasmid series pGM-NAC <sub>2</sub> B, NAC <sub>2</sub> P, NACO. ....                                                                                       | 64 |

# SUPPLEMENTARY DATA FILE S1

## Section I. An estimated timeline of the GM pipeline

An estimated timeline and the plasmids used in this study are shown in the figures below.

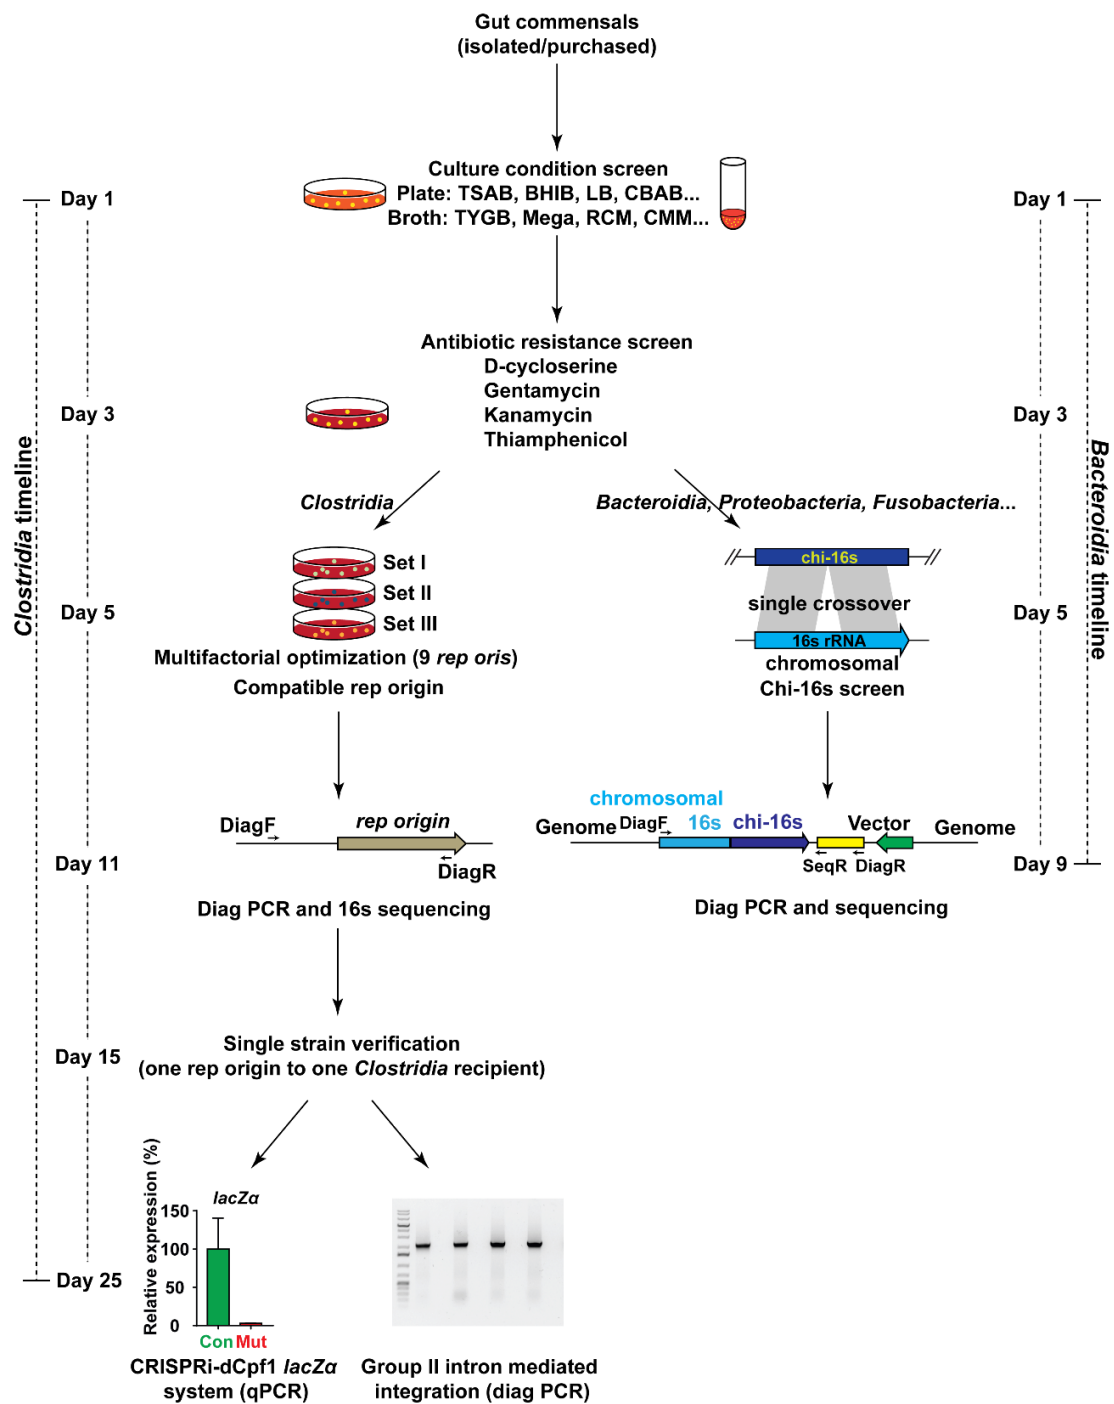

**Data S1A. A detailed workflow and general timeline of the genetic manipulation (GM) pipeline, related to Figure 1**

The non-model human gut commensals can be screened via the GM pipeline, and their targetable genetic system can be built within weeks.

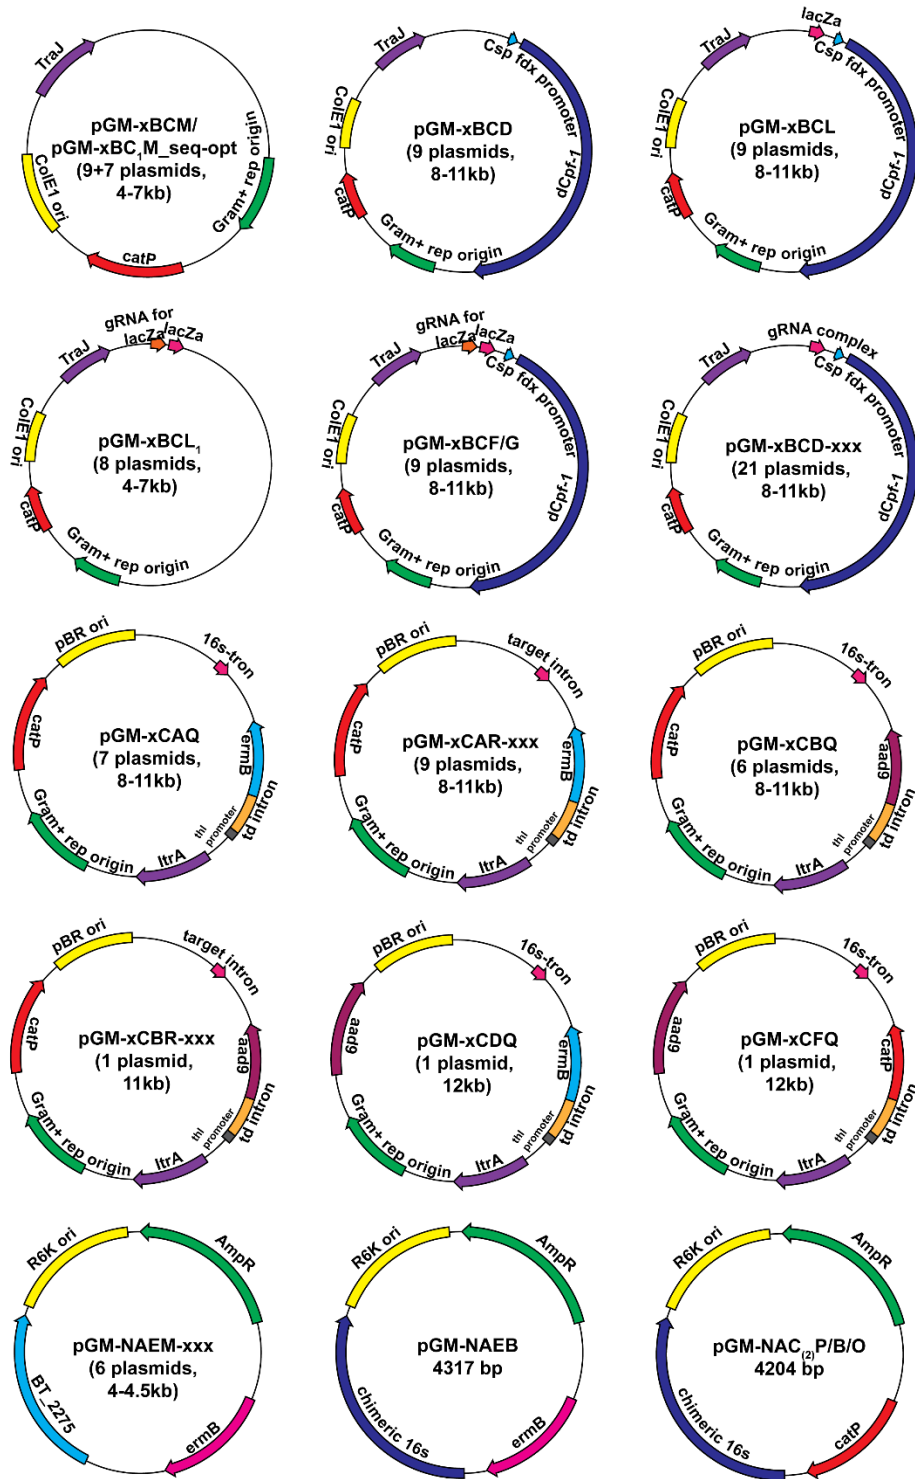

**Data S1B. All the pGM vectors used in this study, related to Figure 2**

Schematics of all the pGM vectors designed and used in this study are listed. “x” in pGM-xBCM (or pGM-xBCD, pGM-xBCL, pGM-xBCF/G, pGM-xBCD-xxx) represents different gram-positive replication origins,

and “xxx” in pGM-xBCD-xxx corresponds to plasmid pGM-xBCD harboring different gRNA designs targeting genome of different strains (see **Table S2** for detailed information and nomenclature).

## Section II. Sequence optimization

The set of *Clostridia* conjugation plasmids was sequence-optimized by **1)** codon-optimizing the coding sequences (CDSs) of *catP*, *traJ*, and *Clostridial rep oris* to reduce their putative *Clostridial* Type II-RM sites (**Table S2**), and **2)** replacing the *catP* promoter  $P_{\text{pmtl-catP}}$  with  $P_{\text{fdx}}$  (the most potent promoter identified via a promoter screen). In brief, we searched the REBASE database and found 22 cutting sites that are most often recognized by the Type II-RM of *Clostridia* bacteria (including the solventogenic *Clostridium* genus), putative RM sites reduced in the sequence optimization include: AAGCTT, ACACAG, ACTGGG, AGGCCT, CAGCTG, CCCGGG, CCCGT, CCGG, CCNGG, CCSSGG, CCWGG, CTAG, CTGCAG, GAATTC, GACGC, GASTC, GATC, GCGC, GCNGC, GGCC, GGNCC, GTCGAC. Then the CDSs of *catP*, *traJ*, and *rep oris* were codon-optimized to reduce the number of these restriction sites by at least half. Of note, the promoter and terminator of the CDS like *catP* or *traJ* and some highly repetitive motifs in the *rep oris* were left untouched. These sequences play a key role in regulating the functions of *catP* and *rep ori*, and any mutation (or nucleotide switch) could potentially cause dysfunction of *catP* or *rep ori* and lead to unsuccessful transformation. These plasmids are labeled with ‘seq-opt’. Please refer to **Table S1** for the *Clostridia* that uptakes this set of vectors. All the gene transfer conditions via conjugations/transformations have been repeated at least three times in our study.

## Section III. Test the mixed-conjugation strategy in *C. sporogenes* ATCC 15579 (S107)

A preliminary test was performed to assess if a model gut commensal **S107** can uptake plasmids with a compatible *rep ori* from three *E. coli* conjugation donors in one conjugation (**Data S1C**). We inoculated three *E. coli* HB101/pRK24 donors harboring three different vectors pMTL82254 (*rep ori*: pBP1; antibiotic: erythromycin), pMTL83353 (*rep ori*: pCB102; antibiotic: spectinomycin), and pMTL84151 (*rep ori*: pCD6; antibiotic: thiamphenicol), respectively. **S107** was inoculated in 1 mL TYGC liquid broth and grown anaerobically at 37 °C for 12~18 hrs. The three *E. coli* donors were inoculated into LB liquid broth supplemented with the corresponding antibiotics (erythromycin: 250 µg/mL; spectinomycin: 100 µg/mL; chloramphenicol: 25 µg/mL) and shaken at 220 rpm for overnight. The next day, 700 µL of each *E. coli* culture were mixed and centrifuged at 1500 x g for 2 min. The cell pellet was washed with 1.5 mL PBS (pH 7.4) and centrifuged again at 1500 x g for 2 min. The PBS supernatant was removed, and the cell pellet was transferred on ice into the anaerobic chamber. The cell pellet was mixed with 300 µL of the overnight **S107** culture, and a 35 µL cell mixture was dotted on pre-reduced TYG agar plates. After 48 hrs, the cell dots were scraped using a sterile inoculation loop and resuspended in 300 µL pre-reduced PBS (pH 7.4) buffer. 50 µL of the cell suspension was plated onto three TYG agar plates that were supplemented with

D-cycloserine (250 µg/mL) + erythromycin (10 µg/mL, to select for pMTL82254), or spectinomycin (500 µg/mL, to select for pMTL83353), or thiamphenicol (15 µg/mL, to select for pMTL84151).

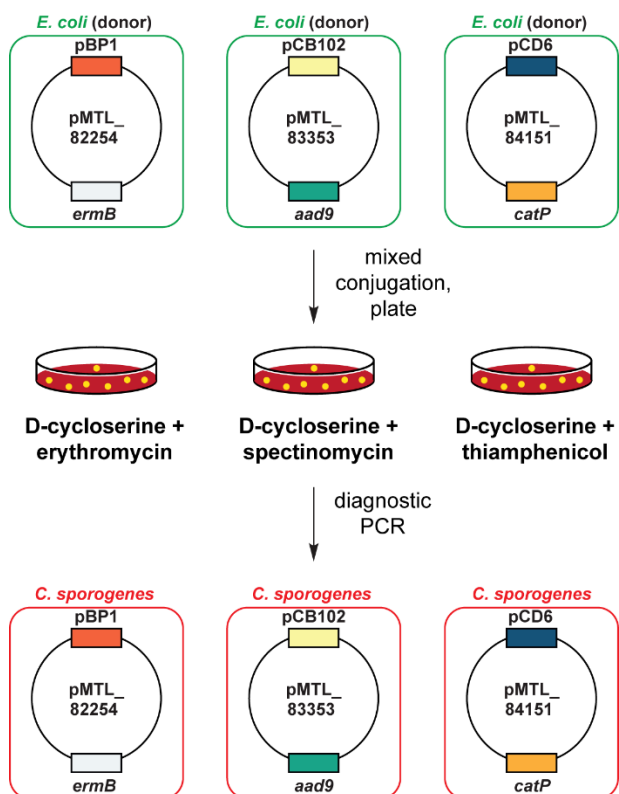

### Data S1C. Test of the mixed-conjugation strategy in S107, related to Figure 2

A preliminary test of the mixed-conjugation strategy was performed in a model gut commensal **S107**. The *E. coli* conjugation donors each harboring a single *Clostridium rep ori* and antibiotic marker gene (pMTL82254, *rep ori*: pBP1, antibiotic marker: *ermB*, erythromycin; pMTL83353, *rep ori*: pCB102, antibiotic marker: *aad9*, spectinomycin; pMTL84151, *rep ori*: pCD6, antibiotic marker: *catP*, thiamphenicol) were mixed and conjugated to a single recipient **S107**. After conjugation, the transconjugants were selected on agar plates supplemented with D-cycloserine and the one corresponding antibiotic (erythromycin for *ermB*, spectinomycin for *aad9*, and thiamphenicol for *catP*).

### Section III. Modulating *Clostridia bcat* expression and microbiome-derived metabolites using gene manipulation tools developed via the GM pipeline.

#### 1. Targeted suppression of BCAA aminotransferase (*bcat*) gene and modulate butyrate production in non-model gut *Clostridia*

Using the strain **S72** as an example. The assembled vectors pGM-FBCD and pGM-FBCD-010 were transformed into chemically competent *E. coli* CA434, respectively. *E. coli* CA434 harboring pGM-FBCD and pGM-FBCD-010 were conjugated to S72. The transconjugants were picked and restreaked onto TSAB supplemented with D-cycloserine (250 µg/mL) + thiamphenicol (15 µg/mL). Then, three isolated

single colonies were cultivated in 5 mL Mega broth supplemented with D-cycloserine (250 µg/mL) + thiamphenicol (15 µg/mL) for 36 hrs, the RNA was extracted, and qPCR was performed to quantify the relative expression of *bcat* after normalizing to 16S rRNA gene (**Table S2, Fig. S3**).

To deplete *croA* in *Clostridia* strains utilizing Group II intron, the assembled plasmid pGM-FCAR-003 targeting *croA* in **S115** was introduced into **S115** via conjugation (**Table S1**). Next, four transconjugants were restreaked onto a TSAB plate with 9 µg/mL thiamphenicol and 200 µg/mL gentamycin to isolate a single colony. The single colonies were inoculated into 1 mL Mega supplied with the same antibiotics. After 24-36 hrs, 1 mL of cultures were spread onto TSAB plates supplemented with 200 µg/mL gentamycin and 10 µg/mL erythromycin. The integrated colonies typically appeared after 48-72 hrs. Eight colonies were picked to inoculate 3 mL Mega supplemented with 200 µg/mL gentamycin and 10 µg/mL erythromycin. After 24-36 hrs, the genomic DNA was extracted diagnostic PCR was performed.

The butyrate production was evaluated by glucose assay with PBS washed cell of control, and *croA* mutant, 3 mL of culture was first centrifuged at 1500 x *g* for 3 min. The cell pellet was washed twice with 1 mL PBS (pH 7.4) and centrifuged again at 1500 x *g* for 3 min. The PBS supernatant was removed, and the cell pellet was resuspended with 500 µL PBS, and then glucose was added to the concentration of 1 mM. The mixture was incubated anaerobically at 37 °C for 1 h. The PBS suspension was subjected to SCFAs derivatization and LCMS measurement.

## 2. Genetic manipulation of *Bacteroidia* strains to deplete propionate production

Taking **S25** as an example, the assembled plasmid pGM-NACM-003 was introduced into **S25** via *E. coli* conjugation. About 48 hrs after plating the conjugation cell mixture, four colonies were picked and restreaked on a TSAB plate + 200 µg/mL gentamycin + 15 µg/mL thiamphenicol to isolate single colonies. A single colony was inoculated in 3 mL TYBG broth with the same antibiotics, and the bacterial genomic DNA was extracted. The diagnostic PCR was performed to verify the single crossover integration of pGM-NACM-003 into *mmdA* (**Data S1D**).

## 3. Targeted suppression of *porA* gene in **S107**

The assembled vectors pGM-ABCD (control) and pGM-ABCD-006 (*porA* transcription repression mutant) were introduced into **S107** via conjugation. For each conjugation, three isolated single colonies were cultivated in 5 mL TYGC liquid broth supplemented with D-cycloserine (250 µg/mL) + thiamphenicol (15 µg/mL) for 36 hrs. Then RNA was extracted, and the relative expression of *porA* in the control strain and its transcription repression mutant was quantified. To quantify the production of branched short-chain fatty acid, 10 µL supernatant of both the control strain and the *porA* transcription repression mutant was derivatized and subject to LC-qTOF analysis.

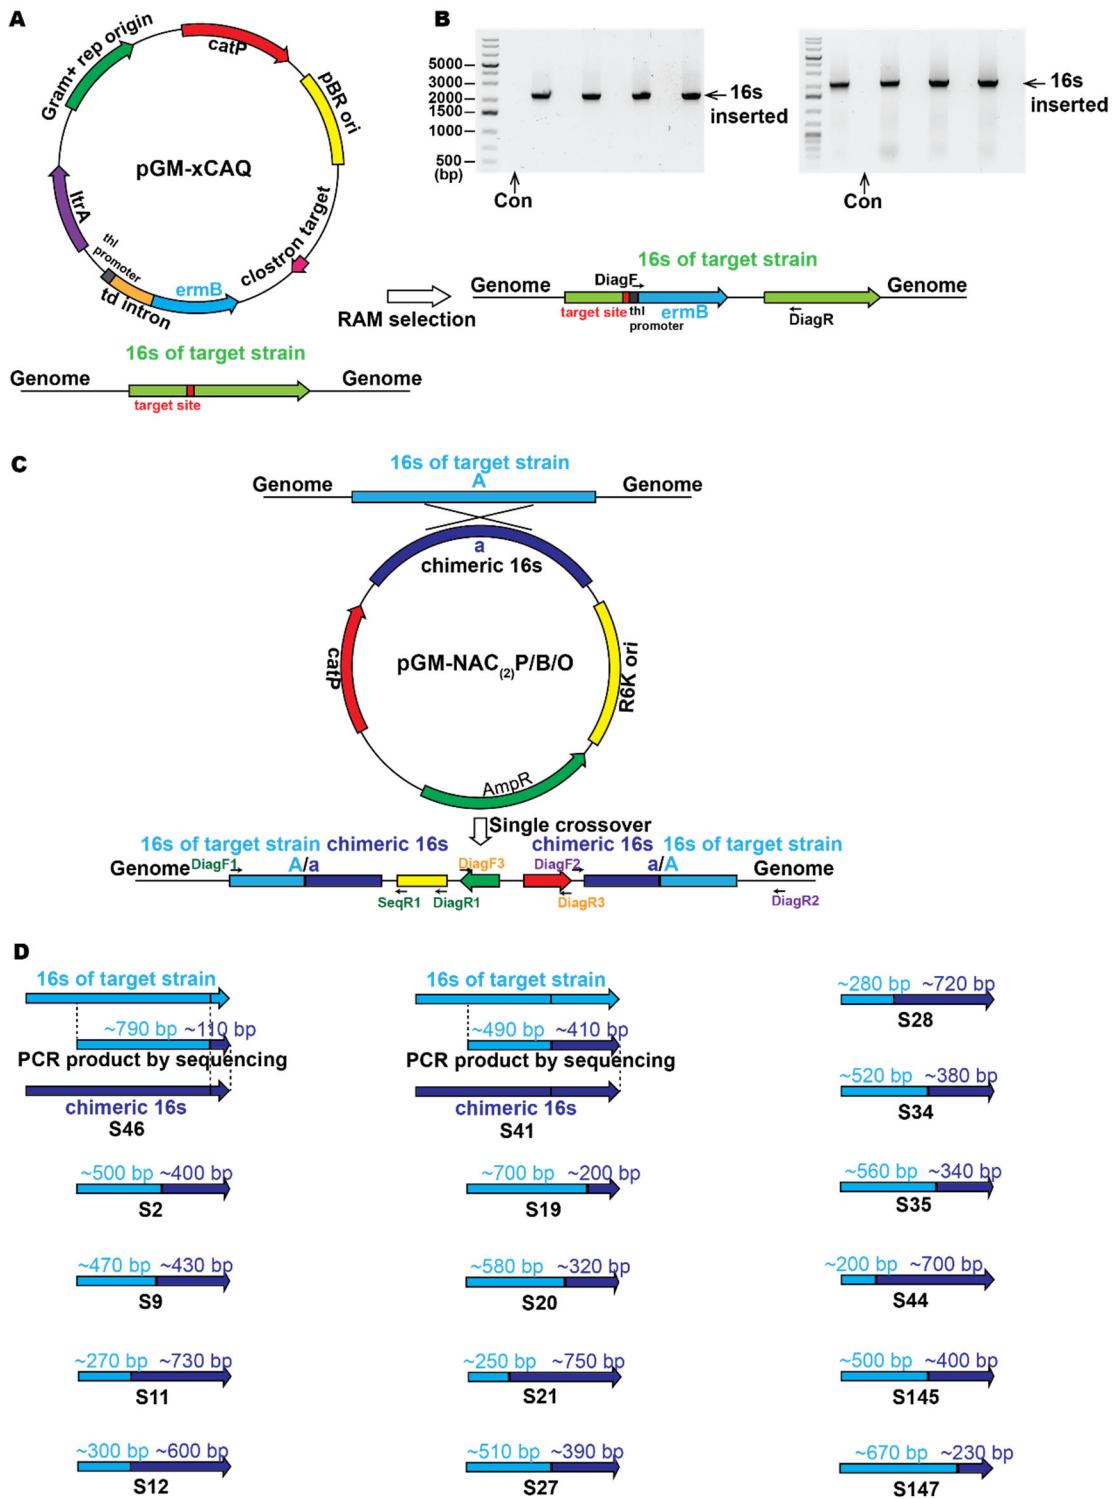

**Data S1D. Diagnostic PCR strategy, related to Figures 2 and 3**

(A) Diagnostic PCR strategy to verify the 16S-tron retrotransposition-activated marker (RAM) integration designed in targeted *Clostridia* commensals. The forward diagnostic primer is the sequence on the retrotransposition-activated site, which will not bind to the genome. The



reverse diagnostic primer binds to the genome and will not bind to the Group II intron plasmid. There will be a PCR product of 2.0-2.5 kb as designed for colonies that have integrated the retrotransposition-activated marker, whereas no PCR product will be found for control colonies.

**(B)** Two representative gel images of 16S-targeting Group II intron integration in *Clostridia*. There were bands of ~2.0-2.5 kb in colonies after RAM integration using primers described in **(A)**, while no band was found in colonies of control.

**(C)** Diagnostic PCR strategy to verify the single crossover designed in targeted *Bacteroidia* commensals and microbes from other phyla. The genomic DNA of the wild-type microbe and the integration plasmids were used as controls. The diagnostic PCR strategy is the same for identifying the genetically targetable *Bacteroidia* and other phyla microbes using chi-16S strategy and for targeted deletion of *mmdA* in three *Bacteroidia* microbes to deplete propionate production. One diagnostic PCR primer is the sequence on the target gene of the genome (16S rRNA gene or *mmdA*), which will not bind to the introduced suicide plasmid, the other diagnostic PCR primer binds to the suicide plasmid-specific sequence and will not bind to the genome of targeted strains. There will be a PCR product of ~2.0-2.5 kb (from diagnostic primer pairs DiagF1 + DiagR1 and DiagF2 + DiagR2) as designed for colonies that have integrated the suicide plasmid, whereas no PCR product will be found for wild-type colonies. Also, diagnostic PCR was conducted with primers DiagF3 + DiagR3 to validate the existence of antibiotic marker integrated, and DiagF2 + DiagR3 to confirm the integration of suicide plasmid and no intact plasmid in the recipient microbe. For screening using chi-16S, the sequencing primers DiagF1 and SeqR1 were used for the PCR fragment from DiagF1 + DiagR1, sequencing primers DiagF2 and DiagR2 were used for the PCR fragment from DiagF2 + DiagR2. As the chimeric 16S is integrated into the genome, the nucleotide sequence (from Sanger sequencing) consists of part of the original 16S rRNA sequence and part of the chimeric 16S rRNA sequence.

**(D)** Alignment of the nucleotide sequence of the PCR product amplified using DiagF and DiagR (as shown in **(C)**) with the chimeric 16S rRNA sequence and the microbial 16S rRNA sequence for the genetically targetable *Bacteroidia* and microbes from other phyla identified using chi-16S. The number shown is a rough estimation of the integration position based on Sanger sequencing and alignment.

The numbering of the strains corresponds to the strain information shown in **Table S1**. All the PCR fragments were purified and sent for Sanger sequencing.

#### **Section IV. Genetic disruption of *baiH* in *Faecalicatena contorta* S122 (S122)**

To disrupt the *baiH* gene, *baiH*-targeting plasmid pGM-FCAR-002 was first introduced into **S122** via conjugation. Next, four transconjugants were restreaked onto a TSAB plate with 15 µg/mL thiamphenicol and 250 µg/mL D-cycloserine to isolate a single colony. The single colonies were inoculated

into 1 mL Mega supplied with the same antibiotics. After 24-36 hrs, 50  $\mu$ L of cultures were spread onto TSAB plates supplemented with 250  $\mu$ g/mL D-cycloserine and 10  $\mu$ g/mL erythromycin. The integrated colonies typically appeared after 36-48 hrs. Eight colonies were picked to inoculate 3 mL Mega supplemented with 250  $\mu$ g/mL D-cycloserine and 10  $\mu$ g/mL erythromycin. After 24-36 hrs, the genomic DNA was extracted, and diagnostic PCR was performed (**Fig. S4C**).

To confer the *baiH* mutant strain with thiamphenicol resistance, the plasmid pGM-FCFQ was first introduced into three independent isolates of **S122** *ΩbaiH* via conjugation. After conjugation, the **S122**+pGM-FCAR-002 colonies harboring pGM-FCFQ appeared on the TSAB plate supplemented with 10  $\mu$ g/mL erythromycin, 300  $\mu$ g/mL spectinomycin, and 250  $\mu$ g/mL D-cycloserine. Next, four colonies were restreaked onto a TSAB plate with the same antibiotics to isolate single colony. The single colonies were inoculated into 1 mL Mega supplied with the same antibiotics. After 24-36 hrs, 50  $\mu$ L of cultures were spread onto TSAB plates supplemented with 250  $\mu$ g/mL D-cycloserine, 15  $\mu$ g/mL thiamphenicol, and 10  $\mu$ g/mL erythromycin. The integrated colonies typically appeared after 36-48 hrs. Colonies were picked to inoculate Mega supplemented with 250  $\mu$ g/mL D-cycloserine, 15  $\mu$ g/mL thiamphenicol, and 10  $\mu$ g/mL erythromycin.

Likewise, the **S122** control strain with both erythromycin and thiamphenicol resistance was constructed using 16S-targeting plasmid pGM-FCAQ and pGM-FCFQ. The engineered strains with thiamphenicol and erythromycin resistance were validated and still carry at least one copy of intact 16S rRNA gene in their genomes by diagnostic PCR.

## **Section VI. Isolation of gut bacterial strains from collected fecal samples**

Fecal samples (from human or mouse) were suspended in PBS (1:10 w/v), the suspension was then restreaked on TSAB/BHIB plates and incubated in an anaerobic chamber at 37 °C. In the meantime, the suspension was also restreaked on LB plates and incubated aerobically at 37 °C. Colonies typically appeared after 24-36 hrs. The isolated single colonies were inoculated in 3 mL Mega/RCM/CMM/TYBG or LB broth. After ~12 hrs, we extracted their genomic DNA and amplified the 16S rRNA region of the colony using primers 16S\_27F + 16S\_1391R. The PCR product was purified and sent for Sanger sequencing to identify the species of the isolated strains.

## **Section VII. Colonize germ-free and SPF mice with the control and mutant bacteria**

Three isolates of control and mutant strains were prepared and mixed before colonization. For mono-colonization in germ-free mice, taking *Eubacterium maltosivorans* DSM 105863 control (S117+pGM-FBCD) and its SCFAs mutant (S117+pGM-FBCD-020) as an example, a 200  $\mu$ L portion of their overnight RCM culture (~1 x 10<sup>7</sup> CFU) were mono-colonized with germ-free mice (n = 4 per group) via oral gavage. The germ-free mice were maintained on standard chow and water containing minimal thiamphenicol (15  $\mu$ g/mL). Successful colonization was determined by colony-forming unit (CFU) counting. After two weeks

of colonization, mice were euthanized humanely by CO<sub>2</sub> asphyxiation. Blood was collected by cardiac puncture, and serum was prepared using microtainer serum separator tubes obtained from Becton Dickinson (Cat. # 365967). The urine, cecal contents, and feces were collected and snap-frozen in liquid nitrogen and stored at -80 °C until use.

For co-colonization of **S122** control or its *ΩbaiH* mutant together with **S25** in germ-free mice, 1 mL of their overnight Mega culture (~1 x 10<sup>7</sup> CFU) were mixed and co-colonized with germ-free mice (n = 4 per group) via oral gavage (300 µL per mouse). The germ-free mice were maintained on standard chow and water supplemented with 15 µg/ml thiamphenicol. Successful colonization was determined by CFU plating, diagnostic PCR using their strain-specific primers, and 16S rRNA sequencing.

For co-colonization of **S122** control or its *baiH* mutant together with two *Bacteroides* (3-member community) mentioned in **Fig. S7G**, and co-colonization of **S122** control or its *baiH* mutant together with two *Bacteroides* (*Bac1-2*) and seven *Erysipelotrichaceae* (*Ery1-7*) (10-member community) in **Fig. 7D**, 1 mL of their overnight Mega culture (~1 x 10<sup>7</sup> CFU) were mixed and co-colonized with germ-free mice (n = 3 or 4 per group) via oral gavage (300 µL per mouse). The germ-free mice were maintained on standard chow, and cholic acid sodium salt (5mM for the 10-member community and 0.5 mM for the 3-member community) was supplied in water to facilitate **S122** colonization and ensure both gnotobiotic mice settings have comparable gut bile acid profiles. Successful colonization of **S122** was determined by the Colony-forming unit (CFU) counting (plating on TSAB agar + 10 µg/ml erythromycin and 15 µg/ml thiamphenicol), diagnostic PCR using **S122** specific primers, and LCMS monitoring of CA to DCA conversion of CFU colonies.

For co-colonization of **S122** together with 55 other genetically targetable strains identified in this study, 1 mL of their overnight Mega/RCM/CMM culture (~1 x 10<sup>7</sup> CFU) were mixed and co-colonized germ-free mice (n = 5 per group) via oral gavage (300 µL per mouse). The germ-free mice were maintained on standard chow. Successful colonization of **S122** was determined by LCMS monitoring of CA to DCA conversion, and colonization of **S122** and other strains was confirmed by 16S rRNA sequencing.

For the colonization of **S122** control or its *baiH* mutant in SPF mice, a 300 µL portion of their overnight Mega culture (~1 x 10<sup>7</sup> CFU) were colonized with SPF mice (n = 4 per group) via oral gavage, twice per day for 3 days in a row. The SPF mice were maintained on standard chow (Lab Diet 5053) and water containing thiamphenicol (15 µg/mL) and erythromycin (10 µg/mL). Successful colonization was determined by colony-forming unit (CFU) counting (performed at least weekly, plating on TSAB agar + 10 µg/ml erythromycin and 15 µg/ml thiamphenicol), diagnostic PCR using **S122** specific primers, and LCMS monitoring of CA to DCA conversion of CFU colonies.

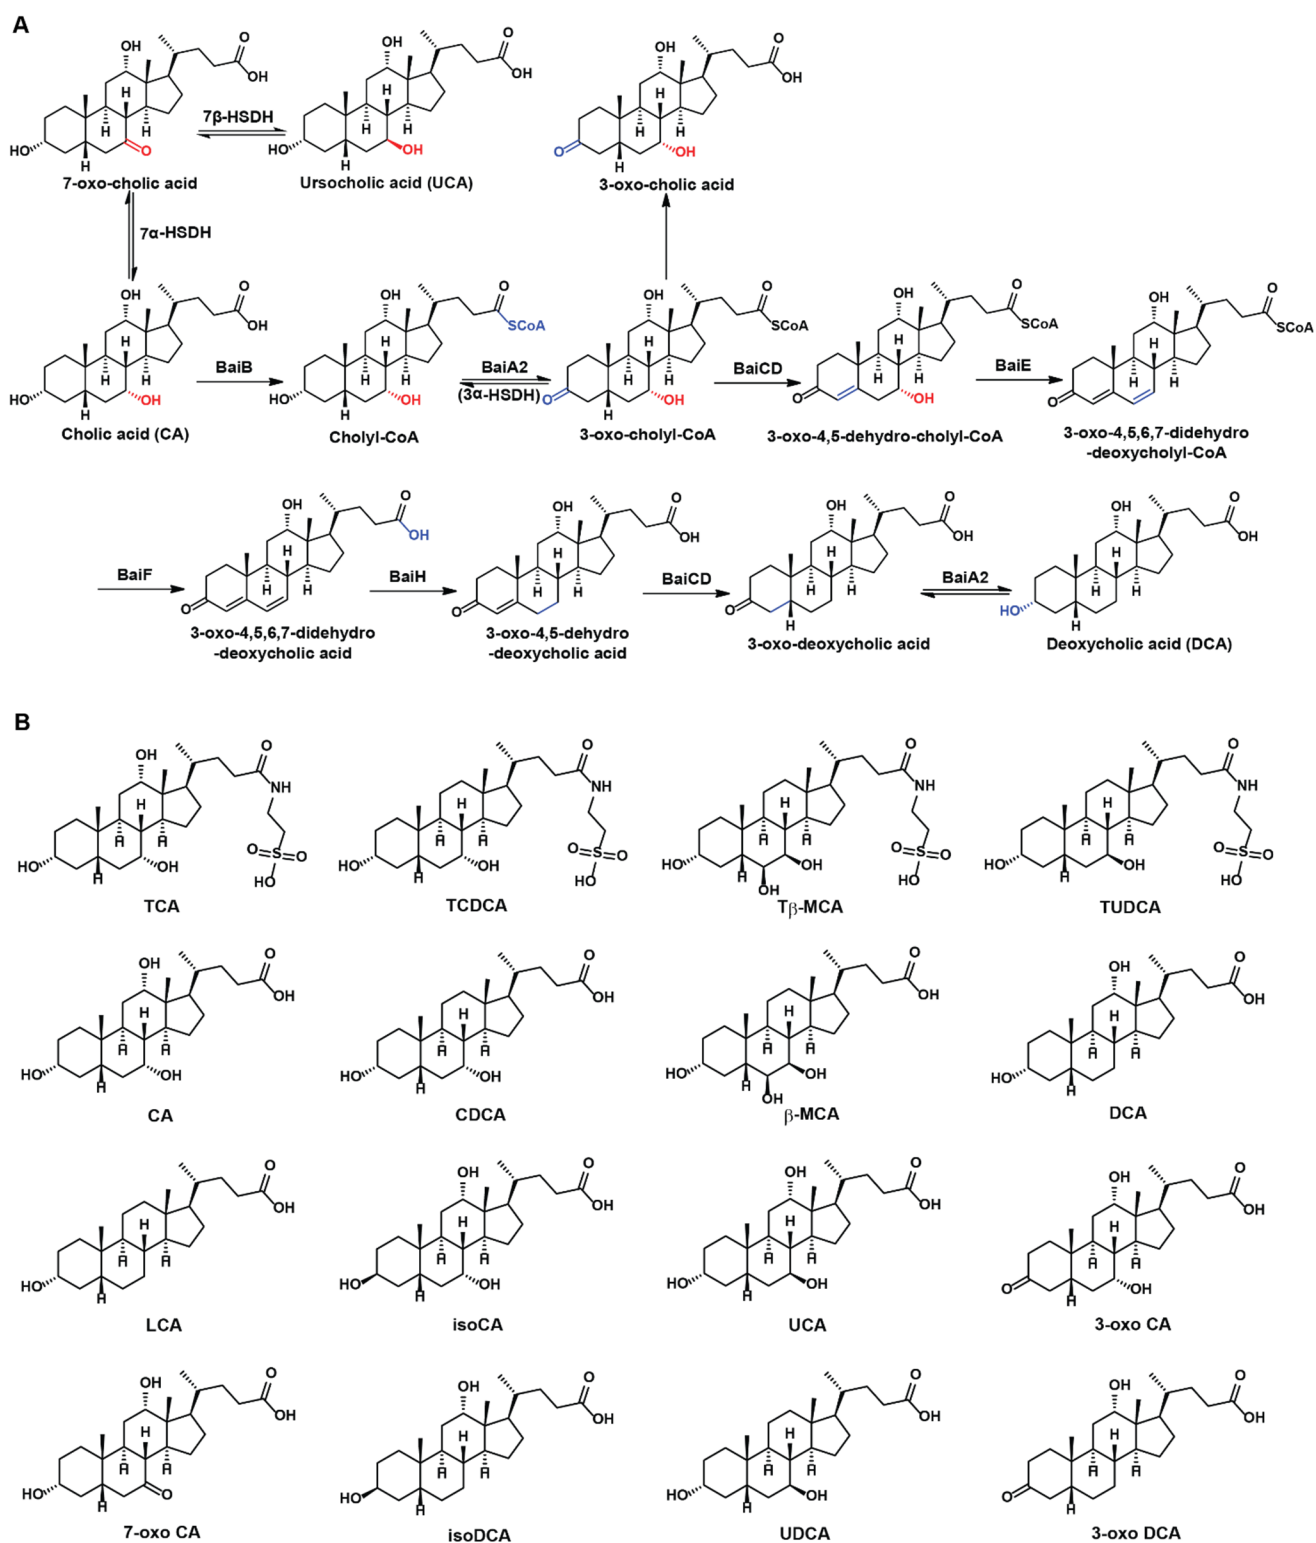

**Data S1E. Proposed pathway for the 7 $\alpha$ -dehydroxylation of cholic acid (CA) to deoxycholic acid (DCA) and the structures of taurine-conjugated and nonconjugated bile acids in this study, related to Figure 4**

## SUPPLEMENTARY DATA FILE S2

1. Sequences of the nine replication origins. Sequences marked in green are homologous to the plasmid for Gibson assembly.

### A. pBP1 (*C. botulinum*)

gaatggcgaatggcgctagc ataaaaataagaagcctgcattgcaggcttctatTTTTatggcgcgccgttctgaatccttagcta atggttcaacag  
gtaactatgacgaagatagcacctggataagtctgta atggttcaaggcattaatgaagacgtgtataaaaatgtgcta atgaaaaa gaaaa  
tgcgttaaaagagcctaaaaatgagttcaaatggtttgaa attgattggtagtttaattaatatTTTTctattggctatctcgatacctataga atcttctgt  
tcactttt gttttgaaatataaaaaggggcttttagccctTTTTtaaaactccggaggagtttcttcttgatactatac gtaactattttcgattgact  
tcattgtcaattaagctagtaaaatcaatggttaaaaaacaaaaa actgcattttctacctagtaattataatTTtaagtgctgagtttaaa agtataat  
taccaggaaaggagcaagtttttaataaggaaaaatTTTcttttaaaattctatTTcgttatatgactaattataatcaaaaaaatgaaaaataacaa  
gaggtaaaaaactgcttagagaaatgtactgataaaaaagaaaaa atcctagattacgtcatacatagcaccttaactactaagaaaaatattg  
aaaggactccacttggagattatTTgtttatgttgagtgatgcagacttagaacattttaaattacataaaaggta atTTTtgcgta atagattttgtcca  
atgtgtagttggcgactgcttgaaggatagtttagaa atatcttctatggagcatttaagaaaagaagaaaaataa agagtttataTTTTaactctta  
caactccaaatgtaaaaagttatgatcttaatttctattaa caaatataataaatctTTtaaaaaat taatggagcgtaaggaagtaaggatataact  
aaaggttatataagaaaat tagaagtaacttccaaaaggaaaaatacataacaaaggattatggaaaataaaaaa agattatcaaaaaa  
aaggactgaaattggtgatttagaaccta atTTtgatacttataatcctcattttcatgtattatgcagttaataaa agttatTTtacagataaaaattatta  
tataaatcgagaaagatggttgaattatgga agtttctactaaggatgattctataactcaagttgatgttagaaaagcaaaaat taatgattataa  
agaggtttacgaactgCGaaatattcagctaaagacactgattatTTaatatcgaggccaglatttgaa atTTTTtataaagcattaaaaggcaagca  
ggtattagTTTTtagtgattTTTTaaagatgcacacaaattgtacaagcaaggaaaacttgatgtttataaaaagaaagatgaa atTTaatatgtctata  
tagtttattataatggtgcaaaaaaca atatgaaaaactagaataagggaacttacggaagatgaaaaagaaga atTTaatcaagattta atag  
atgaaatagaaatagattaa agtgaactatactttatataatagtaaaaaaataaaaaacaacagcctattaggtgtgtTTTTtatttttattaa  
TTTTta atTTtagttttagttctTTTTaaataagttcagcctctTTTcaat atTTTTaaagaaggagtattgcatgaattgcctTTTTtctaacagacttagg  
aaatTTTTaacagtatcttctgCGcgggtgattttgga actcataactacta atTTtataattattttctTTTTaattgtaacagttgcaaaagaagctg  
aacctgttcttcaactagttatcatcttca atataatTTtgacctatatagtataa atatTTTTtattatTTTTactTTTTtctgaatctattTTTTataatca  
aaaaagTTTTaccacaaaaga aggtgtactccttctggtccaacataTTTTtactatattatctaa atataTTTTtgggaactggtgtgta atTTgattaat  
cgaacaaccagttatactta aggaattataactataaaaaatataaggattatctTTTaaattcattattggcctcTTTTtataa atTTatgttaccataa  
aaaggacataacggga atatgtaga atTTTTta atgtagacaaaatTTacataa atataaagaagga agtgtttgTTTaa atTTtagcaaacat  
caaaaat taggggataaaa atTTatgaaaaa aggtttc gatgtt atTTTatgttta acttta atagttgtgTTTattaca aatcggc cggccagtg  
ggcaagttg

### B. pCB102 (*C. butyricum*)

gaatggcgaatggcgctagc ataaaaataagaagcctgcattgcaggcttctatTTTTatggcgcgccgcca atTTTTTTgaacaattgacaattca  
tttctatTTTTtata agtgatagTcaaaaggcataacagtgctga atagaaaga atTTtacagaaaagaaa atTTataga atTTtagtattgatta atTTatac  
tcattatga atgTTta atTTga atcaaaaaaa atactgttatgtattca atTTacgggttaaa atatagaca agttgaaaa atTTtaaaaaaa ataa g  
tctcagctcttatata atagctacca acttagtatata agccaaa actta atgtgctacca acacatca agccggttagaga actctatctatagca

atatttcaaatgtaccgacatacaagagaaacattaactatataattcaatttatgagattatcttaacagataaaatgtaaattgcaataagtaagat  
ttagaagttatagcctttgtgtattggaagcagtagcgaaggctttttatttgataaaaattagaagatatttttttcataattaattatgaaaatga  
aagggggtgagcaaagtgcagaggaaagcagtagcttatacaataacaaggtaggaatcattattgacttttagcagtaaaccattatgacttt  
tatagtctgtagctaagtagtacgaaagggggagcttataaaagctccttgaatacatagaattcataaattaattatgaaaagaagggcgat  
atgaaaactgtaaaaattgcaaagagtttataaagatactgaaatatgcaaaaacattcgttgatgattcatgataaaaacagtagcaacctattgc  
agtaatacaatgagtagcaagatgtttacataaagggaagtgcaatgtattaattgttcaagatgaaccgatatggatgggtgccataaaaatga  
gatgttttacagaggaagaacagaaaaaagaacgtacatgcattaaatattatgcaaggagcttataaaagctcatgtaaagaagagtaaaaa  
gaaaaataatttttataatattatgagagtgccgacacagtagtgcactaaaaatatactgtgggtgtagtagccgatacaaaaggatag  
cactcgcatttcataatacatcttatgttatgattatgtgtcgggtgggacttcacgacgaaaaccacaataaaaaaagagttcggggtagggtaag  
catagttgaggcaactaaacaatcaagctaggatagcagtagcagaccgtaaggctgttttaggtgtttgaatacatagctattaagatga  
aaaatacggataccaatgaagggaagataatgttgatgtagttgtttgttcatctatgggcaaacctacgtccaaagccgtttccaaatctgcta  
aaaagtatactttctaaaatcaaagtcaagtagaaatcataaataaagtttaattttgaagttattatgatattgttttctataaaataaattaagta  
tatagaatagtttaataatagtagtatacttaatgtgataagtgtagcagtagtcacagaaaggatgattgttatggattataagcggc**cgggccagtg**  
**caagttg**

C. pCD6 (*C. difficile*)

**gaatggcgaatggcgctagc**ataaaaaataagaagcctgcatttcaggcttctattttatggcgcgcccgcccttaagtctaaaaattaggggag  
atgtaaggattttgggaaaaatagaagatgttataatcataaatatggtagcttaggcttaaagtcaaaaaggagggtgaaatataaatagatttttagc  
taaattaagtaagaaataggaggagattattgaacaaaaatagaaaaaccattgtataaagagagagtagcattgactggatagatgttga  
aattttcaaaaaatagagtagaacaagcaatataatgtttatgttgggagtagttgtgcatataacatgagagctagaagtagtaaatggagatacc  
atataagaacaaataaagctatattgttaacattaaaaatttatatacacttgaattgtttataaaatggaattaaagttgcagataatattat  
aatgataagctatactatagcaatatagcagagttgaagaattgaaacactagaaaaagctagagaggtagaagtagtactattataagtaaatatc  
aatttttagattctataaatcacatgttaaaacaaaaaataattttattgagtaataaggatagtggttaaacataactaaaaatggaaatacaaat  
ttgaaagtaaaaaataaatacatagaaaaacataagaacaagccaataatgagataccatatcaactgtcaattcaatacagatggaagtgca  
aaagtattacacaggagttgaaccaatattggaattaaacaaaaaaataaccctaagccgaccaagcagagtagtttttaaaataattttaagat  
aacaacaaaatgagataatactactagacaatgacaactcaactaccaattgagttatggagctaccaactccaatcgggtcaactgattaagt  
atctgtagttataataatattgctatcaattttagcatcttaacaatattattatacactaagctaaaattattcaatagttgtaaagttgattagtagtcaat  
aagtataatattatgtagttatcttataaaaaactagataaggagataataaatataggaacaattagattcaaaatataagttgaaaaatctt  
aatggcagtagtttagagatggtaggacaaggaaataatcttattgataatgaatgtagtagtagttcaaaataataaaagtaatagtaaaacaatt  
agaactcggagaagaatttaagaatatagtaaaacaacttttttaaaaatagatgatagtagaattaccttcgcaaaaaatatttattatgaa  
aatacatttttaacatgtagtactactgatggaagcaggaaccaatgaaaacttaataaatagatagcattaggatttgattttgacaaaaaagaa  
ttaggacaaggtttaattataaagatataattaattttactaagataggattacattatcatalcctagttgatagtggaatggattccatgtttatgtg  
ctaattaataaaactaataacattaagtttagatcagaagttacaaatacattaataaataaattgggtgcagataaacaagcaaatatctactcaa  
gtattaagagtagcttatacatataatataaaaaactactaaacaagtaaaaaataacaccaagcaaaaaatataatagatagcatagaaa  
agttagctaaaaaattgcaaagatgtaaaaacagtaggtaataactaatacaaaatataatattagatagtagtaagctaccaaatgtatagtagatatt

taaaaaatggtagtaaatggacataaaaacctagattgcaaaaaatagttgtgactttaagattgaggaataaaaagttaagcaagtaatac  
cgttgctagagaatggaactatatacacaaaatagctttcaaatagtgagctagaatatcaagcaagtatatgtatgagaaactaaaacggtta  
atlttggtgactggttgagtttaatagtgattgttgaataaaaatagaatcagattttatataatagtgatgaagatactttgtcaatatgccacataag  
cactcaaaggattgaaatataagaataggaaaggggttaaataatgactggtaaatcaattgtttatctataatgtgttacttaacaataaagataga  
gaattaaacatagacgatataatggagctgataacctataaacgtaagaagaaagttaaaaaactgttatgagtgaaaagacattaagagaaa  
cattaaagaactcaacataatgattatattacaaaaacaaaagggttacaaagctaggaataaaaagatacacaatgtaaagaagttagat  
gtaatatagataaacaataactattagttactttgtaccatggcagtaattggggaataattcaactgaagaattaagattatatactcacatgagat  
ataagcaagatttattgtgcaaatgataaaaataaaaggaaatataaagaattaatcaagaggaattagcaaaagatttaggagtaacacag  
caaagaattcaaatatgatagaatctttattagataactaaaatttagatgtatgggaaactaaaataaatgatagaggatttatgtactatacatatag  
attaacaagtagattttgataggattagaattgattttctagctctattttatgcaaaaaactaattaataaaaattcttttgtaaataattgtacga  
gaattgcaaaaaaaaaatggcatcaaagtattgaaattaagccgttttaaaaattcttttgtaaataattctacatatatagtagtatatataat  
gttttttagagaatgtataactagaatatagagctagaatatagagaatgtataactagaatatagagctagaatatagagaatgtataactagaat  
agagctagaatatagagaatgtataactagaatatagagctagaatatagagaatgtataactagaatatagagctagaatatagagaatgtataa  
ctagaatatagagctagaatatagagaatgtataactagaatatagagctagaatcctaattagtaggtgctttttaaaacaagttaaaaatcaaaa  
atagtattagtaagcattggaaatgctagattctaaaatagaaaagtaaaaaattggtgcaactatctaaactatctatacgtttttccgctggttgctc  
tctagttacgatacaggggatgcttattgagttatagtaactaatcagtgcttaatatagtttaataaaaattatagttaccatagtttagtaactatgatg  
atgtagttagaaactgcatttcggccggccagtgggcaagttg

D. pIM13 (*B. subtilis*)

gaatggcgaatggcgctagcataaaaaataagaagcctgcatttgcaggcttctattttatggcgcgcccgattcacttctttctatataaataatgagc  
gaagcgaataagcgtcggaagcagcaaaaagtttcttttctgtgtggagcatgggggttcaggggtgagcagatctgacgtcaatgccgagc  
gaaagcgagccgaaggtagcatttacgttagataaccccctgatagctccgacgctttatagaaaagaagattcaactaggtaaaatcttaat  
ataggttgagatgataagggttataaggaattgtttgttctaattttctactcattttgttctaatttcttaacaaatgttcttttttttagaacggtatgatata  
gttagaatagtttaaaaataaggagtgagaaaaagatgaaagaagatatggaacagctctataaaggctctcagaggctcatagacgaagaaag  
tggagaagtcataaggttagacaagttataaccgtaacaaacgtctgtaacttcgtaaaggcatatataatgcaattaataagtagtttagatgata  
ttggcggaaaaaactaaaatcgtaactatcttagataatgtccacttaagtaacaatacaatgatagctacaacaagagaaaatgcaaaaag  
ctacaggaacaagctacaacagtaataacaacactaaaatcttagaagaaggaaatattataaaaagaaaaactggagttataatgttaaac  
cctgaactactaatgagagggcagcaccataaaaacaaaataaccttactcgaattgggaactttgagcaagaggcaaatgaaatagattgac  
ctccaataacaccacgtagttattgggaggtcaatctatgaaatgagattaaggccggccagtgggcaagttg

E. Cthem-based rep origin (*C. thermocellum*)

gaatggcgaatggcgctagcataaaaaataagaagcctgcatttgcaggcttctattttatggcgcgcccctgattctgtggataaccgtattaccgc  
ctttgagtgagctgataaccgctcgccgagccgaacgaccgagcagcagcagtcagtgagcaggaagcgggaagagcggccaatacgcaaa  
ccgcctctccccgcgctggccgattcattatgagcagtgaggaaacaaaatattgctatgagcagctgttcacatggacgagaaaaccctcacat  
gcatttaggagttgttctatgagcctagagggctttctgctgctcagcatgagcagcgaagaaaagaagaataacttttctgctcaagatgttttgc

agcgtgatcgagaacttcgtgagcaaagaaaagcaaagaggaaaaaatcgcatgattggagcgataagaaaaagcactcgaatgagtgctt  
tttgcgttttgagcgtagcgaaaaacgagttcttctattcttgatacatatagaaataacgtcattttattttagttgctgaaaggtgctggaagtgttggt  
atgtatgtgttttaagtattgaaaacccctaaaattggtgacagaaaaacccccatctgtaaagttataagtgaccaacaataactaaatagat  
gggggtttctttaatattatgtgtcctaatagttagcatttattcagatgaaaaatcaagggtttagtggaagacaaaaagtgaaaaagtgagacc  
atggagagaaaaagaaaaatcgctaattgtgattactttgaactctgcatattctgaatttaaaaaggctgaaagagtaaaagattgtgctgaaatatt  
agagtataaacaataatcgtaaacaggcgaaagaaagttgatcgagtggtgtttgtaaatccaggctttgtccaatgtgcaactggaggagagc  
aatgaaacatggcattcagtcacaaaaggtgtgtgctgaagttattaacaaaagccaacagttcgttggtgtttctcacattaacagttaaaaatgttt  
atgatggcgaagaattaataagagttgtcagatattggctcaaggatttcgccgaatgatgcaatataaaaaaataataaaaaatctgttggtttat  
gctgcaacggaagtgacaataaataaagataattcttataatcagcacatgcatgtattggtatgtgtggaaccaactattttaagaatacag  
aaaactacgtgaatcaaaaaacaatggattcaatttgaaaaaggcaatgaaattagactatgatccaaatgtaaaagttcaaatgattcgaccga  
aaaaataatataaatcggatatacaatcggcaattgacgaaactgcaaaatctctgtaaaggatcggattttatgaccgatgatgaagaaaag  
aatttgaacgttgtctgattggaggaaggttacaccgtaaaaggttaatctcctatggtggtttgtaaaagaaatacataaaaaaataaaccttga  
tgacacagaagaaggcattgattcatacagatgatgacgaaaaagccgatgaagatggattttctattattgcaatgtggaattgggaacggaa  
aaattatttataaagagtagttcaacaacgggattgacttttaaaaaaggattgattctaataagaaagcagacaagtaagcctcctaaattca  
cttagataaaaatttaggagcagatcaaatgaacggcggccagtgggcaagttg

F. pAM $\beta$ 1-based (*E. faecalis*)

gaatggcgaatggcgtagcataaaaaataagaagcctgcatttcaggcttcttattttatggcgcgccctcacgtaagggattttggtcatgagatt  
atcaaaaaggatcttcacctagatccttttaaaatataaaatgaagtttaaatcaatctaaagtataatagtaaacttggtctgacagttaccaatgctt  
aatcagtgaggcacctatctcagcgtatctgtctatttcgttcatccatagttgcctgactccccgctgtagataactacgatacgggagggcttacca  
tctggccccagtgctgcaatgataccgagaccacgctcaccggctccagattatcagcaataaaccagccagccggaagggccgagcgc  
agaagtggtcctatttaacactttgactagcaaaactaacaacaagacacacacacacaaaaatcaaaaattcactacttttagttaaaccacg  
taaccacaagaactaatccaatccatgtaatcgggttctcaaatatttctcaagatttctcctctaataatgctcaactaaatgacctattcaataat  
ctattatgctgctaaatagtttataggacaaataagtatactctaatagacctataaaagatagaaaatataaaaaatcaagtggtcgtctcactg  
cccccgacgttttagtagcctttccctcactcgttcagccaagccaactaaaagtttcgggctactctccttctccccctaaataataataaaatctt  
actctgtatattctgctaatactcgttaaacagcaagaaaaacaacacgatatcatagataaaatgtaatggcatagtgccgggtttatctcag  
cctgtatcatagctaaacaatcgagttgtgtccgttttagggcgttctgtagctgttaaaagtctctgaaatgaaatgcttaagtcaaaagaat  
ttgtcagcgcctttatagcttcttttctttttactttaatgatcgatagcaacaatgatttaacactagcaagttgaaatgcccaccatttctcctggtt  
aatctaaagaaaatttctgattcgccttcagtaacctcagcaatttatctaatagtccgttcaggaatgcttagcactctctaatactctttttggtcgtcact  
aaataaggctgtatacatcgctttttcgttaataagccattaaatcttcttccattctgacaaatgaacacgttgacgttcgcttctttttctgaattta  
aaccaccctgacggacaaataaatctttactggtaaatcacttgataccaagctttgcaaagaatggtaatgtattccctattagccccttgatagtt  
ttctgaataggcacttcaacaattttgattacttcttttcttaagggttgatctaatacattataaactcaaacatattatctgcacggttcgattgaat  
agcctgaaactaaagtaggctaaagagagggtaaacatgacgttattacgcctataaaccctttctcctgaaaaattcgtttcgtgcaataagagat  
taaaccagggttcatctactgtttttgccttctgtaccgcttaaaaccgtagactgaaacgagtaagcccttattatctgtttgtgaaagaccaatctt  
gccattcttgaaagaataacggtaattaggatcaaaaaattctacattgtccgttctggtatgagcaatacaaaaatgattacaggttagatcaa



ctggcaaagactttccaaaatattctcggatattttgCGaaattattttggctgcttgacagatttaaattctgattttgaagtcacatagactggcgttcta  
aaacaaaatagcttgataacctttatcagatttgataatcatagtaggcataaaacctaaatcaatagcgggtgttaaaatcgcttgctgaaatag  
ttcttttgcggtggaatatcaaaatcaataaagaaggattgattgtcttaaattgtttcagaatgctcttctggtatgaacggtttctgctgcatacgtt  
catacagataaacggtgggtgtccaatgtgtaaagtatcttgattttctgaaatcgcttctcgggaagtcagaacaacaccacgaccgccaatcatgc  
ttgattttgagcgatacgcacaaaatagcccctttgctttacctggcttgtagtgattgagcgaattttactattttaaaattgactttaacaagccgcat  
gaagcacagtttctacaacaaaaggatattcattcagctgttctctttctataaaatcctataaaataggtgttaattaactggtttgcttttcttca  
actgtttcaatattgcatgtttgaaaagatttttctttataagtcaatttttccactaatcgaataaaattttgtattttctattaacttatataataatc  
tccccctccgaagaaaaatacttatctgattttgttctaagtagatatttcttttctaactcttctaaacgtttctagtgatagatattgctaattttctatc  
tccaataaactatttttatataagttttacattcatcatgattcatacaaaactccaccttctataaatgaatacaaaaaaagcaatcaaacgatttccgatt  
gattgcttaacaattctaaattcagtagcttagatactgaaaactctgatttccctatataatgatagtagcggttatataccgttctcaacaaagtta  
attaaataacttcttacgaggggaagagttcatctgactaaactgataagcgttggttgcaatcttatcgggctatgcatttataaaatgctgcaaacatt  
ttataaatgtgcatggctcttttctgttctattcagttcgttctgttataatctagatataccgcttttaaaaaaaataagcaacgatttctgctcatttca  
cacgaagtcattgcttttcttctcatttctaaatccaatgttactgttctgattctgttctggttctggttctgttggtcatttgggataaatccactacta  
gcgttgagttagttacttgaattgttctagtgttttatggttgatctgattttctggttccggccagtgggcaagttg

G. pWV01-based (*L. lactis*)

gaatggcgaatggcgtagcataaaaaataagaagcctgcatttgcaggcttctattttatggcgcgcccagcgaagatggtgctgtagattatg  
aaagccgatgactgaatgaaataaagcgcagcgccttctatttccggttgaggaggctcaagggagtagagggaatgaaattccctcatgg  
gtttgattttaaaaatgctgcaattttgccgagcggtagcgtggaaaattttgaaaaaatttgaatttgaaaaaaatgggggaaaggaag  
cgaattttgctccgtactacgacccccattaagtgcgagtgccaattttgtgcaaaaacgctctatccaactggctcaaggtttaaggggttt  
tcaatcgccaacgaatcgccaacgttttcgccaacgttttataaatctatattaagtagcttattgtttttatgattacaaagtatacactaacttta  
taaaattattgattggagtttttaaatggtgattcagaatcgaaaaaaagagttatgatttctgacaaaagagcaagataaaaaattaacagata  
tggcgaacaaaaaggttttcaaaatctgCGgttgcggcgttagctatagaagaatgcaagaaggaatcagaacaaaaaaataagcga  
aagctcgcgtttttagaaggatacagagtttctgactgttttgataaggtaattatcatggctattaaaaatacactaaagctagaaattttgatttttatt  
atatcctgactcaattcctaattgattgaaagaaaaatagagagtttggcgtatctatggctgctcagtcctttacagatattgacgaaaaaaag  
ataaagatacatggaatagtagtgattatcgaatggaaagcactataaaaaaccacactatcacgttatataattgcacgaaatcctgtaac  
aatagaaagcgttaggaacaagattaagcgaaaattggggaatagttcagttgctcatgttgagatactgattatatcaaaggtcatatgaatatt  
gactcatgaatcaaaggacgctattgctaagaataaacatatacgcacaaaaaagatattttgaacattaatgattttgatattgaccgctatataac  
actgatgaaagccaaaaaagagaattgaagaatttacttttagatatagtgatgactataatttgtaaatacaaaaagatttaattgcttttattcgc  
ttaggggagcggagtttgaatttttaatacgaatgatgtaaaagatattgtttcaacaaactctagcgcctttagattatggtttgagggcaattatcag  
tgtggatatagagcaagttatgcaaaggttcttgatgctgaaacgggggaaataaaatgacaaacaaagaaaaagagttatttctgaaaatgag  
gaattaaaaaagaaattaaggacttaaagagcgtattgaaagatacagagaaatggaagttgaattaagtacaacaatagatttattgagag  
agggattattgaaataaaagccccctgacgaaagtcgaaggggggttttattttggtttagttgctgattaatagcaatacaagggcggccagt  
gggcaagttg

H. pMB1 (*B. longum*)

gaatggcgaatggcgctagc ataaaaataagaagcctgcattgcaggcttctatTTTTatggcgcgccccgaggcctcagcctgcggaacgc  
gcagcggacgccgacggctcagacggctcagaaacgtccgtgagtgccctccacgcggccgaacaggtcaggaggctcgcgcatacgtga  
gCGGCGTGGAGAAGCGGCTGAAGGCCGTCCAGCGGCTTTCTGTCAGGATGTGCTGGGCTGGGTTAGCCGACGCTTCGCTGGGCTGAAATCTG  
actggttcccgcgtattgttactgtacaaatacgtatgtatgctgtagccatgtccgatgagttcgcagccgacgcttgagctgtcgcgcacgttcg  
aaggctggtggctgcccgaacgccgctgtgctgcgacgacgactactcccgctgcaccgaggagccgcgccgacgcgctcaaatgcaag  
cacatcgaggcgaacccccgccgctggtgaacacgatcgtggtggacatcgacgacgcgaacccaaggcgtggccctgtgggagcacg  
agggcatgcggccgaactggatcgcggagaacccggccaacgggcacgctcacgcgggctgggtgctcaccttccggtgcccagaaccgat  
ctggcgcgtctcaagccgttgaagctcctgcacgccaccacggaggactgcgcccctctgcagcggggacatgggctattcgggacttctgat  
gaagaaccccgagcatccggcgtgggctcggacatcatcgagtgggacacctacgacctggaacagctcgtgcagtcgctccaggaacacg  
gggacatgccgcccgcagctggaagcgcaccaagcgcgcccgcacgcaggggctgggacgcaactgcacgctcttcgacaaggccccgcac  
gctcgcctaccgctacgttgcggcggtgccgaccgttcggaggccagcagcgaggcattgcgcctatacgtgcgtcgcacctgccagcaactca  
acgtctcgtgttccccgatccgctgcacgcgcgtgaggtcggagacatcgccaagagcatccacaaatggatcgtcacccgcagccgatgtg  
gcgcgacgggtgccattgccaacgcagccacattcatcgccatccaatccgcacgaggacacaaacacggtgagaacaaatcagcaggatca  
gaaggaggcactggaatggaaggacgactttgaggaagaagcggcgtgtcgcacgtgaattagctgaagcatacggcgtctccacgcgc  
accattcagagctgggtgcaatgaagcgcgaggattggattgatgaacaagccgctatgcgcgaagcagtcctcatatcacgatgacgagg  
gccatacatggccgcagaccgccgagcattcaacatgagccaggggtccgtgcgtcaacgctgctacagggctcgaaggagcgcgaggac  
gaggcggcggagaaatcgaagcatctaccggcgagattcactgttcgactgacgctaaacgttgcctcaaacgcgaacgcagcacctccctc  
gccttgcggcttttctcttccatcggccttcggcactcgggttgtctccagcgcgcgaggcgcgggaggctgcggc cggccagtgggcaagtt  
g

I. pIP404-based (*C. perfringens*)

gaatggcgaatggcgctagc ataaaaataagaagcctgcattgcaggcttctatTTTTatggcgcgccccgaagaacgtttccaatgatgagcac  
ttttaaataaaaatgaagttttaaacttcatTTTTaatttaaataaaaatgaagttttatcaaaaaatttccaataatcccactctaagccacaaacac  
gccctataaaaatcccgtttaaatacccactttgagacacatgtaataactttacgccctagtagtgataatTTTTacattcaatgccacgcaaaaaa  
ataaagggcactataataaaaagttccttcggaactaactaaagtaaaaaattatctttacaacctccccaaaaaaaaaagaacaggtacaaagtac  
cctataatacaagcgtaaaaaatgagggtaaaaataaaaaataaaaaataaaaaataaaaaataaaaaataaaaaataaaaaataaaaaat  
aaaaataaaaaataaaaaataaaaaataaaaaataaaaaataaaaaataaaaaataaaaaataaaaaataaaaaataaaaaataaaaaat  
aaaaataaaaaataaaaaataaaaaataaaaaataaaaaataaaaaataaaaaataaaaaataaaaaataaaaaataaaaaataaaaaat  
attatataatctttgaagaaaagaataaaaaatgagcctttataaaagccattttttcatatacgtaatatgacgttctaattttttattggtacttcta  
acattagagtaatttcttatttttaagccttttcttaagggctttattttttcttaatacatttaattcctctttttgttctttcttttagcttttaattgctctga  
taatttttttacctctaataatttctctcttataattccttttagaaattattattgctatatttttgttctctctgtaatttctaataactctataagagtttcttct  
tatacttattgcttattttatctaaataacatcttcagcacttctagttgctcttataacttctttcacttaaattgttctaaacatactattaagttctaaa  
acatcatttaatgccttctcaatgctctctgtaaagctacaaagataatatctataaaaaataataagctctctgtgctcttttaaatcatattctcttagtt  
caciaagttttattatgcttcttccataataaacttcttctataaatataattattttgcttggctacccttttcttctcatatggttttaattcaggt  
aaaaatccattttgatttctcttaagtcataaatatattcgtactcatctaatatattgactactgtttttgatttagagtttatacttctggaactcttaattct

ggttgcatctaaggctgtctatctgctccaaagtatfttaattgattatataaatattcttgaaccgcttccataatggtaatgctttactaggtactgcatt  
attatccatataaatacattcctctccactatctattacatagtttggtataggaatactttgattaaaataattcttttctaagtcattaatacctggtcttta  
gttttgccagttttataataatccaagtctataaacagtgatfttaactcttttatatttttaaatcgctacacggcttataaaagggtatttagagttatagat  
atfttcatcactcatatctaaatctfttaattcagcgtatfttatagtgccattggctatatacctftttatctataacgctcctggtatccacccttacttctactat  
gaatattatctatagttctftttatcagctfttaatgcggtttctcacttattcacctcccctctgtaaaaactaagaaaattatatacatatfttcaataattattaa  
ctattcttaaactcttaataaaaaatagagtaagtcaccaattgaaacttaactatfttttatgtttaatttattatttttataaaaatftttaaactaaattaa  
tgattctfttttaatttttactatfttcattccataatatattactataattatttacaataatatttcttcatttgaatatttagatgattactaattttagttttatatt  
aaataaattaatgtataatfttatataaaaaatcaaaggagctataaattatgattatfttccaaagataactaaagatttaatttttcaatttaacaatactfttt  
gtaatattatgtttaatttaattgtatfttttcatataataaagccgtgaagtaaaccaatccatttctctatgatgggc**cgccagtgcccaagttg**

## 2. Plasmid series pGM-ABCM to pGM-IBCM. One representative GenBank document is shown.

LOCUS pGM-ABCM 6151 bp DNA circular 15-MAY-2019

DEFINITION Shuttle vector pMTL82151. clostron.com.

ACCESSION urn.local...c-agz6tx3

KEYWORDS .

SOURCE null

ORGANISM

REFERENCE 1 (bases 1 to 5254)

AUTHORS Heap,J.T., Pennington,O.J., Cartman,S.T. and Minton,N.P.

TITLE A modular system for Clostridium shuttle plasmids

JOURNAL Journal of Microbiological Methods (2009) 78(1) 79-85

PUBMED 19445976

FEATURES Location/Qualifiers

terminator 9..62

/gene="CD0164 terminator"

primer\_bind 63..80

/gene="M13R"

misc\_feature 81..977

/note="Geneious type: Editing History Insertion"

source order(949..>977,<81..948)

/organism="synthetic DNA construct"

/mol\_type="other DNA"

primer\_bind complement(83..106)

/note="pEx-lin-R"

```

/note="ApEinfo_fwdcolor=#ff0000 ApEinfo_revcolor=#ffff80
ApEinfo_graphicformat=arrow_data {{0 1 2 0 0 -1} {} 0}
width 5 offset 0"
protein_bind 84..89
/note="Sall"
/note="ApEinfo_fwdcolor=#b0ffb0 ApEinfo_revcolor=#009300
ApEinfo_graphicformat=arrow_data {{0 1 2 0 0 -1} {} 0}
width 5 offset 0"
protein_bind 84..89
/note="Sall(1)"
/note="ApEinfo_fwdcolor=#800080 ApEinfo_label=Sall
ApEinfo_revcolor=#009300 ApEinfo_graphicformat=arrow_data
{{0 1 2 0 0 -1} {} 0} width 5 offset 0"
misc_feature 94..99
/note="IR"
/note="ApEinfo_fwdcolor=cyan ApEinfo_revcolor=green
ApEinfo_graphicformat=arrow_data {{0 1 2 0 0 -1} {} 0}
width 5 offset 0"
misc_binding 105..110
/note="EcoRV"
/note="ApEinfo_fwdcolor=#8000ff ApEinfo_revcolor=#b3ffff
ApEinfo_graphicformat=arrow_data {{0 1 2 0 0 -1} {} 0}
width 5 offset 0"
misc_feature complement(107..111)
/note="IR(1)"
/note="ApEinfo_fwdcolor=cyan ApEinfo_label=IR
ApEinfo_revcolor=green ApEinfo_graphicformat=arrow_data
{{0 1 2 0 0 -1} {} 0} width 5 offset 0"
primer_bind 112..137
/note="pEx-lin-F"
/note="ApEinfo_fwdcolor=#ff0000 ApEinfo_revcolor=#ffff80
ApEinfo_graphicformat=arrow_data {{0 1 2 0 0 -1} {} 0}
width 5 offset 0"
misc_binding 117..122
/note="PstI"

```

```

        /note="ApEinfo_fwdcolor=#c4ffff ApEinfo_revcolor=#b3ffff
        ApEinfo_graphicformat=arrow_data {{0 1 2 0 0 -1} {} 0}
        width 5 offset 0"
misc_binding 123..128
        /note="Smal or Xmal"
        /note="ApEinfo_fwdcolor=#ecffec ApEinfo_revcolor=#b3ffff
        ApEinfo_graphicformat=arrow_data {{0 1 2 0 0 -1} {} 0}
        width 5 offset 0"
misc_binding 129..134
        /note="BamHI"
        /note="ApEinfo_fwdcolor=#ff0000 ApEinfo_revcolor=#b3ffff
        ApEinfo_graphicformat=arrow_data {{0 1 2 0 0 -1} {} 0}
        width 5 offset 0"
misc_binding 135..140
        /note="SpeI"
        /note="ApEinfo_fwdcolor=#408080 ApEinfo_revcolor=#b3ffff
        ApEinfo_graphicformat=arrow_data {{0 1 2 0 0 -1} {} 0}
        width 5 offset 0"
misc_binding 141..146
        /note="XbaI"
        /note="ApEinfo_fwdcolor=#ff80ff ApEinfo_revcolor=#b3ffff
        ApEinfo_graphicformat=arrow_data {{0 1 2 0 0 -1} {} 0}
        width 5 offset 0"
misc_binding 147..154
        /note="NotI"
        /note="ApEinfo_fwdcolor=#ffe1e1 ApEinfo_revcolor=#b3ffff
        ApEinfo_graphicformat=arrow_data {{0 1 2 0 0 -1} {} 0}
        width 5 offset 0"
rep_origin 148..948
primer_bind complement(265..286)
        /note="pEx-SRV"
        /note="ApEinfo_fwdcolor=#ff8080 ApEinfo_revcolor=#00ff80
        ApEinfo_graphicformat=arrow_data {{0 1 2 0 0 -1} {} 0}
        width 5 offset 0"
primer_bind complement(340..362)

```

/note="pEx-CHR"  
/note="ApEinfo\_fwdcolor=#ff0080 ApEinfo\_revcolor=#ccffcc  
ApEinfo\_graphicformat=arrow\_data {{0 1 2 0 0 -1} {} 0}  
width 5 offset 0"

misc\_feature 948..949

/note="Geneious type: origin"

CDS 995..1258

/gene="lacZ alpha"

primer\_bind complement(1096..1113)

/gene="M13F"

terminator 1260..1301

/gene="Cpa fdx terminator"

CDS 1822..2877

/gene="repA"

CDS complement(2968..3471)

/gene="orf2"

CDS 3795..4418

/gene="catP"

rep\_origin 4631..5176

CDS 5577..6017

/gene="traJ"

## ORIGIN

1 cctgcaggat aaaaaaattg tagataaatt ttataaata gtttatcta caatttttt  
61 atcaggaaac agctatgacc cgagtcgacg gtatcgataa gcttgatc gaattcctgc  
121 agcccggggg atccactagt tctagagcgg cgcaccgc ggtggagggg aattccatg  
181 tcagccgta agtgttctg tgcactcaa aattgcttg agaggctcta agggcttctc  
241 agtgcgttac atccctggct tgtgtccac aaccgttaa cctaaaagc ttaaaagcc  
301 ttatatattc ttttttct tataaaactt aaaaccttag aggctattta agttgctgat  
361 ttatattaat ttattgtc aaacatgaga gcttagtacg tgaacatga gagcttagta  
421 cgtagccat gagagcttag tacgtagcc atgagggttt agttcgtaa acatgagagc  
481 ttagtacgtt aaacatgaga gcttagtacg tgaacatga gagcttagta cgtactatca  
541 acaggttgaa ctgctgatct tcagatcctc tacgccggac gcatcgtggc cggatcaatt  
601 ccgtttccg ctgcataacc ctgctcggg gtcattatag cgatttttc ggtatatcca  
661 tccttttcg cacgatatac aggatttgc caaagggtc gtgtagactt tccttggtg  
721 atccaacggc gtcagccggg caggataggt gaagtaggcc caccgcgag cgggtgttcc

781 ttcttctactg tccttattc gcacctggcg gtgctcaacg ggaatcctgc tctgagaggc  
841 tggccggcta ccgccggcgt aacagatgag ggcaagcggg tggctgatga aaccaagcca  
901 accaggaagg gcagcccacc taccacggaa ttgatcccc tcgaattgac gcgttatgag  
961 taaacttggc ctgacaggcg gccgctgtat ccatatgacc atgattacga attcgagctc  
1021 ggtacctggg gatcctctag agtcgacgtc acgctgcat ggagatctcg aggcctgag  
1081 acatgcaagc ttggcactgg ccgctgtttt acaacgtcgt gactgggaaa accctggcgt  
1141 tacccaactt aatgccttg cagcacatcc cccttcgcc agctggcgta atagcgaaga  
1201 ggcccgacc gatcgccctt cccaacagtt gcgagcctg aatggcgaat ggcgctagca  
1261 taaaaataag aagcctgcat ttgaggctt cttatttta tggcgcgccg ttctgaatcc  
1321 ttagctaatg gttcaacagg taactatgac gaagatagca ccctggataa gtctgtaatg  
1381 gattctaagg catttaatga agacgtgtat ataaaatgtg ctaatgaaaa agaaaatgag  
1441 taaaagagc ctaaaatgag ttcaaatggt ttgaaattg attgtagtt taatttaata  
1501 ttttttct attggctatc tcgataccta tagaatctc tgttacttt tgttttgaa  
1561 atataaaaag gggctttta gcccttttt ttaaaactc cggaggagt tcttattct  
1621 tgatactata cgtaactatt ttcgattga cttcattgtc aattaagcta gtaaaatcaa  
1681 tggtaaaaa acaaaaaact tgcattttc tacctagtaa ttataattt taagtgtcga  
1741 gtttaaaagt ataatttacc aggaaaggag caagttttt aataaggaaa aatttttct  
1801 ttaaaattc tatttcgta tatgactaat tataatcaaa aaaatgaaaa taaacaagag  
1861 gtaaaaactg cttagagaa atgtactgat aaaaaagaa aaaatcctag atttactca  
1921 tacatagcac cttaactac taagaaaaat attgaaagga cttccactg tggagattat  
1981 ttgttatgt tgagtgatgc agacttagaa cattttaat tacataaagg taattttgc  
2041 ggtaatagat ttgtccaat gtgtagtgg cgacttgctt gtaaggatag tttagaata  
2101 tctattctta tggagcattt aagaaaagaa gaaaataaag agtttatatt ttaactctt  
2161 acaactccaa atgtaaaaag ttatgatctt aattattcta ttaacaata taataaatct  
2221 ttaaaaaat taatggagcg taaggaagtt aaggatataa ctaaaggta tataagaaaa  
2281 ttagaagtaa ctacaaaaa ggaaaaatac ataacaagg atttatggaa aataaaaaa  
2341 gattattatc aaaaaaagg actgaaatt ggtgatttag aacctaatt tgatactat  
2401 aatcctcatt ttcatgtagt tattgcagtt aataaaagt atttacaga taaaaattat  
2461 tatataatc gagaaagatg gttggaatta tggaaagttg ctactaagga tgattctata  
2521 actcaagttg atgttagaaa agcaaaaatt aatgattata aagaggttta cgaactgag  
2581 aaatattcag ctaaagacac tgattatta atatcgaggc cagtattga aatttttat  
2641 aagcattaa aaggcaagca ggtattagtt ttagtggtat ttttaaga tgacacaaa  
2701 ttgtacaagc aaggaaaact tgatgtttat aaaaagaaag atgaaattaa atatgtctat  
2761 atagttatt ataattggtg caaaaaaca tatgaaaaa ctagaataag ggaacttgc  
2821 gaagatgaaa aagaagaatt aatcaagat ttaatagatg aatagaat agattaaagt

2881 gtaactatac ttatatata tatgattaa aaaataaaaa acaacagcct attaggtgt  
2941 tgtttttat tttcttatt aatttttta attttagtt ttagttctt ttttaaata  
3001 agttcagcc tcttttcaa tatttttaa agaaggagta tttgcatgaa ttgcctttt  
3061 tctaacagac ttaggaaata ttttaacagt atcttctgc gccggtgatt ttggaactc  
3121 ataacttact aatttataat tattatttc tttttaatt gtaacagttg caaaagaagc  
3181 tgaacctgtt ccttcaacta gtttatcatc ttcaatataa tattcttgac ctatatagta  
3241 taaatatatt ttattatat tttactttt tctgaaatc attattttat aatcataaaa  
3301 agttttacca ccaaagaag gttgtactcc tctggtcca acatattttt ttactatatt  
3361 atctaaataa ttttgggaa ctggtgtgt aatttgatta atcgaacaac cagttatact  
3421 taaaggaatt ataactataa aatatatag gattatcttt ttaaatttca ttattggcct  
3481 cctttttatt aaatttatgt taccataaaa aggacataac gggaatatgt agaattttt  
3541 taatgtagac aaaattttac ataaatataa agaaaggaag tgtttgtta aattttatag  
3601 caaactatca aaaattaggg ggataaaaat ttatgaaaaa aaggttttcg atgtatttt  
3661 tatgtttaac ttaatatgt tgggtttat ttacaaattc ggccggccag tgggcaagtt  
3721 gaaaaattca caaaaatgtg gtataatc tttgttcatt agagcgataa actgaattt  
3781 gagaggggaa ttagatggtt ttgaaaaaa ttgataaaaa tagttggaac agaaaagagt  
3841 attttgacca ctacttgca agtgactct gtacctacag catgaccgtt aaagtggata  
3901 tcacacaaat aaaggaaaag ggaatgaaac tatatctgc aatgctttat tatattgcaa  
3961 tgattgtaa cgccttca gagtttagga cggcaatcaa tcaagatggt gaattgggga  
4021 tatatgatga gatgataca agctatacaa ttttcacaa tgatactgaa acattttcca  
4081 gccttggac tgagtgaag tctgacttta aatcatttt agcagattat gaaagtgata  
4141 cgcaacggta tggaaacaat catagaatgg aaggaaagcc aatgctccg gaaaacattt  
4201 ttaatgtatc tatgataccg tggtaacct tcatggtt taatctgaat ttgcagaaaag  
4261 gatatgatta tttgattcct atttttacta tggggaaata ttataaagaa gatacaaaaa  
4321 ttatactcc tttggcaatt caagttcatc acgcagtatg tgacggattt cacattgccc  
4381 gttttgtaa cgaattgcag gaattgataa atagttaact tcaggtttgt ctgtaactaa  
4441 aaacaagat ttaagcaaaa acatcgtaga aatcgggtt tttttgtac cctaagttta  
4501 aactcctttt tgataatctc atgacaaaaa tccctaacg tgagttttcg ttccactgag  
4561 cgtcagacct cgtagaaaag atcaaaggat ctcttgaga tcttttttt ctgocgtaa  
4621 tctgctgctt gcaaacaaaa aaaccaccgc taccagcgtt gttttgttg ccgatcaag  
4681 agctaccaac tcttttccg aaggtaactg gctcagcag agcgcagata ccaatactg  
4741 ttcttctagt gtagccgtag ttaggccacc acttcaagaa ctctgtagca ccgcctacat  
4801 acctcgtct gctaactctg ttaccagtgg ctgctgccag tggcgataag tctgtctta  
4861 ccgggttga ctcaagacga tagttaccgg ataaggcgca gcggtcgggc tgaacggggg  
4921 gttcgtgcac acagcccagc ttggagcgaa cgacctacac cgaactgaga tacctacagc



4981 gtgagctatg agaaagcgcc acgcttcccg aagggagaaa ggcggacagg tatccggtaa  
5041 gcggcagggg cggaacagga gagcgcacga gggagcttcc agggggaaac gcctggatc  
5101 ttatagtc tgctgggtt cgccacct gacttgagcg tcgattttg tgatgctcgt  
5161 caggggggcg gagcctatgg aaaaacgcca gcaacgcggc cttttacgg ttctggcct  
5221 tttgctggcc tttgctcac atgttcttc ctgcttacc ccctgattct gtggataacc  
5281 gtattaccgc cttgagtg gctgataccg ctgcccag ccgaacgacc gagcgcagcg  
5341 agtcagtgag cgaggaagcg gaagagcgcc caatacgcag ggccccctgc ttcggggtca  
5401 ttatagcgat ttttcggtatccatcct ttttcgcacg atatacagga tttgcaaaa  
5461 gggttcgtgt agactttct tgggtatcc aacggcgta gccgggcagg ataggtgaag  
5521 taggcccacc cgcgagcggg ttttcttct tcaactgtcc ttattgcac ctggcggtc  
5581 tcaacgggaa tctgctctg cgaggctggc cggctaccgc cggcgtaaca gatgagggca  
5641 agcggatggc tgatgaaacc aagccaacca ggaagggcag cccacctatc aaggtgtact  
5701 gccttcaga cgaacgaaga gcgattgagg aaaagggcggc ggcggccggc atgagcctgt  
5761 cggctacct gctggccgct ggccagggt acaaaatcac gggcgtcgtg gactatgagc  
5821 acgtccgca gctggcccgc atcaatggcg acctgggccc cctgggccc ctgctgaaac  
5881 tctggctcac cgacgaccg cgcacggcgc ggttcggtga tgccacgac ctcgccctgc  
5941 tggcgaagat cgaagagaag caggacgagc ttggcaagg catgatgggc gtgtccgac  
6001 cgagggcaga gccatgactt ttttagccgc taaaacggcc ggggggtgcg cgtgattgc  
6061 aagcacgtcc ccatgctc catcaagaag agcgactcg cggagctgtt gaagtacac  
6121 accgacgagc aaggcaagac cgatcgggcc c

//

**3. Plasmid series pGM-ABCL to pGM-IBCL.** One representative GenBank document is shown.

LOCUS pGM-ABCL 9717 bp ds-DNA circular SYN 06-2?-2020  
DEFINITION .  
ACCESSION .  
VERSION .  
KEYWORDS pMTL82153\_lacza\_dcpf-1  
SOURCE synthetic DNA construct  
ORGANISM synthetic DNA construct  
REFERENCE 1 (bases 1 to 9717)  
AUTHORS Itt  
TITLE Direct Submission  
JOURNAL Exported 2021?10?28? from SnapGene 2.3.2  
<http://www.snapgene.com>

FEATURES            Location/Qualifiers

source            1..9717  
                   /organism="synthetic DNA construct"  
                   /mol\_type="other DNA"  
                   /note="color: #ffffff"

source            9..468  
                   /organism="recombinant plasmid"  
                   /mol\_type="other DNA"  
                   /note="color: #ffffff"

source            477..9717  
                   /organism="synthetic DNA construct"  
                   /mol\_type="other DNA"  
                   /note="color: #ffffff"

misc\_feature    9..58  
                   /label="Geneious type: Editing History Insertion"  
                   /note="Geneious type: Editing History Insertion"  
                   /note="color: #a6acb3"

promoter        23..57  
                   /label="gRNA promoter"  
                   /note="gRNA promoter"  
                   /note="color: #ffffff"

protein\_bind   complement(59..63)  
                   /label="Esp3I"  
                   /note="Esp3I"  
                   /note="color: #31849b; direction: LEFT"

misc\_feature    64  
                   /label="C"  
                   /note="C"  
                   /note="Geneious type: Editing History Replacement"  
                   /note="color: #a6acb3"

promoter        65..186  
                   /label="lacZ promoter"  
                   /note="lacZ promoter"  
                   /note="color: #ffffff"

CDS              187..363

```

        /label="lacZ"
        /note="lacZ"
        /note="color: #993366; direction: RIGHT"
misc_feature 371..450
        /label="Terminator"
        /note="Terminator"
        /note="color: #a6acb3"
misc_feature 455..464
        /label="Geneious type: Editing History Insertion"
        /note="Geneious type: Editing History Insertion"
        /note="color: #a6acb3"
protein_bind 455..460
        /label="Esp3I"
        /note="Esp3I"
        /note="color: #31849b"
promoter 477..676
        /gene="Csp fdx promoter"
        /note="Csp fdx promoter"
        /note="color: #ffffff"
misc_feature 678..699
        /label="ATATGACCATGATTACGAATTTCGAGCTCGGTACCCGGGGA"
        /note="ATATGACCATGATTACGAATTTCGAGCTCGGTACCCGGGGA"
        /note="ATATGACCATGATTACGAATTTCGAGCTCGGTACCCGGGGA;Geneious
type: Editing History Replacement"
        /note="color: #a6acb3"
CDS 703
        /gene="lacZ alpha"
        /note="lacZ alpha"
        /note="color: #993366; direction: RIGHT"
misc_feature 709..4632
        /note="dcpf-1"
        /note="color: #3366ff; direction: RIGHT"
CDS 4634..4824
        /gene="lacZ alpha"
        /note="lacZ alpha"

```

/note="color: #993366; direction: RIGHT"  
primer\_bind complement(4662..4679)

/gene="M13F"

/note="color: #a020f0; direction: LEFT"

terminator 4826..4867

/gene="Cpa fdx terminator"

/note="Cpa fdx terminator"

/note="color: #ffffff"

CDS 5388..6443

/gene="repA"

/note="repA"

/note="color: #993366; direction: RIGHT"

CDS complement(6534..7037)

/gene="orf2"

/note="orf2"

/note="color: #993366; direction: LEFT"

CDS 7361..7984

/gene="catP"

/note="catP"

/note="color: #993366; direction: RIGHT"

rep\_origin 8197..8742

/gene="ColE1 RNA II"

/gene="ColE1 RNA II"

/note="""cn 8197..8742"

/note="color: #ffff00"

CDS 9143..9583

/gene="traJ"

/note="traJ"

/note="color: #993366; direction: RIGHT"

## ORIGIN

1 cctgcaggcc aacacatcaa gcttgacagc tagctcagtc ctaggataa tgctagccga  
61 gacggcgcaa cgcaattaat gtgagttagc tactcatta ggcacccag gctttacact  
121 ttatgctcc ggctcgtatg ttgtgtggaa ttgtgagcgg ataacaattt cacacaggaa  
181 acagctatga ccatgattac ggattcactg gccgtcgttt tacaacgtcg tgactgggaa  
241 aaccctggcg ttaccact taatgcctt gcagcacatc ccccttcgc cagctggcgt

301 aatagcgaag aggcccgcac cgatcgccct tccaacagt tgcgcagcct gaatggcgaa  
361 tgtaatagt ccaggcatca aataaacga aaggctcagt cgaaagactg ggccttctg  
421 tttatctgt gttgtcggg gaacgctctc ctgacgtctc ctacgtaggc ggccgcgtg  
481 agtagcctgt gaaataagta aggaaaaaa agaagtaagt gttatatatg atgattatt  
541 tgtagatgta gataggataa tagaatccat agaaaatata ggttatacag ttataaaaa  
601 attactttaa aaattaataa aaacatggta aatataaat cgtataaagt tigttaatt  
661 ttaaggaggt gtgttacgga attgttatcc gtcacaatt cctctagaat gacacagtt  
721 gaaggcttca ccaatctcta ccaggctcag aagacgctac gtttgagct tatcccgcag  
781 ggaaaaaccc tgaaacacat tcaggaacag gggttcatag aggaagataa ggccgcgtaac  
841 gaccattata aagaactgaa gcctataatc gaccgtattt ataaaacgta cgccgatcag  
901 tgcctgcagc tggttcagct ggattgggag aatctgtccg cggctattga tagctatcgc  
961 aaagagaaga ccgaggaaac ccgtaacgca ctgattgaag agcaggcgac ctatcggaat  
1021 gcgatccatg attacttcat cggccgcacc gacaacctga ccgatgcaat taacaacgt  
1081 cacgcagaga ttacaaagg tctgtttaa gcagagttat tcaatggcaa ggttctgaaa  
1141 cagctgggta cggtcaccac caccgaacac gaaaacgcac tgctgaggag cttgataaa  
1201 tttaccacat atttcagcgg tttctatgaa aatcgtaaga atgtatttag cgccgaagat  
1261 atttcaccg caattctca tcgtattgtg caggataatt ttccgaagtt taaagaaat  
1321 tgatcatatt ttaccgtct gatcaccgcg gtaccgagcc tgcgagagca tttgaaaac  
1381 gtaagaaag ccattggaat tttgtcagt accagcattg aagaagtgt ttogttccg  
1441 ttctataacc aactgctgac ccagaccag attgatctgt acaatcagct gctggggggc  
1501 ataagccgag aggcaggtac cgaaaagata aagggactca atgaggtgct gaatctggca  
1561 attcagaaga atgatgaaac ggctcatatc attgctagcc tgccgcatcg tttcattccc  
1621 ctgttaagc aaatcctgag cgatcgcaat aactgagct ttatcctcga agagttaaa  
1681 tcggacgaag aagtatcca gagcttttc aaatacaaaa ccctgctgag gaacgaaat  
1741 gtgctggaga ccgctgaagc actgttaat gaactgaact cgatcgacct cacccatatt  
1801 tttatatccc aaaaaaact ggaaaccata agcagcgtc tgtgtgacca ttgggatacc  
1861 ctgcgcaacg ccctgatga acggcgatc agcgagctga ccgggaaat caccaatcc  
1921 gcaaaggaaa aagttcagcg tagtctgaaa cacgaggaca tcaacctgca agaaattatt  
1981 agcgcagcag gtaaagagct gagcgaagca ttcaaacaga aaaccagcga aatcctgagc  
2041 catgcccattg ctgcactgga tcagccgctg ccgaccaccc tgaaaaaaca ggaggaaaag  
2101 gagattctga aaagccaact ggacagcctg ctgggcctgt atcacctgct ggactggttt  
2161 gcagctgatg agagcaacga ggttatcct gagttctccg ctgctctgac cggaatcaag  
2221 ctggagatgg aaccgagtct gtcgttttac aataaagcgc gtaattacgc gaccaagaaa  
2281 ccgtatagcg tggaaaaatt caaactgaac ttccagatgc cgaccctgc aagcggatgg  
2341 gacgttaaca aagaaaaaaa caatggggca attctgttg tgaaaaatgg cctctattat

2401 ctgggtatca tgccgaaaca gaaagggcgc tacaagccc tgcatttga gccgaccgag  
2461 aaaacctcag agggtttoga caagatgtac tacgattatt tcccggatgc ggcaaaaatg  
2521 ataccctaat gtagcacca actgaaggca gttacagccc actttcagac ccataccacc  
2581 ccgatcctgc tgcgaacaa tttatagag ccgctggaaa ttaccaaaga gatttatgat  
2641 ctgaataatc cgaaaagga gcccaagaaa tttcagacgg cgtatgcaaa aaagaccggg  
2701 gatcagaaag gttatcgtga agcgcgtgac aatggattg actttaccg tgactttctg  
2761 tcaaaatata caaaacgac gagcattgat ctgagcagcc tacgtccgag cagccaatat  
2821 aaggatctgg gcgaatatta cgccgaactg aatccgctgc tctaccatat ttcttcca  
2881 cgaatcgtg aaaaagaaat aatggacgcc gttgaaaccg gcaaactgta tctgttcaa  
2941 atctacaaca aagatttgc caaaggccat cacggtaagc cgaacctgca taccctgtat  
3001 tggaccggtc tgttagccc ggagaatctg gccaaaacca gcatcaagct gaacggacag  
3061 gcagaactgt tttaccgccc caaaagccgt atgaaaagga tggcacaccg cctggggcaa  
3121 aaaatgctga ataagaaact caaagatcag aaaacgccga taccggatac ctttatcag  
3181 gagctgtatg attatgtaa ccaccggctg agccatgacc tgagcgacga agcgcgtgca  
3241 ctgctgccga acgtgattac caaggaagtc tcgcatgaaa ttattaaaga tcggcgcttc  
3301 accagtata aattttctt ccatgtaccg atcacctga attatcaagc cgcaaatagc  
3361 cttccaat ttaatcaacg cgtgaatgag tacctgaaag agcatccgga gacccaatt  
3421 attggcatag cacgaggaga acgcaatctc atttatatca ccgtcattga tagcaccggt  
3481 aagatcctgg aacagcgtag cctgaatacc attcagcagt ttgactacca gaaaaagctg  
3541 gacaacagag aaaaggaacg ttagccgcc cggcaggctt ggagtgtgtt ggttactatc  
3601 aaggatctga agcaggggta tctctccaa gttatccatg aaattgtcga tctaatgatt  
3661 cactatcaag cagtagtgtt actggaaaat ctgaatttcg gttcaaaaag caaacgtaca  
3721 gggatcgtg aaaaagccgt ttatcagcag ttcgagaaaa tgctgataga caagctgaat  
3781 tgcttggttc tgaagatta tccggcagag aaggtgggag gtgtgtgaa cccgtaccag  
3841 ctgactgac aatttacgag ctttgcaaaa atgggaacgc agagcgggtt cctgttctat  
3901 gttccggcgc catataccag caagatagac ccgctgacag gtttcgtaga tccgtttgct  
3961 tggaaaacca taaaaatca tgaagtcgc aaacatttc tggagggctt tgattttctg  
4021 cactatgacg tgaaaaccgg cgacttcatt ctgcatttta aatgaaccg taatctgtcc  
4081 tttcagcgcg gctgcctgg ctttatgccg gcgtgggaca ttgttttga aaagaatgag  
4141 acacagttg atgcaaagg taccctttt attgcgggga aacgcattgt gcccggtata  
4201 gaaaatcacc gctcaccgg acggtatagg gactgtacc cggcaaatga attgatagcg  
4261 ctgctggagg agaaaggtat tgccttcgg gatggatcaa acatcctgcc gaagctgctg  
4321 gagaacgatg acagccacgc aatagacacc atggtagcgc tgatccgaag cgtgctgacg  
4381 atgcgtaaca gtaatgcggc tacgggggaa gactacatta atagcccgtt ccgtgatctg  
4441 aacggcggtt gtttcgatag cagatttcaa aatccggagt ggccgatgga tgccgatgcc

4501 aatggagctt accatatcgc tctcaaaggt cagctcctac tgaaccattt gaaagaatca  
4561 aaagatctga aactgcagaa cggcatctcg aatcaggact ggctggccta cattcaagaa  
4621 ctgagaaaact aactcgaggc ctgcagacat gcaagcttgg cactggccgt cgttttacaa  
4681 cgtcgtgact gggaaaaccc tggcgttacc caactaate gccttcagc acatccccct  
4741 ttcgccagct ggcgtaatag cgaagaggcc cgcaccgatc gcccttccca acagttgcg  
4801 agcctgaatg gcgaatggcg ctacataaaa aataagaagc ctgcatttc aggcttcta  
4861 ttttatggc gcgccgttct gaatccttag ctaatggtc aacaggtaac tatgacgaag  
4921 atagcacct ggataagtct gtaatggatt ctaaggcatt taatgaagac gtgtatata  
4981 aatgtgctaa tgaaaaagaa aatgcgtaa aagagcctaa aatgagtca aatggtttg  
5041 aaattgattg gtagttta ttaatatatt tttctattg gctatctcga tacctataga  
5101 atcttctgtt cactttgtt ttgaaatat aaaaaggggc ttttagccc cttttttta  
5161 aaactccgga ggagtttctt cattcttgat actatacgt actatttcg attgacttc  
5221 attgcaatt aagctagtaa aatcaatgg taaaaacaa aaaactgca ttttctacc  
5281 tagtaattta taatttaag tctcgagttt aaaagtataa ttaccagga aaggagcaag  
5341 tttttaata aggaaaaatt ttcctttta aaattctatt tcttatatg actaattata  
5401 atcaaaaaaa tgaaaataaa caagaggtaa aaactgctt agagaaatgt actgataaaa  
5461 aaagaaaaaa tctagattt acgtacata tagcacctt aactactaag aaaaatattg  
5521 aaaggacttc cactgtgga gattattgt ttatgttgag tgatgcagac ttagaacatt  
5581 taaattaca taaaggtaat tttgcggta atagatttg tccaatgtgt agttggcgac  
5641 ttgctgttaa gtagattta gaaatatcta ttctatgga gcatttaaga aaagaagaaa  
5701 ataaagatt tatatttta actottacaa ctccaatgt aaaaagttat gatottaatt  
5761 attctattaa acaatataat aaatcttta aaaaattaat ggagcgtaag gaagttaagg  
5821 atataactaa aggttatata agaaaattag aagtaacta ccaaaaggaa aaatacata  
5881 caaaggattt atggaaaata aaaaagatt attatcaaaa aaaaggactt gaaattggtg  
5941 atttagaacc taatttgat actataatc ctcatctca ttagttatt gcagttaata  
6001 aaagtattt tacagataaa aattattata taaatcgaga aagatggtg gaattatgga  
6061 agtttgctac taaggatgat tctataact aagttgatgt tagaaaagca aaaattaatg  
6121 attataaaga gtttacgaa ctgcgaaat atcagctaa agacactgat ttttaatat  
6181 cgaggccagt attgaaatt tttataaag cattaaaagg caagcaggtt ttagtttta  
6241 gtggattttt taaagatgca cacaaattgt acaagcaagg aaaactgat gttataaaa  
6301 agaaagatga aattaaat gtctatatag ttattataa ttggtgcaaa aaacaatag  
6361 aaaaactag aataaggga cttacggaag atgaaaaga agaattaaat caagatttaa  
6421 tagatgaaat agaaatagat taaagttaa ctatactta tatatatg attaaaaaa  
6481 taaaaacaa cagctatta ggtgtgtt tttatttc tttattaatt ttttaattt  
6541 ttagtttta gttctttttt aaaataagt ttagcctctt ttcaatatt ttttaagaa

6601 ggagtatttg catgaattgc ctttttcta acagacttag gaaatattt aacagtatct  
6661 tcttgcgccg gtgatttgg aacttcataa ctactaatt tataattatt attttcttt  
6721 ttaattgtaa cagttgcaaa agaagctgaa cctgttcctt caactagttt atcatctca  
6781 atataatatt ctgacctat atagtataaa tatatttta ttatatttt actttttct  
6841 gaatctatta ttttataatc ataaaaagt ttaccaccaa aagaagggtg tactccttct  
6901 ggtccaacat attttttac tatattatct aaataattt tgggaactgg tgttgaatt  
6961 tgattaatcg aacaaccagt tatactaaa ggaattataa ctataaaaat atataggatt  
7021 atcttttaa atttcattat tggcctcctt ttattaaat ttatgttacc ataaaaagga  
7081 cataacggga atatgtagaa ttttttaat gtagacaaaa tttacataa atataagaa  
7141 aggaagtgtt tgtttaaatt ttatagcaaa ctatcaaaaa ttagggggat aaaaattat  
7201 gaaaaaaagg ttttcgatgt tattttatg ttaacttta atagtttggt gtttattac  
7261 aaattcggcc ggccagtggg caagtgaaa aattcacaaa aatgtggtat aatatcttg  
7321 ttattagag cgataaact gaattgaga ggggaacttag atggtattg aaaaaattga  
7381 taaaaatagt tggaacagaa aagagtattt tgaccactac tttgcaagt tacctgtac  
7441 ctacagcatg accgttaaag tggatatcac acaataaag gaaaaggga tgaactata  
7501 tcctgcaatg ctttattata ttgcaatgat tgtaaaccgc cattcagagt ttaggacggc  
7561 aatcaatcaa gatggtgaat tggggatata tgatgagatg ataccaagct atacaatatt  
7621 tcacaatgat actgaaacat tttccagcct ttggactgag tgtaagtctg actttaaact  
7681 attttagca gattatgaaa gtgatacgca acggtatgga aacaatcata gaatggaagg  
7741 aaagccaaat gctccgaaa acattttaa tgtatctatg ataccgtggt caacctoga  
7801 tggctttaat ctgaattgc agaaaggata tgattattg attcctattt ttactatggg  
7861 gaaatattat aaagaagata acaaaattat acttccttg gcaattcaag ttcatcacgc  
7921 agtatgtgac ggattcaca tttgccgtt ttgaaacgaa ttgcaggaat tgataaatag  
7981 ttaactcag gttgtctgt aactaaaaac aagtattta gcaaaaaacat cgtagaaata  
8041 cgggttttt tgtacccta agtttaaact ctttttgat aatctcatga ccaaaatccc  
8101 ttaacgtgag tttcgtcc actgagcgtc agaccccgta gaaaagatca aaggatcttc  
8161 ttgagatcct tttttctgc gcgtaactg ctgcttgcaa acaaaaaaac caccgctacc  
8221 agcggtggtt tgttgccgg atcaagagct accaactctt ttccgaagg taactggctt  
8281 cagcagagcg cagataccaa atactgttct tctagttag cgtagttag gccaccactt  
8341 caagaactct gtagcaccgc ctacatacct cgctctgcta atcctgttac cagtggctgc  
8401 tgccagtggc gataagtcgt gtctaccgg gttggactca agacgatagt taccggataa  
8461 ggcgcagcgg tcgggctgaa cggggggttc gtgcacacag ccagcttg agcgaacgac  
8521 ctacaccgaa ctgagatacc tacagcgtga gctatgagaa agcggcacgc tcccgaagg  
8581 gagaaaggcg gacaggtatc cgtaagcgg cagggtcggg acaggagagc gcacgagggg  
8641 gctccaggg ggaaacgcct ggtatcttta tagtctgtc gggttcggc acctctgact



8701 tgagcgtcga ttttgtgat gctcgtcagg ggggcggagc ctatggaaaa acgccagcaa  
8761 cgcggccttt ttacggttcc tggccttttg ctggcctttt gctcacatgt tctttcctgc  
8821 gttatcccct gattctgtgg ataaccgtat taccgccttt gagtgagctg ataccgctcg  
8881 cgcagccga acgaccgagc gcagcagtc agtgagcagag gaagcgggaag agcgcaccaat  
8941 acgcagggcc cctgcttcg gggcattat agcgattttt tcggtatac catcctttt  
9001 cgcacgatat acaggatttt gccaaagggt tcgtgtagac tttccttggg gtatccaacg  
9061 gcgtcagccg ggcaggatag gtgaagtagg cccacccgag agcgggtgtt ccttctcac  
9121 tgtcccttat tcgcacctg cgggtctcaa cggaatcct gctctgcgag gctggccggc  
9181 taccgccggc gtaacagatg agggcaagcg gatggctgat gaaaccaagc caaccaggaa  
9241 gggcagcca cctatcaagg tgtactgcct tccagacgaa cgaagagcga ttgaggaaaa  
9301 ggcggcggcg gccggcatga gcctgtcggc ctacctgctg gccgtcggcc agggctacaa  
9361 aatcacgggc gtcgtggact atgagcacgt ccgagagctg gcccgcatca atggcgacct  
9421 gggccgctg ggcggcctgc tgaactctg gctcaccgac gaccgcgca cggcgcggtt  
9481 cggtgatgcc acgatcctcg ccctgctggc gaagatcgaa gagaagcagg acgagcttg  
9541 caaggtcatg atggcgctgg tccgccgag ggcagagcca tgacttttt agccgctaaa  
9601 acggccgggg ggtgcgctg attgccaagc acgtcccat gcgctccatc aagaagagcg  
9661 acttcgcgga gctggtgaag tacatcaccg acgagcaagg caagaccgat cgggccc

//

**4. Plasmid series pGM-ABCF to pGM-IBCF.** One representative GenBank document is shown.

LOCUS pGM-ABCF 10055 bp ds-DNA circular SYN 15-7?-2021  
DEFINITION .  
ACCESSION .  
VERSION .  
KEYWORDS pMTL82153\_lacza\_dcpf-1\_gRNA (Ra330\_82153\_lacza\_dcpf-1)  
SOURCE synthetic DNA construct  
ORGANISM synthetic DNA construct  
REFERENCE 1 (bases 1 to 10055)  
AUTHORS Itt  
TITLE Direct Submission  
JOURNAL Exported 2021?10?28? from SnapGene 2.3.2  
<http://www.snapgene.com>  
FEATURES Location/Qualifiers  
source 1..10055  
/organism="synthetic DNA construct"

```

        /mol_type="other DNA"
        /note="color: #ffffff"
source      9..806
        /organism="recombinant plasmid"
        /mol_type="other DNA"
        /note="color: #ffffff"
source      815..10055
        /organism="synthetic DNA construct"
        /mol_type="other DNA"
        /note="color: #ffffff"
misc_feature 9..57
        /label="Geneious type: Editing History Insertion"
        /note="Geneious type: Editing History Insertion"
        /note="color: #a6acb3"
promoter    23..57
        /label="gRNA promoter"
        /note="gRNA promoter"
        /note="color: #ffffff"
misc_feature 58..396
        /note="gRNA locus targeting lacza"
        /note="color: #ff0000; direction: RIGHT"
protein_bind complement(397..401)
        /label="Esp3I"
        /note="Esp3I"
        /note="color: #31849b; direction: LEFT"
misc_feature 402
        /label="C"
        /note="C"
        /note="Geneious type: Editing History Replacement"
        /note="color: #a6acb3"
promoter    403..524
        /label="lacZ promoter"
        /note="lacZ promoter"
        /note="color: #ffffff"
CDS         525..701

```

```

        /label="lacZ"
        /note="lacZ"
        /note="color: #993366; direction: RIGHT"
misc_feature 709..788
        /label="Terminator"
        /note="Terminator"
        /note="color: #a6acb3"
misc_feature 793..802
        /label="Geneious type: Editing History Insertion"
        /note="Geneious type: Editing History Insertion"
        /note="color: #a6acb3"
protein_bind 793..798
        /label="Esp3I"
        /note="Esp3I"
        /note="color: #31849b"
promoter 815..1014
        /gene="Csp fdx promoter"
        /note="Csp fdx promoter"
        /note="color: #ffffff"
misc_feature 1016..1037
        /label="ATATGACCATGATTACGAATTTCGAGCTCGGTACCCGGGGA"
        /note="ATATGACCATGATTACGAATTTCGAGCTCGGTACCCGGGGA"
        /note="ATATGACCATGATTACGAATTTCGAGCTCGGTACCCGGGGA;Geneious
type: Editing History Replacement"
        /note="color: #a6acb3"
CDS 1041
        /gene="lacZ alpha"
        /note="lacZ alpha"
        /note="color: #993366; direction: RIGHT"
misc_feature 1047..4970
        /note="dcpf-1"
        /note="color: #3366ff; direction: RIGHT"
CDS 4972..5162
        /gene="lacZ alpha"
        /note="lacZ alpha"

```

primer\_bind complement(5000..5017)  
/note="color: #993366; direction: RIGHT"

/gene="M13F"

/note="color: #a020f0; direction: LEFT"

terminator 5164..5205

/gene="Cpa fdx terminator"

/note="Cpa fdx terminator"

/note="color: #ffffff"

CDS 5726..6781

/gene="repA"

/note="repA"

/note="color: #993366; direction: RIGHT"

CDS complement(6872..7375)

/gene="orf2"

/note="orf2"

/note="color: #993366; direction: LEFT"

CDS 7699..8322

/gene="catP"

/note="catP"

/note="color: #993366; direction: RIGHT"

rep\_origin 8535..9080

/gene="ColE1 RNA II"

/gene="ColE1 RNA II"

/note="""cn 8197..8742"

/note="color: #ffff00"

CDS 9481..9921

/gene="traJ"

/note="traJ"

/note="color: #993366; direction: RIGHT"

## ORIGIN

1 cctgcaggcc aacacatcaa gcttgacagc tagctcagtc ctaggataa tgctagctaa  
61 ttctactct tgtagataca caggaaacag ctatgactaa ttctactct tgtagatcaa  
121 cgctgtgact gggaaaacct aatttact cttgtagata ggagaataga aagaagaaaa  
181 ttcttctaa aggctgaatt ctctgttaa tttgagaga ccattctctc aaaattgaaa  
241 ctctcaata aaaattgaga agtagctgac catcacaaaa tcgtagattt tggatgtcta

301 gctatgttct ttgaaaattg cacagtgaat aagtaaagct aaaggtatat aaaaatcctt  
361 tgaagaata caatttgcaa agtgacagag gaaagcgaga cggcgcaacg caattaatgt  
421 gagttagctc actcattagg caccocaggc ttactacttt atgcttccgg ctgctatgtt  
481 gtgtggaatt gtgagcggat aacaatttca cacaggaaac agctatgacc atgattacgg  
541 attcactggc cgtcgtttta caacgtcgtg actgggaaaa ccctggcgtt acccaactta  
601 atcgcccttc agcacatccc ccttccgcca gctggcgtaa tagcgaagag gcccgaccgg  
661 atcgcccttc ccaacagttg cgcagcctga atggcgaatg gtaatagtcc aggcacaaa  
721 taaaacgaaa ggctcagtcg aaagactggg ccttccgtt tatctgtgt ttgtcggta  
781 acgctctct gacgtctct acgtaggcgg ccgctgttag tagcctgtga aataagtaag  
841 gaaaaaaaaag aagtaagtgt tatatatgat gattattttg tagatgtaga taggataata  
901 gaatccatag aaaatatagg ttatacagtt atataaaaat tactttaaaa attaataaaa  
961 acatgtaaaa atataaatcg tataaagttg tgaattttt aaggaggtgt gttacggaat  
1021 tgttatccgc tcacaattcc tctagaatga cacagtttga aggcctcacc aatctctacc  
1081 aggtcagcaa gacgctacgt ttgagctta tcccgaggg aaaaaccctg aaacacattc  
1141 agaacaggg gttcatagag gaagataagg cgcgtaacga ccattataaa gaactgaagc  
1201 ctataatcga ccgtatttat aaaacgtacg cggatcagtg cctgcagctg gttcagctgg  
1261 attgggagaa tctgtccgcg gctattgata gctatcgaag agagaagacc gaggaaccc  
1321 gtaacgcaat gattgaagag caggcgacct atcggaatgc gatccatgat tacttcatcg  
1381 gccgcaccga caacctgacc gatgcaatta acaaacgtca cgcagagatt tacaaggtc  
1441 tgtttaaagc agagtattc aatggcaagg ttctgaaaca gctgggtacg gtcaccacca  
1501 ccgaacacga aaacgcaactg ctgaggagct ttgataaatt taccacatat ttcagcggtt  
1561 tctatgaaaa tcgtaagaat gtatttagcg ccgaagatat ttccaccgca attcctcatc  
1621 gtattgtgca ggataatttt ccgaagtfta aagaaaattg tcatatttt acccgtctga  
1681 tcaccgagg accgagcctg cgagagcatt ttgaaaacgt taagaaagcc attggaattt  
1741 ttgtcagtac cagcattgaa gaagtgtttt cgttccggt ctataacaa ctgctgacc  
1801 agaccagat tgatctgtac aatcagctgc tggggggcat aagccgagag gcaggtaccg  
1861 aaaagataaa gggactcaat gaggtgctga atctggcaat tcagaagaat gatgaaacgg  
1921 ctatatcat tgctagcctg ccgcatcgtt tcattcccct gtttaagcaa atcctgagcg  
1981 atcgcaatac actgagcttt atcctogaag agtttaaatc ggacgaagaa gttatccaga  
2041 gcttttgcaa atacaaaacc ctgctgcgga acgaaaatgt gctggagacc gctgaagcac  
2101 tgtttaatga actgaactcg atcgacctca cccatatttt tatatccac aaaaaactgg  
2161 aaaccataag cagcgtctg tgtgaccatt gggataccct gcgcaacgcc ctgtatgaac  
2221 ggcgtatcag cgagctgacc gggaaaatca ccaatccgc aaaggaaaaa gttcagcgtg  
2281 gtctgaaaca cgaggacatc aacctgcaag aaattattag cgcagcaggt aaagagctga  
2341 gcgaagcatt caaacagaaa accagcgaaa tctgagcca tgccatgct gcactggatc

2401 agccgctgcc gaccaccctg aaaaaacagg aggaaaagga gattctgaaa agccaactgg  
2461 acagcctgct gggcctgtat cacctgctgg actggtttgc agtcgatgag agcaacgagg  
2521 ttgatcctga gttctccgct cgtctgaccg gaatcaagct ggagatggaa ccgagtctgt  
2581 cgttttacaa taaagcgcgt aattacgcga ccaagaaacc gtatagcgtg gaaaaattca  
2641 aactgaactt tcagatgccg acccttgcaa gcggatggga cgtaacaaa gaaaaaaca  
2701 atggggcaat tctgttttg aaaaatggcc tctattatct gggatcatg ccgaaacaga  
2761 aagggcgcta caaacccctg tcatttgagc cgaccgagaa aacctcagag ggttcgaca  
2821 agatgtacta cgattattc ccggatgcgg caaaaatgat acccaaatgt agcaccac  
2881 tgaaggcagt tacagcccac ttcagacc ataccaccc gatcctgctg tcgaacaatt  
2941 ttatagagcc gctggaaatt accaaagaga ttatgatct gaataatccg gaaaaggagc  
3001 ccaagaaatt tcagacggcg tatgcaaaaa agaccgggga tcagaaaggt tatcgtgaag  
3061 cgctgtgcaa atggattgac tttaccctg actttctgtc aaaatatacc aaaacgacga  
3121 gcattgatct gagcagccta cgtccgagca gccaatataa ggatctgggc gaatattacg  
3181 ccgaactgaa tccgctgctc taccatattt cctccaacg aatcgctgaa aaagaaataa  
3241 tggacgccgt tgaaccggc aaactgtatc tgttcaa atacaacaaa gatttcgcca  
3301 aaggccatca cgtaagccg aacctgcata cctgtattg gaccggtctg tttagcccg  
3361 agaactctgg caaacaccagc atcaagctga acggacaggc agaactgttt taccgcccc  
3421 aaagccgat gaaaaggatg gcacaccgcc tggcgaaaa aatgctgaat aagaaactca  
3481 aagatcagaa aacgccgata ccggatacc ttatcagga gctgtatgat tatgtaacc  
3541 accggctgag ccatgacctg agcgacgaag cgcgctgact gctgccgaac gtgattacca  
3601 aggaagtctc gcatgaaatt attaaagatc ggcgctcac cagtgataaa ttttctcc  
3661 atgtaccgat cacctgaat tatcaagccg caaatagccc ttcaaattt aatcaacgag  
3721 tgaatgcgta cctgaaagag catccggaga cccaattat tggcatagca cgaggagaac  
3781 gcaatctcat ttatatcacc gtcattgata gcaccgtaa gatcctggaa cagcgtagcc  
3841 tgaatccat tcagcagttt gactaccaga aaaagctgga caacagagaa aaggaacgtg  
3901 tagccgcccg gcaggcttg agtgtggtg gtactatcaa ggatctgaag caggggtatc  
3961 tctccaagt tatccatgaa attgtcgtc taatgattca ctatcaagca gtagtggtac  
4021 tggaaaatct gaattcgggt tcaaaaagca aacgtacagg gatcgctgaa aaagccgtt  
4081 atcagcagtt cgagaaaatg ctgatagaca agctgaattg cctggttctg aaagattac  
4141 cggcagagaa ggtggcggt gtgctgaacc cgtaccagct gactgatcaa ttacgagct  
4201 ttgcaaaaat ggaacgcag agcggttcc tgttctatgt tccggcgcca tataccagca  
4261 agatagacc gctgacaggt ttcgtagatc cgttgtctg gaaaaccatt aaaaatcatg  
4321 aaagtcgcaa acatttctg gagggcttg atttctgca ctatgacgtg aaaaccggcg  
4381 acttattct gcattttaa atgaaccgta atctgtcctt tcagcgggc ctgctggct  
4441 ttatgccggc gtgggacatt gttttgaaa agaagtagac acagttgat gccaaaggta

4501 ccccccttat tgcggggaaa cgattgtgc ccgttataga aaatcaccgc ttcaccggac  
4561 ggtatagga ctgtacccg gcaaatgaat tgatagcgct gctggaggag aaaggtattg  
4621 tcttcggga tggatcaaac atcctgccga agctgctgga gaacgatgac agccacgcaa  
4681 tagacacat ggtagcgctg atccgaagcg tgctgcagat gcgtaacagt aatgcggcta  
4741 cgggggaaga ctacattaat agcccggctc gtgatctgaa cggcgttgt ttcgatagca  
4801 gattcaaaa tccggagtgg ccgatggatg ccgatgcaa tggagcttac catatcgctc  
4861 tcaaaggta gtcctactg aaccattga aagaatcaaa agatctgaaa ctgcagaacg  
4921 gcatctgaa tcaggactgg ctggcctaca ttcaagaact gagaaactaa ctcgaggcct  
4981 gcagacatgc aagcttgca ctggccgtcg tttacaacg tcgtgactgg gaaaaccctg  
5041 gcgttaccca acttaatgc ctgacgac atccccctt cgccagctgg cgtaatagcg  
5101 aagaggcccg caccgatgc cctccaac agttgcgag cctgaatggc gaatggcgct  
5161 agcataaaaa taagaagcct gcattgacg gcttctatt tttatggcg gccgttctga  
5221 atccttagct aatggtcaa caggtaacta tgacgaagat agcaccctgg ataagtctgt  
5281 aatggattct aaggcatta atgaagacgt gtatataaaa tgtgctaag aaaaagaaaa  
5341 tgcgttaaaa gagcctaaaa tgagtcaaa tggtttgaa atgattggt agttaaattt  
5401 aatatattt ttctattggc tatctcgata cctatagaat ctctgttca cttttgttt  
5461 tgaaatataa aaaggggctt ttagccct ttttttaaa actccggagg agtttctca  
5521 ttctgatac tatacgtaac ttttctgat ttgactcat tgcattaa gctagtaaaa  
5581 tcaatggta aaaaacaaaa aactgcatt ttctaccta gtaattata atttaagtg  
5641 tcgagttta aagtataatt taccaggaaa ggagcaagtt ttttaataag gaaaaattt  
5701 tcctttaaa attctattc gttatagac taattataat caaaaaatg aaaataaaca  
5761 agagtaaaa actgcttag agaatgtac tgataaaaa agaaaaatc ctgatttac  
5821 gtcatacata gcacctta ctactaagaa aaatattgaa aggactcca ctgtggaga  
5881 ttattgttt atgttgatg atgcagactt agaacattt aaattacata aaggtattt  
5941 ttgcgtaat agatttgc caatgtgtag ttggcgactt gcttgaagg atagttaga  
6001 aatatctatt ctatggagc atttaagaaa agaagaaaat aaagagtta tttttaac  
6061 tctacaact ccaaatgtaa aaagtatga tcttaattat tctattaaac aatataata  
6121 atctttaaa aaattaatg agcgtaagga agttaaggat ataactaaag gttatataag  
6181 aaaattagaa gtaacttacc aaaaggaaaa atacataaca aaggattat ggaaaataa  
6241 aaaagattat tatcaaaaa aaggactga aattggtgat ttagaaccta atttgatac  
6301 ttataatcct catttcatg tagttatgc agttaataaa agttattta cagataaaaa  
6361 ttattatata aatcgagaaa gatggtgga attatggaag ttgctacta aggatgattc  
6421 tataactcaa gttgatgta gaaaagcaaa aattaatgat tataaagagg ttacgaact  
6481 tgcgaaatat tcagctaaag aactgatta ttaatatcg aggccagtat ttgaaattt  
6541 ttataagca ttaaaggca agcaggtatt agtttttagt ggattttta aagatgcaca

6601 caaattgtac aagcaaggaa aacttgatgt ttataaaaag aaagatgaaa ttaaataatgt  
6661 ctatatagtt tattataatt ggtgcaaaaa acaatatgaa aaaactagaa taagggaact  
6721 tacggaagat gaaaaagaag aattaaatca agatttaata gatgaaatag aaatagatta  
6781 aagtgtact atactttata tatatatgat taaaaaaata aaaaacaaca gcctattagg  
6841 ttgtgtttt ttatcttctt tattaatctt ttaaatctt agtttttagt tcttttttaa  
6901 aataagttc agcctcttt tcaatcttt ttaaagaagg agtatttgca tgaattgcct  
6961 ttttctaac agacttagga aatatttaa cagtatctc ttgcgccggt gattttggaa  
7021 ctcataact tactaattta taattattt ttctttttt aattgtaaca gttgcaaaag  
7081 aagctgaacc tgttcttca actagttat catcttcaat ataatttct tgacctatat  
7141 agtataaata ttttttatt atattttac tttttctga atctattatt ttataatcat  
7201 aaaaagttt accaccaaaa gaaggttga ctcctctgg tccaacatat tttttacta  
7261 tattatctaa ataattttg ggaactggg ttgtaattg attaatcgaa caaccagtta  
7321 tactaaagg aattataact ataaaaat ataggattat cttttaaat tcattattg  
7381 gcctccttt tattaaatt atgttaccat aaaaaggaca taacgggaat atgtagaata  
7441 ttttaagt agacaaaatt ttacataaat ataaagaag gaagtgttg tttaaatct  
7501 atagcaaaact atcaaaaatt agggggataa aaatttatga aaaaagggt ttcgatgta  
7561 ttttatgt taacttaat agtttgggt ttatttaca attcggccgg ccagtgggca  
7621 agtgaaaaa ttcacaaaaa tgggtataa tatcttgtt cattagagcg ataaactga  
7681 attgagagg gaacttagat ggtattgaa aaaattgata aaaatagtg gaacagaaaa  
7741 gagtatttg accactact tgcaagtga cctgtacct acagcatgac cgtaaagtg  
7801 gatcacac aaataaagga aaagggaatg aactatc ctgcaatgct ttattatatt  
7861 gcaatgattg taaaccgcca tcagagttt aggacggca tcaatcaaga tggtaattg  
7921 gggatatatg atgagatgat accaagctat acaatcttc acaatgatac tgaacattt  
7981 tccagccttt ggactgagtg taagtctgac ttaaactcat ttttagcaga ttatgaaagt  
8041 gatacgcaac ggtatggaaa caatcataga atggaaggaa agccaatgc tccgaaaaac  
8101 attttaatg tatctatgat accgtgtgca acctcgatg gcttaatct gaattgcag  
8161 aaaggatag attattgat tctatctt actatgggga aatattataa agaagataac  
8221 aaaattatac ttccttggc aattcaagtt catcacgcag tatgtgacgg atttcacatt  
8281 tgccgtttg taaacgaatt gcaggaattg ataaatagtt aacttcaggt ttgtctgtaa  
8341 ctaaaaaaca gtatttaagc aaaaacatcg tagaaatcg gtgtttttg ttaccctaag  
8401 ttaaactcc ttttgataa tctcatgacc aaaaatccctt aacgtgagtt ttcgtccac  
8461 tgagcgtcag accccgtaga aaagatcaaa ggatcttct gagatcctt tttctgcg  
8521 gtaatctgct gctgcaaac aaaaaacca cgcctaccag cgggtggtt tttgccgat  
8581 caagagctac caactcttt tccgaagga actggcttca gcagagcgca gataccaaat  
8641 actgttctc tagttagcc gtagttaggc caccactca agaactctgt agcaccgct



8701 acatacctcg ctctgcta at cctgttacca gtggctgctg ccagtggcga taagtcgtgt  
8761 cttaccgggt tggactcaag acgatagtta ccggataagg cgcagcggtc gggctgaacg  
8821 gggggttcgt gcacacagcc cagcttgag cgaacgacct acaccgaact gagataccta  
8881 cagcgtgagc tatgagaaag cgccacgctt cccgaaggga gaaaggcgga caggtatccg  
8941 gtaagcggca gggtcggaac aggagagcgc acgagggagc ttccaggggg aaacgcttg  
9001 tatctttata gtctgtcgg gtttcgccac ctctgactg agcgtcgatt tttgtgatg  
9061 tcgtcagggg ggcggagcct atggaaaaac gccagcaacg cggcctttt acggttctct  
9121 gccttttgc ggcctttgc tcacatgtt tttctgctg tatcccctga ttctgtggat  
9181 aaccgtatta ccgccttga gtgagctgat accgctcgcc gcagccgaac gaccgagcgc  
9241 agcagctcag tgagcgagga agcgggaagag cgccaatac gcagggcccc ctgctcggg  
9301 gtcattatag cgatttttc ggtatatcca tccttttcg cacgatatac aggattttgc  
9361 caaagggttc gtgtagactt tccttggtgt atccaacggc gtcagccggg caggataggt  
9421 gaagtaggcc caccgcgag cgggtgttcc ttcttactg tccctattc gcacctggcg  
9481 gtgctcaacg ggaatcctgc tctgcgagc tggccggcta ccgccggcgt aacagatgag  
9541 ggcaagcgga tggctgatga aaccaagcca accaggaagg gcagcccacc tatcaaggtg  
9601 tactgcctc cagacgaacg aagagcgatt gaggaaaagg cggcggcggc cggcatgagc  
9661 ctgtcggcct acctgctggc cgctggccag ggctacaaaa tcacggggcgt cgtggactat  
9721 gagcacgtcc gcgagctggc ccgcatcaat ggcgacctgg gccgcctggg cggcctgctg  
9781 aaactctggc tcaccgacga cccgcgcacg gcgcggttcg gtgatgccac gatcctcgcc  
9841 ctgctggcga agatcgaaga gaagcaggac gagcttgca aggtcatgat gggcgtggtc  
9901 cgcccagggg cagagccatg acttttttag ccgctaaaac ggccgggggg tgccgctgat  
9961 tgccaagcac gtccccatgc gctccatcaa gaagagcgac ttcgaggagc tggtaagta  
10021 catcaccgac gagcaaggca agaccgatcg ggccc

//

**5. Plasmid series pGM-ABCD to pGM-IBCD.** One representative GenBank document is shown.

LOCUS pGM-ABCD 9329 bp ds-DNA circular SYN 05-10?-2019  
DEFINITION .  
ACCESSION .  
VERSION .  
KEYWORDS pMTL82153\_dcpf-1  
SOURCE synthetic DNA construct  
ORGANISM synthetic DNA construct  
REFERENCE 1 (bases 1 to 9329)  
AUTHORS Itt

TITLE Direct Submission

JOURNAL Exported Friday, May 17, 2019 from SnapGene 2.3.2

<http://www.snapgene.com>

REFERENCE 2 (bases 1 to 9329)

AUTHORS .

TITLE Direct Submission

JOURNAL Exported 2021?10?28? from SnapGene 2.3.2

<http://www.snapgene.com>

FEATURES Location/Qualifiers

source 1..9329

/organism="synthetic DNA construct"

/mol\_type="other DNA"

/note="color: #ffffff"

terminator 9..62

/gene="CD0164 terminator"

/note="CD0164 terminator"

/note="color: #ffffff"

primer\_bind 63..80

/gene="M13R"

/note="color: #a020f0; direction: RIGHT"

promoter 89..288

/gene="Csp fdx promoter"

/note="Csp fdx promoter"

/note="color: #ffffff"

misc\_feature 290..311

/label="ATATGACCATGATTACGAATTCGAGCTCGGTACCCGGGGA"

/note="ATATGACCATGATTACGAATTCGAGCTCGGTACCCGGGGA"

/note="ATATGACCATGATTACGAATTCGAGCTCGGTACCCGGGGA;Geneious  
type: Editing History Replacement"

/note="color: #a6acb3"

CDS 315

/gene="lacZ alpha"

/note="lacZ alpha"

/note="color: #993366; direction: RIGHT"

misc\_feature 321..4244

/note="dcpf-1"  
/note="color: #3366ff; direction: RIGHT"  
CDS 4246..4436  
/gene="lacZ alpha"  
/note="lacZ alpha"  
/note="color: #993366; direction: RIGHT"

primer\_bind complement(4274..4291)  
/gene="M13F"  
/note="color: #a020f0; direction: LEFT"

terminator 4438..4479  
/gene="Cpa fdx terminator"  
/note="Cpa fdx terminator"  
/note="color: #ffffff"

CDS 5000..6055  
/gene="repA"  
/note="repA"  
/note="color: #993366; direction: RIGHT"

CDS complement(6146..6649)  
/gene="orf2"  
/note="orf2"  
/note="color: #993366; direction: LEFT"

CDS 6973..7596  
/gene="catP"  
/note="catP"  
/note="color: #993366; direction: RIGHT"

rep\_origin 7809..8354  
/gene="ColE1 RNA II"  
/note="color: #ffff00"

CDS 8755..9195  
/gene="traJ"  
/note="traJ"  
/note="color: #993366; direction: RIGHT"

#### ORIGIN

1 cctgcaggat aaaaaaattg tagataaatt ttataaaata gttttatcta caatttttt

61 atcaggaaac agctatgacc gcggccgcgt gtagtagcct gtgaaataag taaggaaaaa

121 aaagaagtaa gtgtatata tgatgattat tttgtagatg tagataggat aatagaatcc  
181 atagaaaata taggttatac agttatataa aaattacttt aaaaattaat aaaaacatgg  
241 taaaatataa atcgtataaa gttgtgtaat ttttaaggag gtgtgttacg gaattgttat  
301 ccgctcaciaa ttcctctaga atgacacagt ttgaaggctt caccaatctc taccaggta  
361 gcaagacgct acgttttgag ctatcccg agggaaaaac cctgaaacac attcaggaac  
421 aggggttcat agaggaagat aaggcgcgta acgaccatta taaagaactg aagcctataa  
481 tcgaccgtat ttataaacg tacgcggatc agtgcctgca gctgggtcag ctggattggg  
541 agaatctgtc cgcggtatt gatagctatc gcaaagagaa gaccgaggaa acccgtaacg  
601 cactgattga agagcaggcg acctatcgga atgcgatcca tgattacttc atcgccgca  
661 ccgacaacct gaccgatgca attaacaaac gtcacgcaga gatttaciaa ggtctgttta  
721 aagcagagtt attcaatggc aaggttctga aacagctggg tacggtcacc accaccgaac  
781 acgaaaacgc actgctgagg agctttgata aatttaccac atatttcagc ggtttctatg  
841 aaaatcgtaa gaatgtatt agcgccgaag atatttcac cgcaattcct catcgtattg  
901 tgaggataa tttccgaag tttaaagaaa attgtcatat tttaccctg ctgatcaccg  
961 cggtagcag cctgcgagag cttttgaaa acgtaagaa agccattgga attttgtca  
1021 gtaccagcat tgaagaagtg tttcgttcc cgttctataa ccaactgctg acccagacc  
1081 agattgatct gtacaatcag ctgctggggg gcataagccg cgaggcaggt accgaaaaga  
1141 taaagggact caatgagggt ctgaatctgg caattcagaa gaatgatgaa acggctcata  
1201 tcattgctag cctgccgcat cgtttcattc ccctgttaa gcaaatcctg agcgatcgca  
1261 atacactgag cttatcctc gaagagtta aatcggacga agaagttatc cagagctttt  
1321 gcaatacaa aaccctgctg cggaacgaaa atgtgctgga gaccgctgaa gcaactgtta  
1381 atgaactgaa ctgatcgac ctacccata ttttatac ccacaaaaaa ctggaaacca  
1441 taagcagcgc tctgtgtgac cattgggata ccctgcgcaa cgccctgat gaacggcgta  
1501 tcagcgagct gaccgggaaa atcacciaat ccgcaaagga aaaagttcag cgtagtctga  
1561 aacacgagga catcaacctg caagaaatta ttagcgcagc aggtaaagag ctgagcgaag  
1621 cattcaaaca gaaaaccagc gaaatcctga gccatgcca tgctgactg gatcagccgc  
1681 tgccgaccac cctgaaaaa caggaggaaa aggagattct gaaaagccaa ctggacagcc  
1741 tgctggcct gtatcacctg ctggactggt ttgcagtcga tgagagcaac gaggtgatc  
1801 ctgagttctc cgctgtctg accggaatca agctggagat ggaaccgagt ctgtcgtttt  
1861 acaataaagc gcgtaattac gcgaccaaga aaccgtatag cgtggaaaaa tcaaaactga  
1921 actttcagat gccgaccctt gcaagcggat gggacgttaa caaagaaaaa aacaatgggg  
1981 caattctgtt tgtgaaaaat gccctctatt atctgggtat catgccgaaa cagaaagggc  
2041 gctacaaagc cctgtcattt gagccgaccg agaaaacctc agagggttc gacaagatgt  
2101 actacgatta tttccggat gcggcaaaaa tgataccaa atgtagcacc caactgaag  
2161 cagttacagc ccacttcag acccatacca cccgatcct gctgtcgaa aattttatag

2221 agccgctgga aattaccaa gagatttatg atctgaataa tccgaaaag gagccaaga  
2281 aattcagac ggcgatgca aaaaagaccg gggatcagaa aggtatcgt gaagcgtgt  
2341 gcaaatggat tgactttacc cgtgacttcc tgtcaaaata taccaaacg acgagcattg  
2401 atctgagcag cctacgtccg agcagccaat ataaggatct gggcgaatat tacgccgaac  
2461 tgaatccgct gctctaccat atttcttcc aacgaatcgc tgaaaaagaa ataattggacg  
2521 ccgttgaaac cggcaaactg tatctgttcc aatctacaa caaagatttc gccaaaggcc  
2581 atcacggtaa gccgaacctg cataacctgt attggaccgg tctgtttagc ccggagaatc  
2641 tggccaaaac cagcatcaag ctgaacggac aggcagaact gttttaccgc cccaaaagcc  
2701 gtatgaaaag gatggcacac cgctgggagc aaaaaatgct gaataagaaa ctcaaagatc  
2761 agaaaacgcc gataccggat accctttatc aggagctgta tgattatgtt aaccaccggc  
2821 tgagccatga cctgagcagc gaagcgcgtg cactgctgcc gaacgtgatt accaaggaag  
2881 tctcgcagca aattatcaa gatcggcgtc tcaccagtga taaattttc ttccatgtac  
2941 cgatcaccct gaattatcaa gccgcaata gcccttcaa attaatcaa cgcgtgaatg  
3001 cgtacctgaa agagcatccg gagaccccaa ttattggcat agcacgagga gaacgcaatc  
3061 tcatttatat caccgtcatt gatagcaccg gtaagatcct ggaacagcgt agcctgaata  
3121 ccattcagca gtttgactac cagaaaaagc tggacaacag agaaaaggaa cgtgtagccc  
3181 cccggcagc tggagtggtg gtgggtacta tcaaggatct gaagcagggg tatctctccc  
3241 aagttatcca tgaattgtc gatctaata ttcactatca agcagtagtg gtactggaaa  
3301 atctgaattt cggtttcaa agcaaacgta cagggatcgc tgaaaaagcc gtttatcagc  
3361 agttcgagaa aatgctgata gacaagctga attgcctggt tctgaaagat tatccggcag  
3421 agaaggtggg cgggtgtctg aaccgtacc agctgactga tcaattacg agctttgcaa  
3481 aatgggaac gcagagcggc ttctgttct atgttccggc gccatatacc agcaagatag  
3541 acccgctgac aggtttcgtg gatccgtttg tctggaaaac cattaaaaat catgaaagtc  
3601 gcaaacattt tctggagggc tttgatttcc tgactatga cgtgaaaacc ggcgacttca  
3661 ttctgcattt taaaatgaac cgtaatctgt ctttcagcgc cggcctgcct ggctttatgc  
3721 cggcgtggga cattgtttt gaaaagaatg agacacagtt tgatgcaaaa ggtaccccct  
3781 ttattgcggg gaaacgcatt gtgcccgtta tagaaaatca ccgcttcacc ggacgggata  
3841 gggacttgta cccggcaaat gaattgatag cgctgctgga ggagaaaggt attgtcttcc  
3901 gggatggatc aaacatcctg ccgaagctgc tggagaacga tgacagccac gcaatagaca  
3961 ccatggtagc gctgatccga agcgtgctgc agatgcgtaa cagtaatgag gctacggggg  
4021 aagactacat taatagcccg gtccgtgatc tgaacggcgt ttgtttgat agcagatttc  
4081 aaaatccgga gtggccgatg gatgccgatg ccaatggagc ttaccatc gctctcaaag  
4141 gtcagctcct actgaacat ttgaaagaat caaaagatct gaaactgcag aacggcatct  
4201 cgaatcagga ctggctggcc tacattcaag aactgagaaa ctaactcgag gctgcagac  
4261 atgcaagctt ggcaactggc gtcgttttac aacgtcgtga ctgggaaaac cctggcgtta

4321 cccaacttaa tcgccttgca gcacatcccc ctctcgccag ctggcgtaat agcgaagagg  
4381 cccgcaccga tcgccctcc caacagttgc gcagcctgaa tggcgaatgg cgctagcata  
4441 aaaataagaa gcctgcattt gcaggcttct tattttatg gcgcgccggt ctgaatcctt  
4501 agctaattgt tcaacaggta actatgacga agatagcacc ctggataagt ctgtaatgga  
4561 ttctaaggca tttaatgaag acgtgtatat aaaatgtgct aatgaaaaag aaaatgcggt  
4621 aaaagagcct aaaatgagtt caaatgggtt tgaattgat tggtagttta attaatata  
4681 tttttctat tggctatctc gataacctata gaatctctg ttcactttg ttttgaaat  
4741 ataaaaaggg gctttttagc ccctttttt taaaactccg gaggagtctt tcattcttg  
4801 atactatacg taactatctt cgatttgact tcattgtcaa ttaagctagt aaaatcaatg  
4861 gttaaaaaac aaaaaacttg catttttcta cctagtaatt tataattta agtgtcgagt  
4921 ttaaaagtat aattaccag gaaaggagca agtttttaa taaggaaaaa ttttcttt  
4981 taaaattcta ttcgttata tgactaatta taatcaaaaa aatgaaaata aacaagaggt  
5041 aaaaactgct ttagagaaat gtactgataa aaaaagaaaa aatcctagat ttacgtcata  
5101 catagcacct ttaactacta agaaaaatat tgaaaggact tccacttggt gagattattt  
5161 gtttatgttg agtgcagcag acttagaaca ttttaaatta cataaaggta attttgccg  
5221 taatagattt tgcctaatgt gtagtggcg actgctgtt aaggatagtt tagaaatc  
5281 tattcttatg gagcattta gaaaagaaga aaataaagag tttatattt taactctac  
5341 aactccaat gtaaaaagt atgatctta ttattctatt aaacaatata ataatcttt  
5401 taaaaaatta atggagcgt aggaagtaa ggatataact aaaggtata taagaaaatt  
5461 agaagtaact taccaaagg aaaaatacat acaaaggat ttatggaaaa taaaaaaga  
5521 ttattatcaa aaaaaggac tgaaattgg tgatttagaa cctaatttg atactataa  
5581 tcctcatctt catgtagtta ttgcagtaa taaaagtat tttacagata aaaattatta  
5641 tataaatcga gaaagatgg tggaaattat gaagtttgc actaaggatg attctataac  
5701 tcaagttgat gttagaaaag caaaaattaa tgattataaa gaggtttacg aactgcgaa  
5761 atattcagct aaagacactg attattaat atcgaggcca gtattgaaa tttttataa  
5821 agcattaaaa ggcaagcagg tattagttt tagtggattt ttaaagatg cacacaaatt  
5881 gtacaagcaa ggaaaactg atgttataa aaagaaagat gaaattaa atgtctatat  
5941 agttattat aattggtgca aaaaacaata tgaaaaaact agaataaggg aacttacgga  
6001 agatgaaaaa gaagaattaa atcaagattt aatagatgaa atagaaatag attaaagt  
6061 aactatactt tatatatata tgattaaaa aataaaaaac aacagcctat taggtgttg  
6121 tttttattt tcttattaa ttttttaatt ttttagttt tagttcttt ttaaataag  
6181 ttcagcctc ttttcaata tttttaaag aaggagtatt tgcattgaatt gcctttttc  
6241 taacagactt aggaaatatt ttaacagat ctcttgccg cggtgattt ggaacttcat  
6301 aactactaa ttataatta ttatttctt ttttaattg aacagttgca aaagaagctg  
6361 aacctgtcc ttcaactagt ttatcatctt caatataata ttcttgacct atatagtata

6421 aatatatatt tattatatt ttacttttt ctgaatctat tttttataa tcataaaaag  
6481 tttaccacc aaaagaaggt tgtactcctt ctggtccaac atatatttt actatattat  
6541 ctaaataatt tttgggaact ggtgttgtaa ttgattaat cgaacaacca gttatactta  
6601 aaggaattat aactataaaa atatatagga ttatctttt aaatttcatt attggcctcc  
6661 tttttattaa atttatgta ccataaaaag gacataacgg gaatatgtag aatattttta  
6721 atgtagacaa aattttacat aaatataaag aaaggaagtg tttgtttaaa tttatagca  
6781 aactatcaaa aattaggggg ataaaaatt atgaaaaaa ggttttcgat gttattttta  
6841 tgtttaactt taatagtttg tggtttatt acaaattcgg cggccagtg ggcaagtga  
6901 aaaattcaca aaaatgtggt ataatatctt tgttcattag agcgataaac tgaattga  
6961 gaggaactt agatggtatt tgaaaaaatt gataaaaata gttggaacag aaaagagat  
7021 tttgaccact actttgcaag tgtacctgt acctacagca tgaccgttaa agtggatac  
7081 acacaaataa aggaaaaggg aatgaaacta tatcctgcaa tgctttatta tattgcaatg  
7141 attgtaaacc gccattcaga gtttaggacg gcaatcaatc aagatggtga attggggata  
7201 tatgatgaga tgataccaag ctatacaata ttcacaatg atactgaaac atttccagc  
7261 cttggactg agtgaagtc tgactttaa tcatttttag cagattatga aagtgatac  
7321 caacggtatg gaaacaatca tagaatggaa ggaaagccaa atgctccgga aacattttt  
7381 aatgtatcta tgataccgtg gtcaacctc gatggcttta atctgaattt gcagaaagga  
7441 tatgattatt tgattcctat tttfactatg gggaaatatt ataaagaaga taacaaaatt  
7501 atacttctt tggcaattca agtcatcac gcagtatgtg acggattca cattgcccgt  
7561 tttgtaaacg aattgcagga attgataaat agttaactc aggtttgtct gtaactaaa  
7621 acaagtattt aagcaaaaac atcgtagaaa tacggtggtt tttgttacc taagttaaa  
7681 ctcttttg ataatctcat gacaaaatc cctaacgtg agttttcgtt cactgagcg  
7741 tcagacccc tagaaaagat caaaggatct tcttgagatc cttttttct gcgcgtaac  
7801 tgctgctgc aaacaaaaaa accaccgcta ccagcgggtg tttgtttgcc ggaatcaagag  
7861 ctaccaactc ttttccgaa ggtaactggc tcagcagag cgagatacc aaatactgtt  
7921 cttctagtgt agccgtagt aggccaccac ttcaagaact ctgtagcacc gcctacatac  
7981 ctgctctgc taactctgt accagtggct gctgccagtg gcgataagtc ggtcttacc  
8041 gggttggact caagacgata gttaccggat aaggcgcagc ggtcgggctg aacggggggt  
8101 tcgtgcacac agcccagctt ggagcgaacg acctacaccg aactgagata cctacagcgt  
8161 gagctatgag aaagcggcac gcttcccga gggagaaagg cggacaggta tccggttaagc  
8221 ggcagggctg gaacaggaga gcgcacgagg gagctccag ggggaaacgc ctggtatctt  
8281 tatagctctg tcgggttctg ccacctctga ctgagcgtc gattttgtg atgctctca  
8341 gggggcgga gcctatggaa aaacggcagc aacgcggcct tttacggtt cctggcctt  
8401 tgctggcctt tgctacat gttcttctc gcgtatccc ctgattctgt ggataaccgt  
8461 attaccgctt ttgagtgagc tgataccgct cgccgcagcc gaacgaccga gcgcagcag

8521 tcagtgagcg aggaagcgga agagcgcca atacgcaggg cccctgctt cggggtcatt  
8581 atagcgattt ttcggtata tccatcctt ttcgcacgat atacaggatt tgccaaagg  
8641 gttcgtgtag actttccttg gtgtatcaa cggcgtcagc cgggcaggat aggtgaagta  
8701 ggcccaccg cgagcgggtg ttccttctc actgtccctt attgcacct ggcggtgctc  
8761 aacgggaatc ctgctctgcg aggctggccg gctaccgccg gcgtaacaga tgagggcaag  
8821 cggatggctg atgaaaccaa gccaccagg aagggcagcc cacctatcaa ggtgtactgc  
8881 cttccagacg aacgaagagc gattgaggaa aaggcggcgg cggccggcat gagcctgtcg  
8941 gcctacctgc tggccgtcgg ccagggtac aaaatcacgg gcgtcgtgga ctatgagcac  
9001 gtccgcgagc tggcccgcac caatggcgac ctgggccgcc tgggcccct gctgaaactc  
9061 tggctcaccg acgaccgcg cacggcgcgg ttcggtgatg ccacgatcct cgccctgctg  
9121 gcgaagatcg aagagaagca ggacgagctt ggcaaggta tgatgggctg ggtccgcccg  
9181 agggcagagc catgactttt ttaccgcta aaacggccgg ggggtgctcg tgattgcaa  
9241 gcacgtcccc atgcgtcca tcaagaagag cgacttcgcg gagctggtga agtatcac  
9301 cgacgagcaa ggcaagaccg atcgggcc

//

**6. Plasmid series pGM-ACAQ to pGM-ICAQ.** One representative GenBank document is shown.

LOCUS pGM-ACAQ 9812 bp ds-DNA circular SYN 04-8?-2021  
DEFINITION [pMTL007C-E2:203297].  
ACCESSION DNA2.0  
VERSION .  
KEYWORDS pMTL007C-E2-Clostron\_82\_16S\_685\_Erm (Ra514+Ra511 or Ra547+Ra545)  
SOURCE synthetic DNA construct  
ORGANISM synthetic DNA construct  
REFERENCE 1 (bases 1 to 9812)  
AUTHORS .  
TITLE Direct Submission  
JOURNAL Exported Sunday, Jul 10, 2016 from SnapGene Viewer 3.1.2  
<http://www.snapgene.com>  
REFERENCE 2 (bases 1 to 9812)  
AUTHORS .  
TITLE Direct Submission  
JOURNAL Exported 2021?10?28? from SnapGene 2.3.2  
<http://www.snapgene.com>  
FEATURES Location/Qualifiers



source 1..9812  
 /organism="synthetic"  
 /note="color: #ffffff"

source 6544..8934  
 /organism="synthetic DNA construct"  
 /mol\_type="other DNA"  
 /note="color: #ffffff"

source 6544..8934  
 /organism="synthetic"  
 /note="color: #ffffff"

misc\_feature 1..620  
 /product="Ori\_pBR"  
 /label="Ori\_pBR"  
 /note="Ori\_pBR"  
 /note="color: #ffff00"

misc\_feature 807..1532  
 /product="oriT [ident:99.86, cov:97.84]"  
 /label="oriT [ident:99.86, cov:97.84]"  
 /note="oriT [ident:99.86, cov:97.84]"  
 /note="color: #a6acb3"

misc\_feature 1002..1439  
 /product="traJ\_\*"  
 /label="traJ\_\*"  
 /note="traJ\_\*"  
 /note="color: #993366; direction: RIGHT"

misc\_feature 1582..1757  
 /product="P\_fdx"  
 /label="P\_fdx"  
 /note="P\_fdx"  
 /note="color: #a6acb3"

gene 1779..2087  
 /gene="Csp\_316-736s"  
 /label="Csp\_316-736s"  
 /note="16S\_685"  
 /note="Csp\_316-736s"

/note="color: #0000ff; direction: RIGHT"  
misc\_feature 1779..2087  
        /product="insert:"  
        /label="insert:"  
        /note="insert:"  
        /note="color: #0000ff"  
misc\_feature 2496..2529  
        /note="FRT site"  
        /note="color: #a6acb3"  
misc\_feature complement(2496..2529)  
        /note="FRT (minimal)"  
        /note="color: #008080; direction: LEFT"  
misc\_feature complement(2543..3280)  
        /note="ermB"  
        /note="color: #800080; direction: LEFT"  
misc\_feature 3313..3705  
        /note="td intron"  
        /note="color: #a6acb3"  
misc\_feature 3706..3782  
        /note="thl promoter"  
        /note="color: #ffffff"  
misc\_feature 3783..3816  
        /note="FRT site"  
        /note="color: #a6acb3"  
misc\_feature complement(3783..3816)  
        /note="FRT (minimal)"  
        /note="color: #008080; direction: LEFT"  
misc\_feature 4091..4103  
        /product="strong RBS"  
        /label="strong RBS"  
        /note="strong RBS"  
        /note="color: #a6acb3"  
misc\_feature 4288..6087  
        /note="ltrA"  
        /note="color: #993366; direction: RIGHT"

```

misc_feature 6264..6494
    /product="Term_rrnBT1T2"
    /label="Term_rrnBT1T2"
    /note="Term_rrnBT1T2"
    /note="color: #a6acb3"
CDS      7056..8111
    /gene="repA"
    /note="repA"
    /note="color: #993366; direction: RIGHT"
CDS      complement(8202..8705)
    /gene="orf2"
    /note="orf2"
    /note="color: #993366; direction: LEFT"
misc_feature 9029..9652
    /note="catP"
    /note="color: #ff0000; direction: RIGHT"

```

ORIGIN

```

1 agatcaaagg atcttctga gatcctttt ttctgcgct aatctgctg tgcaaacaa
61 aaaaccacc gctaccagcg gtggttgtt tgccgatca agagctacca actcttttc
121 cgaaggtaac tggcttcagc agagcgcaga taccaaatac tgccttcta gtgtagccgt
181 agttaggcca ccactcaag aactctgtg caccgcctac atacctcgt ctgctaacc
241 tgttaccagt ggctgctgcc agtggcgata agtcgtgtct taccgggtg gactcaagac
301 gatagttacc ggataaggcg cagcggtcgg gctgaacggg gggttcgtg acacagccca
361 gcttgagcg aacgacctac accgaactga gatacctaca gcgtgagcat tgagaaagcg
421 ccacgctcc cgaagggaga aaggcggaca ggtatccggt aagcggcagg gtcggaacag
481 gagagcgcac gagggagctt ccagggggaa acgcctggta tcttatagt cctgtcgggt
541 ttcgccacct ctgactgag cgtcgatttt tgtgatgctc gtcagggggg cggagcctat
601 ggaaaaacgc cagcaacgcg gccttttac ggttcctggc ctttgctgg cctttgctc
661 acatgttct tctgcttta tcccctgatt ctgtggataa ccgtattacc gccttgagt
721 gagctgatac cgctcgccgc agccgaacga ccgagcgcag cgagtcagt agcggaggaag
781 cggaagagcg cccaatacgc agggccccct gcttcggggg cattatagcg atttttcgg
841 tatatccat cttttcga cgatatacag gattttgcca aagggtcgt gtgactttc
901 ctggtgtat ccaacggcgt cagccgggca ggataggtga agtaggcca cccgcgagcg
961 ggtgtcctt cttactgct cttattcgc acctggcggg gctcaacggg aatcctgctc
1021 tgcgaggctg gccggctacc gccggcgtaa cagatgaggg caagcggatg gctgatgaaa

```

1081 ccaagccaac caggaagggc agcccaccta tcaaggtgta ctgcctcca gacgaacgaa  
1141 gagcgattga ggaaaaggcg gcggcgccg gcatgagcct gtcggcctac ctgctggccg  
1201 tcggccaggg ctacaaaac acgggcgctg tggactatga gcacgtccgc gagctggccc  
1261 gcatcaatgg cgacctgggc cgctggggcg gcctgctgaa actctggctc accgacgacc  
1321 cgcgcacggc gcggttcggt gatgccacga tcctcgccct gctggcgaag atcgaagaga  
1381 agcaggacga gcttggaag gtcattgatg gcgtgggccg cccgagggca gagccatgac  
1441 tttttagcc gctaaaacgg ccgggggggtg cgcgtagtg ccaagcacgt ccccatgcgc  
1501 tccatcaaga agagcgactt cgcgagactg gtgaagtaca tcaccgacga gcaaggcaag  
1561 accgatcggg cccctgcag ggtgtagtag cctgtgaaat aagtaaggaa aaaaaagaag  
1621 taagtgtat atatgatgat tttttgtag atgtagatag gataatagaa tccatagaaa  
1681 atataggta tacagttata taaaaattac tttaaaaatt aataaaaaca tggtaaaata  
1741 taaatcgtat aaagttgtgt aatttttaag ctttataatt atccttagcc ttcgccactg  
1801 tgcgccaga taggggtgta agtcaagtag ttaaggtag tactctgtaa gataacacag  
1861 aaaacagcca acctaaccga aaagcgaag ctgatacggg aacagagcac ggttggaag  
1921 cgatgagta ctaaagaca atcgggtacg actgagtcgc aatgttaac agatataagg  
1981 tataagttgt gtttactgaa cgcaagttc taatttcgat taaggctcga tagaggaaag  
2041 tgtctgaaac ctctagtaca aagaaaggta agttaccagt ggcgacttat ctgttatcac  
2101 cacatttga caatctgtag gagaacctat gggaacgaaa cgaaagcgat gccgagaatc  
2161 tgaattacc aagactaac actaactggg gataccctaa acaagaatgc ctaatagaaa  
2221 ggaggaaaaa ggctatagca ctagagcttg aaaatctgc aagggtacgg agtactcgt  
2281 gtagtctgag aaggtaacg ccctttacat ggcaaagggg tacagttatt gtgtactaaa  
2341 attaaaaatt gattaggag gaaaacctca aatgaaacc aacaatggca attttagaaa  
2401 gaatcagtaa aaatcaca gaaatatag acgaagttt tacaagactt tatcgttatc  
2461 ttttacgtcc agatatttat tacgtggcga cgcgtagaagt tcctatactt tctagagaat  
2521 aggaacttcg cgactcatag aattattcc tcccgttaa taatagataa ctataaaaa  
2581 tagacaatac ttgctcataa gtaacgttac ttaaattgtt tactttggcg tgttcattg  
2641 ctgatgaaa ctgatttta gtaaacagtt gacgatattc tcgattgacc catttgaaa  
2701 caaagtacgt atatagcttc caatatttat ctggaacatc tgggtatgg cgggtaagtt  
2761 ttattaagac actgtttact tttggttag gatgaaagca ttccgctggc agcttaagca  
2821 attgctgaat cgagacttga gtgtgcaaga gcaaccctag tttcgggtga atatccaagg  
2881 tacgcttga gaatcctct tcaacaatca gatagatgc agacgatgg cttcaaaaa  
2941 ccacttttt aataattgt gtgcttaa atgtaaggaat actccaaca atttatacc  
3001 tctgtttgt aggaattga aactgtagaa tatcttggtg aattaaagt acacgagat  
3061 tcagtttaa ttttctgac gataagtga atagatgact gtctaattca atagacgta  
3121 cctgtttact tttttagcc agttcgtc ttaaatgcc tttacctgt ccaattcgt

3181 aaacggtatc ggtttctttt aaattcaatt gttttattat ttggttgagt actttttcac  
3241 tcgtaaaaaa gttttgagaa tattttatat ttttgttcat accagcacca gaagcaccag  
3301 catctcttgg gttaattgag gcctgagtat aaggtagactt atacttgtaa tctatctaaa  
3361 cggggaacct ctctagtaga caatcccgtg ctaaattgta ggactgccct ttaataaata  
3421 ctctatatt taaagaggta tttatgaaaa gcggaattta tcagatataa aatactttct  
3481 ctagagaaaa tttcgtctgg attagtact tatcgtgtaa aatctgataa atggaattgg  
3541 ttctacataa atgcctaacg actatccctt tggggagtag ggtcaagtga ctcgaaacga  
3601 tagacaactt gcttaacaa gttggagata tagtctgctc tgcattggtga catgcagctg  
3661 gatataattc cggggaaga ttaacgacct tatctgaaca taatgccata tgaatccctc  
3721 ctaatttata cgttttctct aacaacttaa ttatcccac tattattatt tttatcaata  
3781 tagaagttcc tatactttct agagaatagg aacttcacgc gttgggaaat ggcaatgata  
3841 gcgaaacaac gtaaaactct tgttgtatgc tttcattgct atcgtcacgt gattcataaa  
3901 cacaagtgaa tgctgacagt gaatttttac gaacgaacaa taacagagcc gtatactccg  
3961 agaggggtac gtacggttcc cgaagagggt ggtgcaaacc agtcacagta atgtgaacaa  
4021 ggcggtacct ccctacttca ccatatcatt ttctgcagcc ccctagaaat aattttgttt  
4081 aactttaaga aggagatata catatatggc tagatcgtcc attccgacag catcgccagt  
4141 cactatggcg tgctgctagc gctatatgcg ttgatgcaat ttctatgac tcgtagtagt  
4201 ctgagaaggg taacgccctt tacatggcaa aggggtacag ttattgtgta ctaaaattaa  
4261 aaattgatta gggaggaaaa cctcaaaatg aaaccaacaa tggcaattht agaagaatc  
4321 agtaaaaaat cacaagaaaa tatagacgaa gttttacaa gactttatcg ttatctttta  
4381 cgtccagata ttattacgt ggcgtatcaa aatttatatt ccaataaagg agctccaca  
4441 aaaggaatag tagatgatac agcggatggc tttagtgaag aaaaaataaa aaagattatt  
4501 caatctttaa aagacggaac ttactatcct caacctgtac gaagaatgta tattgcaaaa  
4561 aagaattcta aaaagatgag accttagga attccaactt tcacagataa attgatccaa  
4621 gaagctgtga gaataattct tgaatctatc tatgaaccgg tattcgaaga tgtgtctcac  
4681 ggttttagac ctcaacgaag ctgtcacaca gctttgaaaa caatcaaaag agagttggc  
4741 ggcgcaagat ggtttgtgga gggagatata aaaggctgct tcgataatat agaccagtt  
4801 aactcattg gactcatcaa tcttaaaatc aaagatatga aatgagcca atgatttat  
4861 aaatttctaa aagcaggta tctggaaaac tggcagtatc acaaaactta cagcgggaaca  
4921 cctcaagggtg gaattctatc tctcttttg gccaacatct atcttcatga attggataag  
4981 tttgttttac aactcaaaat gaagttgac cgagaaagtc cagaaagaat aacacctgaa  
5041 tatcgggagc tccacaatga gataaaaaga atttctcacc gtctcaagaa gttggagggt  
5101 gaagaaaaag ctaaagtctt tttagaatat caagaaaaac gtaaaagatt acccacactc  
5161 ccctgtacct cacagacaaa taaagtattg aaatacgtcc ggtatgcgga cgacttcatt  
5221 atctctgtta aaggaagcaa agaggactgt caatggataa aagaacaatt aaaactttt

5281 attcataaca agctaaaaat ggaattgagt gaagaaaaaa cactcatcac acatagcagt  
5341 caacccgctc gtttctggg atatgatata cgagtaagga gatctggaac gataaaacga  
5401 tctgtaaag tcaaaaagag aacactcaat gggagtgtag aactccttat tcctctcaa  
5461 gacaaaattc gtcaatttat tttgacaag aaaatagcta tccaaaagaa agatagctca  
5521 tggttccag ttcacaggaa atatcttatt cgttcaacag acttagaaat catcacaatt  
5581 tataattctg aactccgagg gatttgaat tactacggtc tagcaagtaa ttttaaccag  
5641 ctcaattatt ttgcttatct tatggaatac agctgtctaa aaacgatagc ctccaaacat  
5701 aaggaacac tttcaaaaac catttccatg ttaaagatg gaagtgggtc gtgggggatc  
5761 ccgatgaga taaagcaagg taagcagcgc cgttatttg caaatttag tgaatgtaa  
5821 tccccttacc aatttaccga tgagataagt caagctcctg tattgtatgg ctatgccgg  
5881 aatactctg aaaacagggt aaaagctaaa tgttgaat tatgtgggac gtctgatgaa  
5941 aatacttct atgaaattca ccatgtcaat aaggtaaaaa atcttaaagg caaagaaaaa  
6001 tgggaaatgg caatgatagc gaacaacgt aaaactctg ttgatgctt tcattgcat  
6061 cgtcacgtga ttcataaaca caagtgaatg tgcagcacc gttctcggag cactgtccga  
6121 ccgcttggc cggcccccag tctgtctgc ttcgctact ggagccacta tgcactcgc  
6181 gatcatggcg accacaccg tctgtggat cgccaagccg ccgatggtag tgtgggtct  
6241 ccccatgca gagtagggaa ctgccaggca tcaataaaaa cgaaaggctc agtcgaaaga  
6301 ctgggcctt cgtttatct gttgttgc ggtgaacgct ctctgagta ggacaaatcc  
6361 gccgggagcg gatttgaacg ttgcgaagca acggcccga gggggcggg caggacgccc  
6421 gccataaact gccaggcatc aaattaagca gaaggccatc ctgacggatg gccttttgc  
6481 gtttctaaa actcttctg tgcataatc tacaagccat cccccacag atacgggcg  
6541 gccgttga atccttagct aatggtcaa caggtacta tgacgaagat agcacctgg  
6601 ataagtctgt aatggattct aaggcattta atgaagacgt gtatataaaa tgtgctaag  
6661 aaaaagaaaa tgcgttaaaa gagcctaaaa tgagtcaaaa tggtttgaa attgattgt  
6721 agttaattt aatatattt ttctattgc tatctgata cctatagaat ctctgttca  
6781 ctttgtttt tgaatataa aaaggggctt ttagccctt tttttaa actccggagg  
6841 agtttctca ttctgatac tatacgaac tatttctgat ttgactcat tgcataaa  
6901 gctagtaaaa tcaatggta aaaaacaaaa aactgcatt ttctaccta gtaattata  
6961 atttaagtg tgcagttta aagtataatt taccagaaa ggagcaagtt ttttaataag  
7021 gaaaaattt tcctttaaa attctattc gttatatgac taattataat caaaaaaatg  
7081 aaaataaaca agagtaaaa actgcttag agaatgtac tgataaaaa agaaaaatc  
7141 ctgatttac gtcatacata gcacctta ctactaagaa aaatattgaa aggactcca  
7201 cttgtggaga ttattgtt atgtgagt atgcagact agaacattt aaattacata  
7261 aaggaattt ttccggaat agatttgc caatgttag ttggcgact gctgtaagg  
7321 atagtttaga aatatctatt ctatggagc atttaagaaa agaagaaaat aaagattta

7381 tattttaaact tcttacaact ccaaagttaa aaagttatga tcttaattat tctattaaac  
7441 aatataataa atctttaa aaattaatgg agcgttaagga agttaaggat ataactaaag  
7501 gttatataag aaaattagaa gtaacttacc aaaaggaaaa atacataaca aaggattat  
7561 ggaaaataaa aaaagattat tatcaaaaaa aaggactga aattggtgat ttagaacct  
7621 attttgatac ttataatcct catttcatg tagttattgc agttaataaa agttattta  
7681 cagataaaaa ttattatata aatcgagaaa gatggttga attatggaag ttgctacta  
7741 aggatgattc tataactcaa gttgatgta gaaaagcaaa aattaatgat tataaagagg  
7801 ttacgaact tgcgaaatat tcagctaaag aactgatta ttaatatcg aggccagtat  
7861 ttgaaattt ttataagca taaaaggca agcaggtatt agtttttagt ggattttta  
7921 aagatgcaca caaattgtac aagcaaggaa aacttgatgt ttataaaaag aaagatgaaa  
7981 ttaaatatgt ctatatagtt tattataatt ggtgcaaaaa acaatatgaa aaaactagaa  
8041 taagggaact tacggaagat gaaaagaag aattaaatca agatttaata gatgaaatag  
8101 aaatagatta aagtgaact atacttata tatatatgat taaaaaata aaaaacaaca  
8161 gcctattagg ttgtgttt ttatttctt tattaattt ttaatttt agtttttagt  
8221 tctttttaa aataagttc agcctcttt tcaatattt taaagaagg agtatttga  
8281 tgaattgcct ttttctaac agacttagga aatattttaa cagtatctc ttgcgccgt  
8341 gattttgga ctcataact tactaattta taattattt tttctttt aattgtaaca  
8401 gttgcaaaag aagctgaacc tgtcctca actagttat catctcaat ataattct  
8461 tgacctatat agtataaata ttttttatt atattttac ttttctga atctattt  
8521 ttataatcat aaaagttt accaccaaaa gaaggttga ctctcttg tccaacatat  
8581 ttttacta tattatctaa ataattttg ggaactggtg ttgtaattg attaactgaa  
8641 caaccagtt tacttaaagg aattataact ataaaaatat ataggattat cttttaa  
8701 ttcattatg gcctccttt tattaaatt atgttaccat aaaaaggaca taacgggaat  
8761 atgtagaata ttttaatt agacaaaatt ttacataaat ataaagaaag gaagtgttg  
8821 ttaaattt atagcaact atcaaaaatt aggggataa aaattatga aaaaagggt  
8881 ttcgatgta ttttatgt taacttaat agtttgggt ttattacaa attcggccg  
8941 ccagtggca agttgaaaa ttcacaaaaa tgtgtataa tatcttgtt cattagagcg  
9001 ataaactga attgagagg gaacttagat ggtattgaa aaaattgata aaaatagtg  
9061 gaacagaaaa gagtatttg accactact tgcaagtga cctgtacct acagcatgac  
9121 cgttaaagt gatatacac aaataaagga aaaggaatg aaactatc ctgcaatgct  
9181 ttattatatt gcaatgattg taaaccgcca tcagagttt aggacggca tcaatcaaga  
9241 tggatgattg gggatatatg atgagatgat accaagctat acaatattc acaatgatac  
9301 tgaacattt tccagcctt ggactgagtg taagtctgac ttaaatcat ttttagcaga  
9361 ttatgaaagt gatacgcaac ggtatgaaa caatcataga atggaaggaa agccaatgc  
9421 tccgaaaaac attttaattg tatctatgat accgtgtca acctcgatg gcttaattc

9481 gaattgcag aaaggatat attattgat tctatTTTT actatgggga aatattataa  
9541 agaagataac aaaattatac ttccttggc aattcaagtt catcacgcag tatgtgacgg  
9601 atttcacatt tgccgtttg taaacgaatt gcaggaattg ataaatagtt aacttcaggt  
9661 ttgtctgtaa ctaaaaacaa gtatttaagc aaaaacatcg tagaaatacg gtgtttttg  
9721 ttaccctaag tttaaactcc ttttgataa tctcatgacc aaaatccctt aacgtgagtt  
9781 ttcgtccac tgagcgtcag accccgtaga aa

//

**7. Plasmid series pGM-ACBQ to pGM-ICBQ.** One representative GenBank document is shown.

LOCUS pGM-ACBQ 9910 bp ds-DNA circular SYN 23-3?-2021

DEFINITION [pMTL007C-E2:203297].

ACCESSION DNA2.0

VERSION .

KEYWORDS pMTL007C-E2-Clostron\_82\_16S\_685\_Spec (Ra514+Ra512)

SOURCE synthetic DNA construct

ORGANISM synthetic DNA construct

REFERENCE 1 (bases 1 to 9910)

AUTHORS .

TITLE Direct Submission

JOURNAL Exported Sunday, Jul 10, 2016 from SnapGene Viewer 3.1.2

<http://www.snapgene.com>

REFERENCE 2 (bases 1 to 9910)

AUTHORS .

TITLE Direct Submission

JOURNAL Exported 2021?10?28? from SnapGene 2.3.2

<http://www.snapgene.com>

FEATURES Location/Qualifiers

source 1..9910

/organism="synthetic"

/note="color: #ffffff"

source 2543..3378

/organism="synthetic DNA construct"

/mol\_type="other DNA"

/note="color: #ffffff"

source 6642..9032



```

/organism="synthetic DNA construct"
/mol_type="other DNA"
/note="color: #ffffff"
source    9033..9053
/organism="synthetic DNA construct"
/mol_type="other DNA"
/note="color: #ffffff"
source    9033..9035
/organism="Shuttle vector pMTL85151"
/mol_type="other DNA"
/note="color: #ffffff"
/db_xref="taxon:647635"
misc_feature 1..620
/product="Ori_pBR"
/label="Ori_pBR"
/note="Ori_pBR"
/note="color: #ffff00"
misc_feature 807..1532
/product="oriT [ident:99.86, cov:97.84]"
/label="oriT [ident:99.86, cov:97.84]"
/note="oriT [ident:99.86, cov:97.84]"
/note="color: #a6acb3"
misc_feature 1002..1439
/product="traJ_*"
/label="traJ_*"
/note="traJ_*"
/note="color: #993366; direction: RIGHT"
misc_feature 1582..1757
/product="P_fdx"
/label="P_fdx"
/note="P_fdx"
/note="color: #a6acb3"
misc_feature 1779..2087
/product="insert:"
/label="insert:"

```

```

        /note="insert:"
        /note="color: #0000ff"
gene      1779..2087
        /gene="Csp_316-736s"
        /label="Csp_316-736s"
        /note="16S_685"
        /note="Csp_316-736s"
        /note="color: #0000ff; direction: RIGHT"
misc_feature complement(2496..2529)
        /note="FRT (minimal)"
        /note="color: #008080; direction: LEFT"
misc_feature 2496..2529
        /note="FRT site"
        /note="color: #a6acb3"
CDS       complement(2626..3378)
        /gene="aad9"
        /note="aad9"
        /note="color: #993366; direction: LEFT"
misc_feature 3411..3803
        /note="td intron"
        /note="color: #a6acb3"
misc_feature 3804..3880
        /note="thl promoter"
        /note="color: #ffffff"
misc_feature complement(3881..3914)
        /note="FRT (minimal)"
        /note="color: #008080; direction: LEFT"
misc_feature 3881..3914
        /note="FRT site"
        /note="color: #a6acb3"
misc_feature 4189..4201
        /product="strong RBS"
        /label="strong RBS"
        /note="strong RBS"
        /note="color: #a6acb3"

```

misc\_feature 4386..6185  
/note="ltrA"  
/note="color: #993366; direction: RIGHT"

misc\_feature 6362..6592  
/product="Term\_rrnBT1T2"  
/label="Term\_rrnBT1T2"  
/note="Term\_rrnBT1T2"  
/note="color: #a6acb3"

CDS 7154..8209  
/gene="repA"  
/note="repA"  
/note="color: #993366; direction: RIGHT"

CDS complement(8300..8803)  
/gene="orf2"  
/note="orf2"  
/note="color: #993366; direction: LEFT"

misc\_feature 9127..9750  
/note="catP"  
/note="color: #ff0000; direction: RIGHT"

## ORIGIN

```
1 agatcaaagg atcttctga gatcctttt ttctgcgct aatctgctgc ttgcaacaa
61 aaaaccacc gctaccagcg gtggttgtt tgccgatca agagtacca actcttttc
121 cgaaggtaac tggctcagc agagcgcaga taccaaatac tgccttcta gtgtagccgt
181 agttaggcca ccactcaag aactctgtag caccgcctac atacctcgct ctgctaatcc
241 tgtaccagt ggctgctgcc agtgccgata agtcgtgtct taccgggtg gactcaagac
301 gatagtacc ggataaggcg cagcggtcgg gctgaacggg gggttcgtgc acacagccca
361 gcttgagcg aacgacctac accgaactga gatactaca gcgtgagcat tgagaaagcg
421 ccacgctcc cgaagggaga aaggcggaca ggtatccggt aagcggcagg gtcggaacag
481 gagagcgcac gagggagctt ccagggggaa acgcttgta tcttatagt cctgtcgggt
541 ttcgccacct ctgactgag cgtcgatttt tgtgatgctc gtcagggggg cggagcctat
601 ggaaaaacgc cagcaacgcg gccttttac ggttctggc cttttgctgg cttttgctc
661 acatgttct tctgctgta tcccctgatt ctgtggataa ccgtattacc gcctttgagt
721 gagctgatac cgctcgccg agccgaacga ccgagcgcag cgagtcagtg agcgaggaag
781 cggaagagcg cccaatacgc agggccccct gcttcggggg cattatagcg atttttcgg
841 tatatccatc cttttcgca cgatatacag gattttgcca aagggttcgt gtagactttc
```

901 cttggtgtat ccaacggcgt cagccgggca ggataggtga agtaggcca cccgagcg  
961 ggtgttcctt cttactgtc ccttattcgc acctggcggg gctcaacggg aatcctgctc  
1021 tgcgaggctg gccggctacc gccggcgtaa cagatgaggg caagcggatg gctgatgaaa  
1081 ccaagccaac caggaagggc agcccaccta tcaaggtgta ctgcctcca gacgaacgaa  
1141 gagcgattga ggaaaaggcg gcgggcgccg gcatgagcct gtcggcctac ctgctggccg  
1201 tccggcaggg ctacaaaatc acgggcgtcg tggactatga gcacgtccgc gagctggccc  
1261 gcatcaatgg cgacctgggc cgctgggcg gctgtgtaa actctggctc accgacgacc  
1321 cgcgacggc gcggttcgt gatgccacga tcctcgcct gctggcgaag atcgaagaga  
1381 agcaggacga gcttggaag gtcattgatg gcgtggccg cccgagggca gagccatgac  
1441 tttttagcc gctaaaacgg ccgggggggtg cgcggtgattg ccaagcacgt ccccatgctc  
1501 tccatcaaga agagcgactt cgcgaggctg gtgaagtaca tcaccgacga gcaaggcaag  
1561 accgatcggg ccccctgcag ggtgtagtag cctgtgaaat aagtaaggaa aaaaaagaag  
1621 taagtgtat atatgatgat ttttttag atgtagatag gataatagaa tccatagaaa  
1681 atataggta tacagttata taaaaattc ttaaaaaatt aataaaaaca tggtaaaata  
1741 taaatcgtat aaagttgtt aatttttaag ctttataatt atccttagcc ttcgccactg  
1801 tgcgccaga taggggtgta agtcaagtag ttaaggtag tactctgtaa gataacacag  
1861 aaaacagcca acctaaccga aaagcgaag ctgatacggg aacagagcac gggtggaag  
1921 cgatgagta cctaaagaca atcgggtacg actgagtcgc aatgttaac agatataagg  
1981 tataagttg gtttactgaa cgcaagttc taatttcgat taaggctcga tagaggaaag  
2041 tgtctgaaac ctctagtaca aagaaagga agttaccagt ggcgacttat ctgttatcac  
2101 cacattgta caatctgtg gagaacctat gggaacgaaa cgaaagcgt gccgagaatc  
2161 tgaattacc aagactaac actaactggg gataccctaa acaagaatgc ctaatagaaa  
2221 ggaggaaaaa ggctatagca ctgagcttg aaaatctgc aagggtacgg agtactcgt  
2281 gtactctgag aagggtaacg ccctttacat ggcaaagggg tacagttatt gtgtactaaa  
2341 attaaaaatt gattagggag gaaaacctc aatgaaacc aacaatggca attttagaaa  
2401 gaatcagtaa aaattcaca gaaaatatag acgaagttt tacaagactt tatcgttatc  
2461 ttttacgtcc agatatttat tacgtggcga cgcgtaagt tcctatactt tctagagaat  
2521 aggaacttcg cgactcatag aaccaattag aatgaatatt tcccaaatat taaataataa  
2581 aacaaaaaaa tgaaaaaag tgtttccacc atttttcaa ttttttata attttttaa  
2641 tctgttattt aaatagttta tagttaatt tacatttca ttagtccatt caatattctc  
2701 tccaagataa ctacgaactg ctaacaaaat tctctoccta tgttctaatg gagaagattc  
2761 agccactgca ttcccgcaa tatctttgg tatgattta cccgtgtcca tagttaaata  
2821 catacggcat aaagttaata tagagttgt ttcatcatcc tgataattat ctattaattc  
2881 ctctgacgaa tccataatgg ctctctcac atcagaaaa ggaatatcag gtagtaattc  
2941 ctctaagta taattccgt atattcttt atttttcgt ttgcttgg aaagcattat

3001 ggtaaactct gaattaatt ccttctgagg aatgtatcct tgtcataaa gctcttgtaa  
3061 ccattctcca taaataaatt cttgtttggg aggatgattc cacggtacca tttctgctg  
3121 aataataatt gtaattcaa tatatcgtaa gttgcttta tctcctattt tctttgaaat  
3181 aggtctaatt tttgtataa gtatttctt actttgatct gtcaatggtt cagatacgac  
3241 gactaaaaag tcaagatcac tatttggtt tagtccactc tcaactcctg atccaaacat  
3301 gtaagtacca ataaggttat ttttaaatg ttccgaagt attttttca ctttattaat  
3361 ttgttcgat gtattcatac cagcaccaga agcaccagca tctctgggt taattgaggc  
3421 ctgagataa ggtgacttat acttgaatc tatctaaacg gggaacctct ctgtagaca  
3481 atcccgtgct aaattgtagg actgccctt aataaatact tctatattta aagaggtatt  
3541 tatgaaaagc ggaattatc agattaaaaa tactttctct agagaaaatt tcgtctggat  
3601 tagttactta tcgtgtaaaa tctgataaat ggaattgggt ctacataaat gcctaacgac  
3661 tatcccttg gggagtaggg tcaagtgact cgaaacgata gacaactgc ttaacaagt  
3721 tggagatata gtctgctctg catggtgaca tgcagctgga tataattccg gggaagatt  
3781 aacgacctta tctgaacata atgcatatg aatccctct aatttatac tttctctaa  
3841 caactaatt ataccacta ttattatit tatcaatata gaagttccta tactttctag  
3901 agaataggaa cttcacgctg tgggaaatgg caatgatagc gaaacaacgt aaaactctg  
3961 ttgtatgctt tcattgcat cgtcacgta tcataaaca caagtgaatg tcgacagtga  
4021 atttttacga acgaacaata acagagccgt atactccgag aggggtacgt acggttccc  
4081 aagagggggtg tgcaaaccag tcacagtaat gtgaacaagg cgttacctcc ctactcacc  
4141 atatcatit ctgcagcccc ctagaataa tttgtttaa cttaagaag gagatataca  
4201 tatatggcta gatcgtccat tccgacagca tcgccagtca ctatggcgtg ctgctagcgc  
4261 tatatgcgtt gatgcaatt ctatgcactc gtagtagtct gagaagggtg acgccctta  
4321 catggcaaag ggttacagtt attgtgtact aaaattaaa attgattagg gaggaaaacc  
4381 tcaaatgaa accaacaatg gcaattttag aaagaatcag taaaaattca caagaaaata  
4441 tagacgaagt tttacaaga ctttatcgtt atctttacg tccagatatt tattacgtg  
4501 cgtatcaaaa tttatattcc aataaaggag ctccacaaa agaatatta gatgatacag  
4561 cggatggctt tagtgaagaa aaaataaaaa agattattca atcttaaaa gacggaact  
4621 actatcctca acctgtacga agaattgata ttgcaaaaaa gaattctaaa aagatgagac  
4681 ctttaggaat tccaacttc acagataaat tgatccaaga agctgtgaga ataattctg  
4741 aatctatcta tgaaccggtg ttcgaagatg tgtctcacgg ttttagacct caacgaagct  
4801 gtcacacagc ttgaaaaca atcaaaagag agtttggcgg cgcaagatgg ttgtggagg  
4861 gagatataa aggctgctc gataatag accacgttac actcattgga ctcatcaatc  
4921 ttaaatcaa agatatgaaa atgagccaat tgattataa atttctaaa gcaggttatc  
4981 tggaaaactg gcagatcac aaaacttaca gcggaacacc tcaaggtgga attctatctc  
5041 ctctttggc caacatctat cttcatgaat tggataagt ttgtttacaa ctcaaatga

5101 agtttgaccg agaaagtcca gaaagaataa cacctgaata tcgggagctc cacaatgaga  
5161 taaaaagaat ttctaccgt ctcaagaagt tggagggtga agaaaaagct aaagttcttt  
5221 tagaatatca agaaaaacgt aaaagattac ccacactccc ctgtacctca cagacaaata  
5281 aagtattgaa atactccgg tatgccgacg acttcattat ctctgttaa ggaagcaaag  
5341 aggactgtca atggataaaa gaacaattaa aactttttat tcataacaag ctaaaaatgg  
5401 aattgagtga agaaaaaaca ctcatcacac atagcagtca acccgctcgt tttctgggat  
5461 atgatatacg agtaaggaga tctggaacga taaaacgac tggtaaagtc aaaaagagaa  
5521 cactcaatgg gagttagaa ctcttattc ctctcaaga caaaatcgt caattattt  
5581 ttgacaagaa aatagctatc caaaagaaag atagctcatg gttccagtt cacaggaaat  
5641 atcttattcg ttcaacagac ttagaaatca tcacaattta taattctgaa ctccgaggga  
5701 tttgtaatta ctacggctca gcaagtaatt ttaaccagct caattattt gcttatctta  
5761 tggaatacag ctgtctaaaa acgatagcct ccaaacataa gggaaacact tcaaaaacca  
5821 ttccatggt taaagatgga agtggtcgt ggggatccc gtatgagata aagcaaggta  
5881 agcagcgccg ttatttgca aatttagtg aatgtaaac ccctatcaa ttacggatg  
5941 agataagtca agctctgta ttgatggct atgcccggaa tactctgaa aacaggtaa  
6001 aagctaaatg ttgtgaatta tggggacgt ctgatgaaa tacttctat gaaatcacc  
6061 atgtcaataa ggtaaaaat cttaaaggca aagaaaaatg ggaaatggca atgatagcga  
6121 aacaacgtaa aactctgtt gtatgcttc attgtatcg tcacgtgatt cataaacaca  
6181 agtgaatgc gagcaccgt tctcgagca ctgtccgacc gtttgccg cgcaccagtc  
6241 ctgctcgtt cgctactgg agccactatc gactacgca tcatggcgac cacaccgctc  
6301 ctgtggatcg ccaagccgcc gatggtatg tgggtctcc ccatgcgaga gtagggaact  
6361 gccaggcatc aaataaacg aaaggctcag tcgaaagact gggccttcg tttatctgt  
6421 tgtttgctg tgaacgctc cctgagtagg acaaatccgc cgggagcggg tttgaacgtt  
6481 gcgaagcaac ggcccggagg gtggcgggca ggacggcgc cataaactgc caggcatcaa  
6541 attaagcaga aggccatct gacggatggc cttttgctt tctacaaac tctcctgtc  
6601 gtcatatcta caagccatc cccacagat acggcgcgcg cgttctgaat ccttagctaa  
6661 tggttcaaca ggtaactatg acgaagatg caccctggat aagtctgtaa tggattctaa  
6721 ggcatttaat gaagacgtgt atataaatg tgctaatgaa aaagaaaatg cgttaaaaga  
6781 gcctaaaatg agttcaaatg gtttgaaat tgattgtag ttaatttaa tatattttt  
6841 ctattggcta tctgatacc tatagaatct tctgttact tttgttttg aaatataaaa  
6901 aggggcttt tagcccttt ttttaaac tccggaggag tttctcatt cttgatacta  
6961 tacgtaacta tttcgattt gacttcattg tcaattaagc tagtaaaatc aatggtaaa  
7021 aaacaaaaa cttgcattt tctacctagt aattataat ttaagtgtc gagtttaaa  
7081 gtataattta ccaggaaagg agcaagttt ttaataagga aaaattttc ctttaaaa  
7141 tctattcgt tatatgacta attataatca aaaaatgaa aataacaag agtataaac

7201 tgcttagag aaatgactg ataaaaaag aaaaaatcct agatttacgt catacatagc  
7261 accttaact actaagaaaa atattgaaag gactccact tgtggagatt attgtttat  
7321 gttgagtgat gcagacttag aacatthta attacataaa ggtaattht gcggaatag  
7381 atthtgcca atgtgtagt ggcgactgc ttgtaaggat agthtagaaa tatctattct  
7441 tatggagcat ttaagaaaag aagaaaataa agagthtata ththtaactc ttacaactcc  
7501 aatgtaaaa agthtatgac ttaattattc tattaacaa tataataaat cththaaaa  
7561 attaatggag cgaaggaag ttaaggatat aactaaaggt tatataagaa aattagaagt  
7621 aactacca aaggaaaaat acataacaaa ggatttatgg aaaataaaaa aagattatta  
7681 tcaaaaaaaaa ggactgaaa ttggtgattt agaacctaat thgatactt ataactcctca  
7741 ththcatgta gthttgcag ttaataaaag ththttaca gataaaaaatt attatataa  
7801 tcgagaaaaga tggthggaat tatggaagth tgctactaag gatgattcta taactcaagt  
7861 tgatgtaga aaagcaaaaa ttaatgatta taaagaggtt tacgaactg cgaaatattc  
7921 agctaaagac actgattatt taatctgag gccagthtt gaaatthtt ataaagcatt  
7981 aaaaggcaag caggtattag ththtagtg atththtaa gatgcacaca aattgtaca  
8041 gcaaggaaaa ctgtagtht ataaaaagaa agatgaaatt aatatgtct atagthta  
8101 ttataatgg tgcaaaaaac aatatgaaaa aactagaata agggaactta cggaagatga  
8161 aaaagaagaa ttaatcaag ththaataga tgaatagaa atagthtaa gtgtaactat  
8221 actthtata tatatgatta aaaaaataa aaacaacagc ctattaggtt gthgthttt  
8281 atthcttht thththttt thththtag ththtagthc thththaaa thagthtcag  
8341 cctctthtc aatththtt aaagaaggag ththtgatg aattgcctth thctaacag  
8401 acttaggaaa ththtaaca gtatctctt gcgccggtga ththggaact tcataactta  
8461 ctaatthta thththttt ththththaa thgtaacagt tgcaaaagaa gctgaacctg  
8521 thcttcaac thgthtaca ththcaatat aatattctg acctatatag tataaatata  
8581 thththttat thththactt ththctgaa ctaththtt ataactataa aaagthttac  
8641 caccaaaaga aggtgtact cctctggtc caacatatt ththactata ththctaat  
8701 aatthtggg aactggtgt gtaatthgat ththcgaaca accagthata cttaaaggaa  
8761 ttataactat aaaaatat aggattatct ththaaatt cattattggc ctctthta  
8821 thaaattht gthaccataa aaaggacata acgggaatat gtagaatatt ththaatgtag  
8881 acaaaattht acataaatat aaagaaagga agththgtt thaaattht agcaactat  
8941 caaaatthg ggggataaaa ththtagaaa aaaaggttht cgatgthatt ththgthta  
9001 actthaatag thtggttht ththcaaat tggccggcc agthggcaag thgaaaaatt  
9061 cacaaaaatg tggataata ththgttca thtagcgat aaactgaa thgagagga  
9121 acttagatg ththgaaaa aattgataa aatagthgga acagaaaaga gththtgac  
9181 cactactthg caagtgtacc thgtacctac agcatgaccg thaaagtga ththcacaa  
9241 ataaaggaaa agggaatgaa actatctct gcaatgctth ththattgac aatgattga

9301 aaccgccatt cagagtttag gacggcaatc aatcaagatg gtgaattggg gatatatgat  
9361 gagatgatac caagctatac aatatttcac aatgatactg aaacatttc cagccttgg  
9421 actgagtga agtctgactt taaatcattt ttagcagatt atgaaagtga tacgcaacgg  
9481 tatggaaaca atcatagaat ggaaggaaag ccaaatgctc cggaaaacat ttttaatgta  
9541 tctatgatac cgtgggcaac cttcgatggc tttaatctga attgcagaa aggatatgat  
9601 tattgattc ctatTTTTac tatggggaaa tattataaag aagataacaa aattatactt  
9661 ccttggcaa tcaagtca tcacgcagta tgtgacggat tcacatttg ccgTTTTgta  
9721 aacgaattgc aggaattgat aaatagtaa cttcaggttt gtctgtaact aaaaacaagt  
9781 atttaagcaa aaacatcgta gaaatacggg gTTTTgtt acctaagtt taaactcctt  
9841 tttgataatc tcatgaccaa aatcccctaa cgtgagttt cgttccactg agcgtcagac  
9901 cccgtagaaa

//

**8. Plasmid series pGM-NAC<sub>2</sub>B, NAC<sub>2</sub>P, NACO.** One representative GenBank document is shown.

LOCUS pGM-NAC<sub>2</sub>B 4204 bp ds-DNA circular SYN 04-4?-2020

DEFINITION synthetic circular DNA.

ACCESSION .

VERSION .

KEYWORDS pExchange\_pseudo\_Bac\_16S\_CatP

SOURCE synthetic DNA construct

ORGANISM synthetic DNA construct

REFERENCE 1 (bases 1 to 4204)

AUTHORS .

TITLE Direct Submission

JOURNAL Exported Tuesday, Apr 25, 2017 from SnapGene Viewer 3.3.3

<http://www.snapgene.com>

REFERENCE 2 (bases 1 to 4204)

AUTHORS .

TITLE Direct Submission

JOURNAL Exported 2021?10?28? from SnapGene 2.3.2

<http://www.snapgene.com>

COMMENT [DEFINITION]: . [LOCUS]: [ACCESSION]:.

FEATURES Location/Qualifiers

source 1..4204

/organism="synthetic DNA construct"



/mol\_type="other DNA"  
/note="color: #ffffff"  
source 2051..2102  
/label="500 bp upstream of tdk BT\_2275"  
/note="500 bp upstream of tdk BT\_2275"  
/note="500 bp upstream of tdk  
BT\_2275;ApEinfo\_fwdcolor=#e4e4e4 ApEinfo\_revcolor=#e2e2e2  
ApEinfo\_graphicformat=arrow\_data {{0 1 2 0 0 -1} {} 0}  
width 5 offset 0"  
/note="color: #ffffff"

CDS complement(30..890)  
/label="AmpR (bla)"  
/note="AmpR"  
/note="AmpR (bla);ApEinfo\_fwdcolor=#0080c0  
ApEinfo\_revcolor=#ff6ab5 ApEinfo\_graphicformat=arrow\_data  
{{0 1 2 0 0 -1} {} 0} width 5 offset 0"  
/note="color: #ccffcc; direction: LEFT"

CDS 1378..2001  
/gene="catP"  
/note="catP"  
/note="color: #993366; direction: RIGHT"

misc\_feature 2103..3336  
/label="GTGCTGTCGCTTCATTCTCTTCCACGACCTTCTCTTCTATCACCGGACAT  
TCAACTTCCTCTATTACAGGGGCTTGTTCCTTCAACAATGGGGGCTTCACTTTCCGCTT

CCGCTACAGGAGAAGGCGAGGCTTCCACCGGCACAGCACTTATCTCTTCCGACAACCTG  
TTCAAACGCTCCTGCATACGTAGGATGCTCCGCTTCAACAGTTCAGACAAAGTCTGA  
GTCGGCTCTTTAGAAAACGTATTCATGAGTAGCTTCAGCTCATGAACATCCAGCTCAA  
TATCTGTTAATAGCTTCTGTTTCATTTCCATCCATTGTTATTATGGTGCGAATGTAGG  
AATAATTTATGCAATAACTTAAAATAATGGATAATTTAACAGTTCTTGACATCGAAT  
TGTTTACCTTTGTCCACTCATTTATTTAATCAAGAAAGCACAAAATCACATGGTATT  
ATTTTCAGAAGACCACATACAAGAGACCAGAAGAAGAGGTAGAAATAGAGGTAATCTGC  
GGTTCAATGTTCTCCGAAAGACGGAGGAATTGATTTCGTAGGATGAAGAGAGCCAAGT  
TCGCACGCCAGCGTGTAGAGATATTCAAACCGGCCATCGACACCCGTTATTCGGAAGA  
AGACGTGGTATCACACGACAGTCATTCCATCGCGTCCACCCCTATCGATTCATCGGCT

CGACAGTCATTCCATCGCGTCCACCCCTATCGATTCATCGGCT  
AGTATCCTGTTGTTCACTTCTGAAATAGATGTAGTCGGCATCGACGAAGCACAGTTCT  
TTGATGACGGACTGATTGACGTATGCAGGCAGCTTGCCAATAACGGCATCCGTGTCAT  
CATCGCCGGACTGGATATGGACTTTAAAGGGAATCCCTTCGGACCGATGCCTCAATTA  
TGTGCCATTGCCGATGAAGTTTCCAAAGTTCATGCGATCTGCGTGAAGTGCGGTGATC  
TGGCATCTTTCTCTCATCGTACCGTCAAGAATGACAAGCAGGTACTTCTAGGAGAGAC

AGCCGAATACGAGCCGCTTTGCAGGGAGTGCTACCTCCGTGCACGGGGAGAGGACGGA  
CAGAAGATATAAACTCTATTTAAAACATATATGGAAAGAAAGAAGATAACATT"

/note="Synthetic universal 16S"

/note="Geneious type: Editing History Replacement"

/note="color: #0000ff; direction: RIGHT"

rep\_origin 3404..4204

/label="R6K ori/RP4 oriT"

/note="R6K ori/RP4 oriT"

/note="R6K ori/RP4 oriT;ApEinfo\_fwdcolor=#be7dff

ApEinfo\_revcolor=#ff0080 ApEinfo\_graphicformat=arrow\_data

{{0 1 2 0 0 -1} {} 0} width 5 offset 0"

/note="color: #ffff00"

## ORIGIN

1 acgcgttatg agtaaacttg gtctgacagt taccaatgct taatcagtga ggcacctatc  
61 tcagcgatct gtctatttcg ttcattcata gttgcctgac tccccgtcgt gtagataact  
121 acgatacggg agggccttacc atctggcccc agtgctgcaa tgataccgcg agaccacgcg  
181 tcaccggctc cagatttacc agcaataaac cagccagccg gaagggccga gcgcagaagt  
241 ggtcctgcaa ctttatccgc ctccatccag tctattaatt gttgccggga agctagagta  
301 agtagttcgc cagttaatag ttgcgcaac gttgttgcca tgctacagg catcgtggtg  
361 tcacgctcgt cgtttggtat ggcttcattc agctccggtt cccaacgac aaggcgagtt  
421 acatgatccc ccatgtgtg caaaaaagcg gttagctcct tcggtcctcc gatcgttgc  
481 agaagtaagt tggccgcagt gttatcactc atggttatgg cagcactgca taattctctt  
541 actgtcatgc catccgtaag atgcttttct gtgactggtg agtactcaac caagtcattc  
601 tgagaatagt gtatgcggcg accgagttgc tctgcccgg cgtaatacg ggataatacc  
661 gcgccacata gcagaacttt aaaagtgctc atcattggaa aacgttctc gggcgaaaa  
721 ctctcaagga tctaccgct gttgagatcc agttcgatgt aaccactcg tgcaccaac  
781 tgatcttcag catctttac ttcaccagc gtttctgggt gagcaaaaaac aggaaggcaa  
841 aatgccgcaa aaaaggaat aagggcgaca cggaaatgtt gaatactcat actcttctt

901 ttcaatcat ggccgcgga taaaagtcg gggattggtg acaaaaagg tgttctctc  
961 ttaagagaa atacgtttt gctaaacagt tgatattgag gtatcattt atcgtaaaag  
1021 acatthttgc tcaacaattg ctgacggaa atcaacaat ttagcattt tgtaaaaag  
1081 tcgctatata atttggtgaa ttggagtta tttcatatt ttgcatccc aagagtttct  
1141 cttaaagaga gaaacatct ttgcatacct ttccgaccg aattttatg tcgtaaagag  
1201 gggctttgca ggggtggac tcagaaagat gagaatagat gactattgta gttgaaacac  
1261 atagaaagtt gctgatatac agaccgatac gcatatcggg atgaacatg agtacgttct  
1321 ttctcaaaa aacataaata ttcgaaaaga gatgcaataa attaaggaga ggttataatg  
1381 gtatttga aaattgataa aaatagttg aacagaaaag agtattttga cactacttt  
1441 gcaagtgtac ctgtacct cagcatgacc gttaaagtgg atcacaca aataaaggaa  
1501 aaggaatga aactatacc tgcaatgctt tattatattg caatgattg aaaccgcat  
1561 tcagagttta ggacggcaat caatcaagat gggaattgg ggatatatga tgagatgata  
1621 ccaagctata caatattca caatgatac gaaacattt ccagccttg gactgagtgt  
1681 aagctgact taaatcatt ttagcagat tatgaaagt atacgcaac gtatggaac  
1741 aatcatagaa tggaaggaa gccaatgct ccgaaaaca ttttaatgt atctatgata  
1801 ccgtggtaa cctcgtggt cttaactct aattgcaga aaggatatga ttattgatt  
1861 cctatttta ctatgggaa atattataa gaagataca aaattatac tctttggca  
1921 attcaagttc atcacgagt atgtgacgga ttccacatt gccgtttgt aaacgaattg  
1981 caggaattga taaatagta accaataggc cacatgcaac tgtaaattgt tacgctctc  
2041 cgtaccgct tctccaca cagtctcgg ttctgtact atcacagggt catctctcc  
2101 cgcgaattcc tgcagcccgg gtgggatgc gttccattag gtattggcg gggaacggc  
2161 ccaccaagcc tacgatgat aggggtctg agaggaaggt cccacatt ggaactgaga  
2221 cacgtcca actctacgg gaggcagcag tgaggaatat tggcaatgg gcgagagcct  
2281 gaaccagcca agtagcgtg aggatgact ccctatgggt tgtaaacttc tttatawgg  
2341 gaataaagtt cgtacgtgt gggattttgt atgtaccata tgaataagga tcggctaact  
2401 ccgtgccagc agccgcgga atacggagga tccgagcgt atccggattt attgggtta  
2461 aaggagcgt agtgatcgt ttaagtcagt tgtgaaagt tgcggctca cgtaaaatt  
2521 gcagttgata ctggaggtct tgagtacagt agagtaggc ggaattcgt gttagcgg  
2581 gaaatgctta gatcacga agaactccga ttgcgaaggc agcttactag actgcaactg  
2641 aactgatgc tcgaaagtgt gggatcaaaa caggattaga taccctggta gtccacacag  
2701 taaacgatga atactcgtg ttgcatat acagtaagcg gccaaagcga agcattaagt  
2761 attccactg gggagtacgc cggcaacggt gaaactcaaa ggaattgac gggcccga  
2821 caagcggagg aacatgtgt ttaattcgt gatcgcgag gaacctacc cggcttaa  
2881 ttgtgaatt gaaacagct tagccgaag gcagatgta aggtgctgca tgggtgctg  
2941 cagctcgtc cgtgaggtgt cggcttaagt gccataacga gcgcaaccct tatcttagt

3001 tactaacagg tcatgctgag gactctagag agactgccgt cgtaagatgt gaggaaggtg  
3061 gggatgacgt caaatcagca cggcccttac gtccggggct acacacgtgt tacaatgggg  
3121 ggtacagaag gcagctacct ggcgacagga tgctaatccc aaaaacctct ctgattcgg  
3181 atcggagtct gcaacccgac tccgtgaagc tggattcgct agtaatcgcg catcagccac  
3241 ggcgcggtga atacgttccc gggccttga cacaccgccc gtcaagccat gaaagccggg  
3301 ggtacctgaa gtacgtggat ccactagttc tagagccgag tcgacgggtat cgataagctt  
3361 gatatcgaat tcctgcagcc cgggggatcc actagttcta gagcggccgc caccgcggtg  
3421 gaggggaatt cccatgtag cggtaagtg ttctgtgtc actcaaaatt gctttgagag  
3481 gctctaaggg ctctcagtg cgttacatcc ctggcttgt gtccacaacc gttaaactt  
3541 aaaagctta aaagcctat atattcttt tttctata aaactaaaa ccttagaggc  
3601 tatttaagtt gctgattat attaattta ttgtcaaac atgagagctt agtacgtgaa  
3661 acatgagagc ttagtacgtt agccatgaga gcttagtacg ttagccatga gggtttagtt  
3721 cgtaaacaat gagagcttag tacgttaac atgagagctt agtacgtgaa acatgagagc  
3781 ttagtacgta ctatcaacag gttgaactgc tgatctcag atctctacg ccggacgcat  
3841 cgtggccgga tcaattccgt tttccgctgc ataaccctgc ttcggggca ttatagcgat  
3901 ttttcggta tatccatcct tttcgcagc atatacagga tttgcaaaa gggttcgtgt  
3961 agactttcct tgggtatcc aacggcgtca gccgggcagg ataggtgaag taggcccacc  
4021 cgcgagcggg tttcctct tactgtccc ttattcgac ctggcgggtgc tcaacgggaa  
4081 tcctgctctg cgaggctggc cggctaccgc cggcgtaca gatgagggca agcggatggc  
4141 tgatgaaacc aagccaacca ggaagggcag cccacctatc acggaattga tccccctcga  
4201 attg

//
